# Supplementary material for: Comparison of the inedible parts of white and green asparagus based on metabolomics and network pharmacology
Source: Royal Society of Chemistry journal article supplement (doi:10.1039/d3fo01797d), 2023-01-01
Supplement: d3fo01797d1.pdf [file d3fo01797d1.pdf]

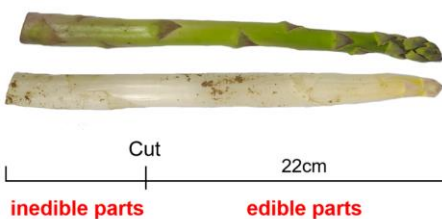

**Fig. S.1** Diagram of the edible and inedible parts of white and green Asparagus.

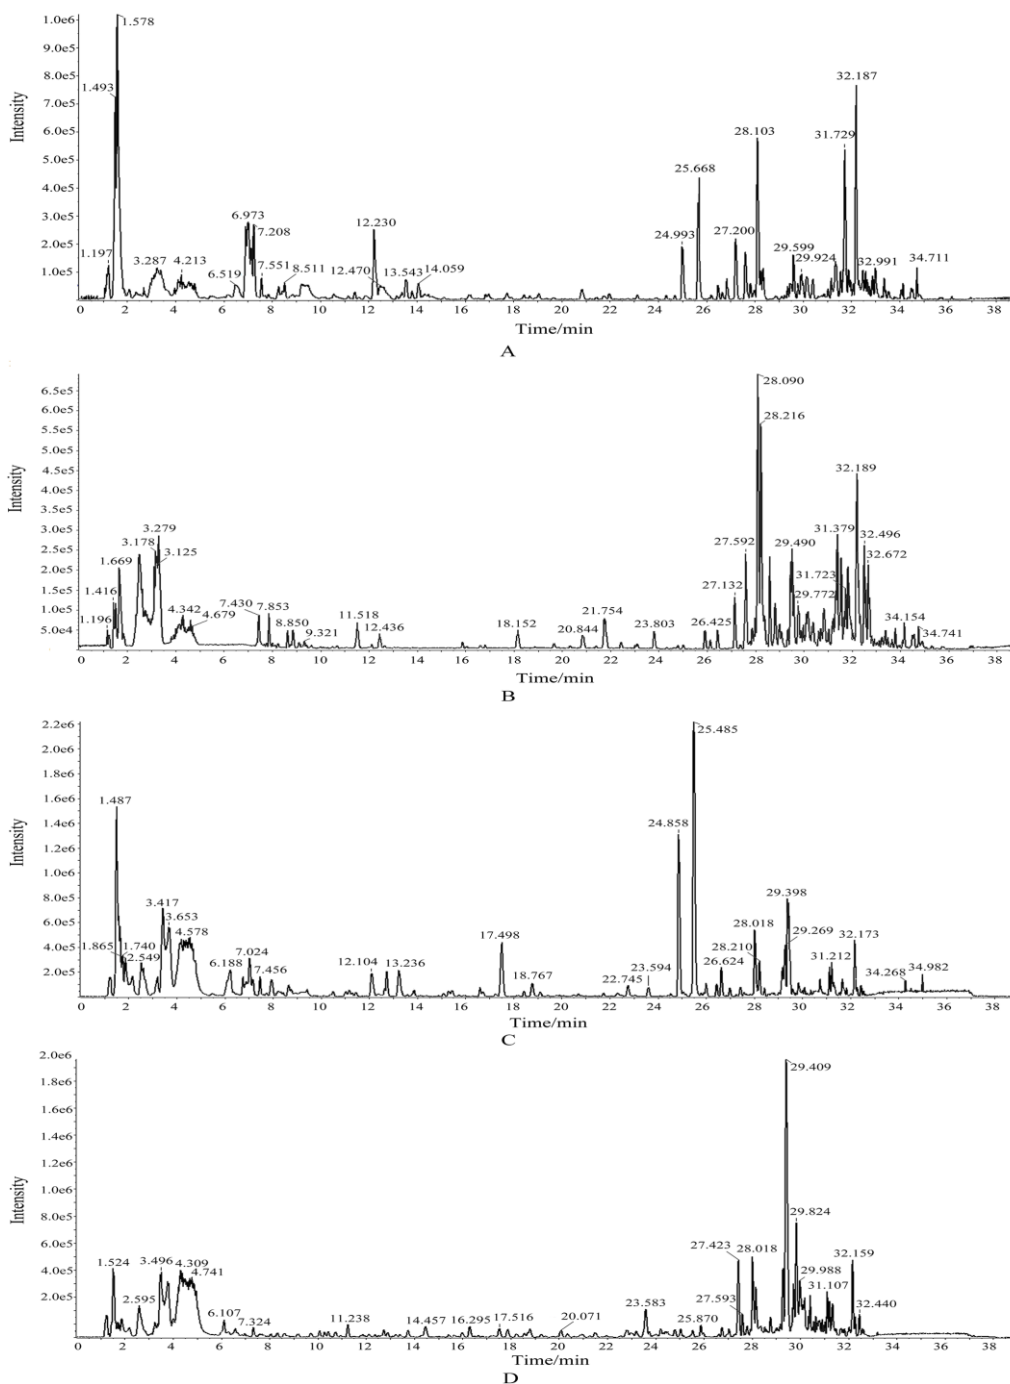

**Fig. S.2** Base peak intensity (BPI) chromatograms of the inedible parts of white and green Asparagus by UPLC-Q-TOF MS/MS analysis. A: The inedible parts of green Asparagus in positive ion pattern; B: The inedible parts of white Asparagus in positive ion pattern; C: The inedible parts of green Asparagus in negative ion pattern; D: The inedible parts of white Asparagus in negative ion pattern

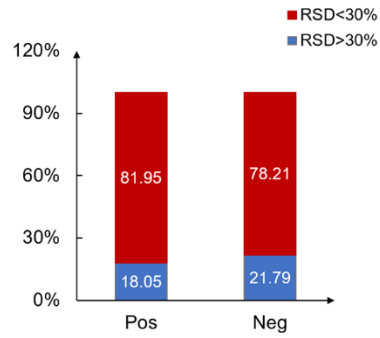

**Fig. S.3** RSD distribution of all compounds of QC samples in the metabolomics analysis.

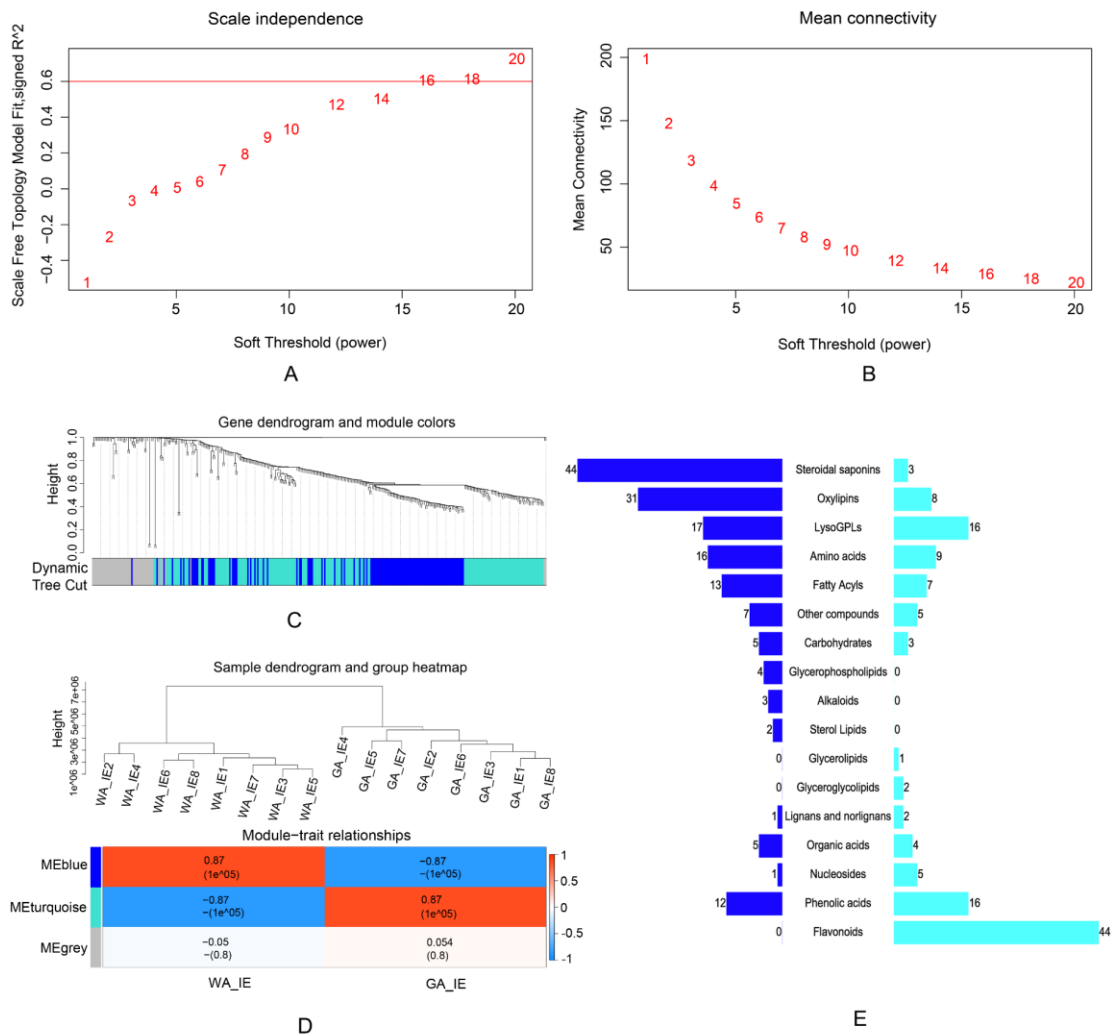

**Fig. S.4** Correlation of metabolites with the inedible part of white and green Asparagus based on WGCNA. (A)  $R^2$  corresponding to different soft thresholds; (B) the gene adjacency coefficients corresponding to different soft thresholds; (C) Clustering dendrogram of the average network adjacency for the identification of metabolite co-expression modules; (D) Sample cluster dendrogram and module-group relationships. Each row corresponded to a module eigengene, column to a variety. Each cell contained the corresponding correlation and value of p. The table was color-coded by correlation according to the color legend; (E) Distribution of different types of metabolites in blue and turquoise modules.

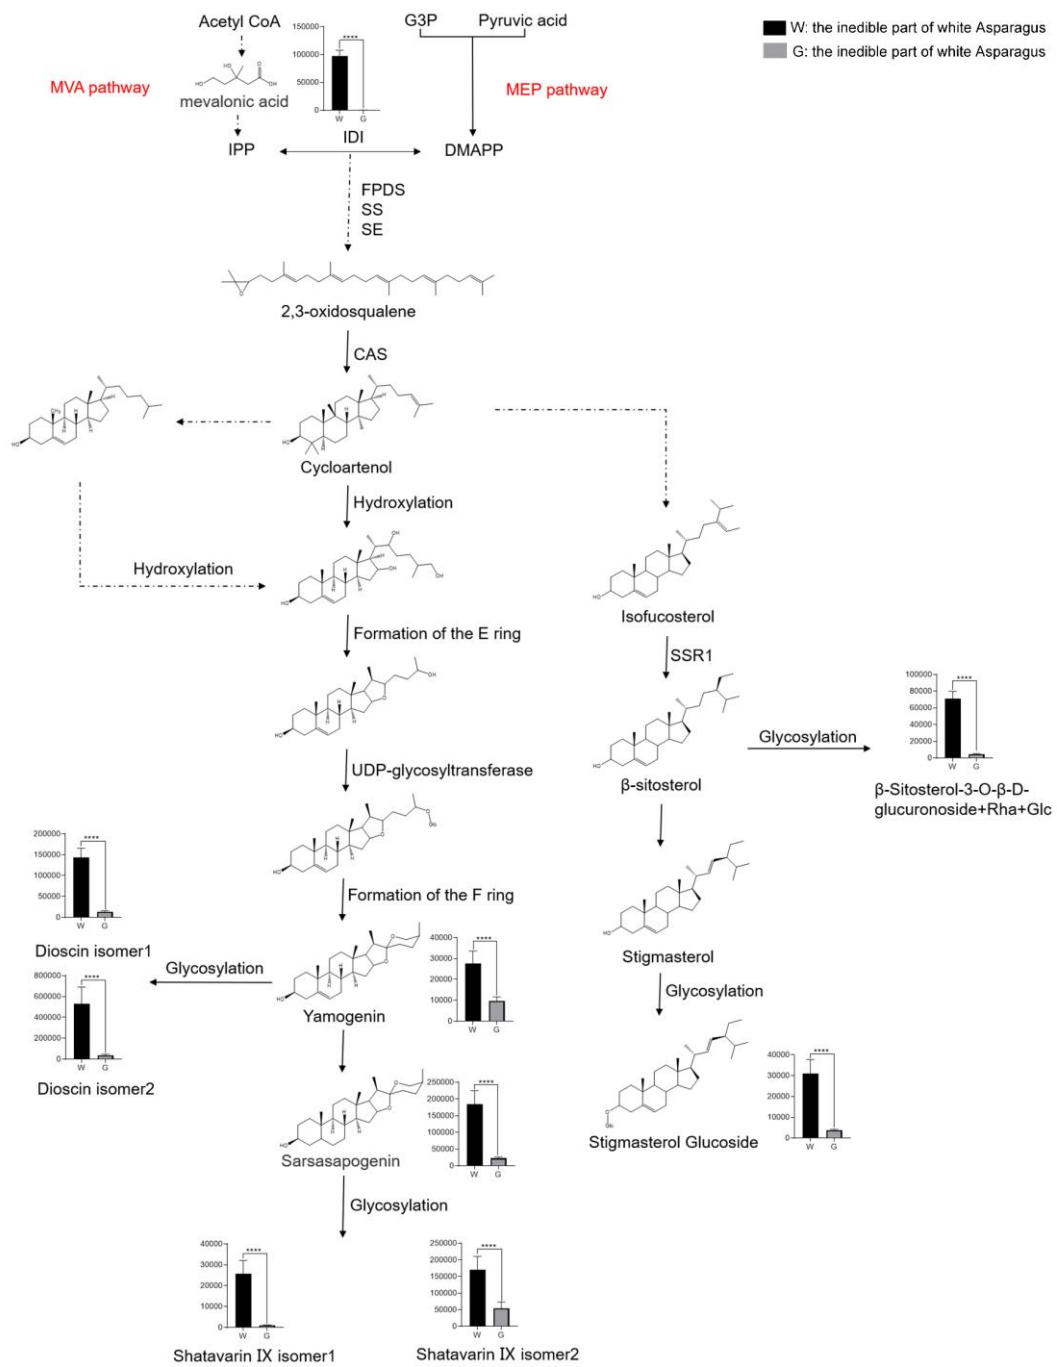

**Fig. S.5** Biosynthetic pathway of the steroid saponins.

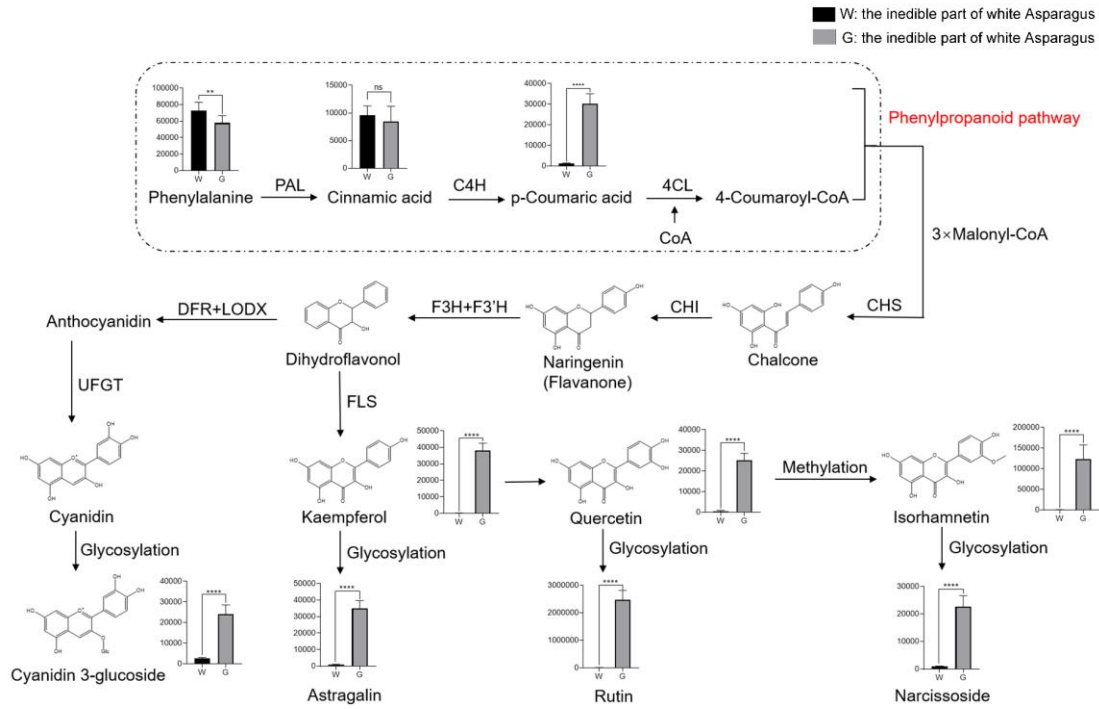

**Fig. S.6** Biosynthetic pathway of the flavonoids.

**Table S6** The model parameters of OPLS-DA

| Group          | Positive ion mode                             | Negative ion mode                             |
|----------------|-----------------------------------------------|-----------------------------------------------|
| WA_E vs WA_IE  | R <sup>2</sup> X=0.683, Q <sup>2</sup> =0.988 | R <sup>2</sup> X=0.741, Q <sup>2</sup> =0.990 |
| GA_E vs GA_IE  | R <sup>2</sup> X=0.700, Q <sup>2</sup> =0.976 | R <sup>2</sup> X=0.728, Q <sup>2</sup> =0.978 |
| WA_IE vs GA_IE | R <sup>2</sup> X=0.733, Q <sup>2</sup> =0.987 | R <sup>2</sup> X=0.755, Q <sup>2</sup> =0.992 |

**Table S7** Molecular docking results of sarsasapogenin and yamogenin with the related key targets

| Compound       | Target   | PDB ID | Binding energy (kcal·mol <sup>-1</sup> ) | Hydrogen-binding sites         | Hydrophobic sites                                                      |
|----------------|----------|--------|------------------------------------------|--------------------------------|------------------------------------------------------------------------|
| Sarsasapogenin | MTOR     | 4DRI   | -10.50                                   | ILE87                          | PHE77, ILE87, PHE130, LEU2031, PHE2039, TRP2101, PHE2108               |
|                | ALK      | 6MX8   | -10.18                                   | TRP1320, PRO1398               | LEU1325, TYR1327, PRO1331, ASP1349, PRO1351, LYS1352, PRO1398, GLU1400 |
|                | CDK4     | 2W96   | -9.23                                    | TRP238, HIS281                 | LEU186, GLN188, LEU223, TRP238, PHE278, PRO280                         |
|                | MDM2     | 1RV1   | -9.02                                    |                                | LYS51, LEU54, PHE55, LEU57, ILE61, PHE91, VAL93, ILE99                 |
|                | PIK3CA   | 4JPS   | -8.17                                    | TRP424, PRO447, GLN478         | TRP446, PRO447, GLN478, HIS676, LYS678                                 |
|                | VEGFA    | 4KZN   | -7.97                                    | CYS61                          | GLU67                                                                  |
|                | PTGS2    | 5F19   | -7.96                                    | TYR385, GLY526, GLY533, LEU534 | PHE205, VAL344, TYR348                                                 |
|                | HSP90AA1 | 4BQG   | -7.37                                    | LYS204, TYR216                 | VAL207, LYS208, GLN212                                                 |
| Yamogenin      | ALK      | 6MX8   | -9.74                                    | LYS1352, PRO1398               | LEU1325, TYR1327, PRO1331, ASP1349, PRO1351, LYS1352, PRO1398, GLU1400 |
|                | MDM2     | 1RV1   | -8.67                                    | HIS96                          | LEU54, LEU57, ILE61, VAL93, ILE99, TYR100                              |
|                | IL2      | 1M47   | -7.89                                    | LYS32, LYS35                   | ASN30, TYR31, LYS32, LYS35                                             |
|                | CDK4     | 2W96   | -7.85                                    |                                | LEU65, LYS72, GLU75, PHE78                                             |
|                | SRC      | 2BDF   | -7.20                                    | LYS316                         | LYS316, ASN381, LEU410                                                 |
