# Supplementary material for: Comparison of the inedible parts of white and green asparagus based on metabolomics and network pharmacology
Source: Royal Society of Chemistry journal article supplement (doi:10.1039/d3fo01797d), 2023-01-01
Supplement: d3fo01797d2.xlsx [file d3fo01797d2.xlsx]

## Sheet: Table S1
Table S1. Identification of chemical constituents in the inedible parts of white and green asparagus.
Number	Compound	Retention Time	Formula	Mass	Adduct	Mass error	Fragment ion	Type	Method	References
1	Filiasparoside B	27.74	C38H60O13	725.411	[M+H]+	0.4	563.3571,433.2620,271.2088,253.1950	Steroidal saponins	b	[28]
2	Pseudoprotoneodioscin+Glc	27.77	C57H92O26	1193.6	[M+H]+	-0.5	1193.5987,1031.5324,869.4949,723.4245,577.3720,415.3212,271.2097	Steroidal saponins	d
3	β-Sitosterol-3-O-β-D-glucuronoside+2Rha+Glc	27.78	C51H80O22	1045.52	[M+H]+	-2.4	1045.5174,883.4657,737.4096,591.3482	Steroidal saponins	d
4	Gracillin+Glc	27.81	C51H82O22	1047.54	[M+H]+	-2.6	1047.5322,885.4785,723.3544,577.3457,415.2480,271.2071,253.1990	Steroidal saponins	d
5	β-Sitosterol-3-O-β-D-glucuronoside+Rha+Glc	27.87	C45H70O18	899.463	[M+H]+	-2.1	899.4596,737.4066,593.2928,591.3526	Steroidal saponins	d
6	Dongnoside E	27.88	C50H82O22	1035.53	[M+H]+	-3.1	1035.5294,903.4831,873.4777,741.4374,579.3871,417.3355,273.2218	Steroidal saponins	d
7	Protodioscin	27.88	C51H84O22	1049.55	[M+H]+	-0.9	1049.5483,887.5009,741.4474,725.4439,433.3291,415.3145	Steroidal saponins	b	[26]
8	Aspidistrin	27.92	C50H80O22	1033.52	[M+H]+	-1.7	1033.5183,871.4673,739.4264,577.3727,415.3207,397.3108,271.2065	Steroidal saponins	d
9	Pamaqueside/ Agavoside B	27.95	C39H62O14	755.421	[M+H]+	-1.5	755.4208,737.3914,593.3606,431.2401,413.3053,395.2943	Steroidal saponins	d
10	Shatavarin IX isomer1	28	C45H74O18	903.495	[M+H]+	-2.1	903.4938,741.4416,597.3266,579.3879,417.3369,273.2221,255.2109	Steroidal saponins	b	[20]
11	(25S)-26-O-β-D-glucopyranosyl-5β-furost-20(22)-ene-3β,26-diol-3-O-β-D-glucopyranosyl-(1→2)-β-D-glucopyranoside	28.06	C45H72O18	901.478	[M+H]+	-1.1	901.4773,739.4263,577.3735,433.2572,415.3214,283.2433,271.2066,253.1959	Steroidal saponins	b	[14]
12	Stigmasterol Glucoside+Hex+2Rha	28.1	C51H80O21	1029.53	[M+H]+	-2.3	1029.5279,867.4705,721.4168,575.3705,413.3067,395.2927	Steroidal saponins	d
13	Pseudoprotoneodioscin isomer1	28.15	C51H82O21	1031.54	[M+H]+	-3.6	1031.5369,869.4848,577.3722,415.3192,271.2051,253.1946	Steroidal saponins	b	[23]
14	Polyphyllin D+Glc/ Parisyunnanoside B	28.16	C50H80O21	1017.53	[M+H]+	-3.5	1017.5225,855.4712, 709.4171,577.3729,415.3204,271.2068,253.1962	Steroidal saponins	d
15	Asparanin B5	28.17	C50H82O21	1019.54	[M+H]+	-8.6	1019.5319,857.4786,713.3681,579.3814,417.3335,273.2052,255.2076	Steroidal saponins	d
16	(3β,5β,25S)-26-(β-D-glucopyranosyl)-22-hydroxyfurostan-3-yl-6-O-(6-deoxy-a-L-mannopyranosyl)-β-D-glucopyranoside	28.25	C45H76O18	903.496	[M-H]-	1.6	757.4408,595.3865,433.3322,415.3326	Steroidal saponins	b	[26]
17	Yamogenin Glucoside+Glc+xyl isomer1	28.27	C44H70O17	871.468	[M+H]+	-2.3	871.4657,709.4138,577.3752,415.3200,271.2054,253.1947	Steroidal saponins	d
18	Yamogenin II isomer1	28.27	C45H72O17	885.484	[M+H]+	-2.4	885.4782 ,723.4269,577.3726,415.3188,271.2048,253.1942	Steroidal saponins	b	[24]
19	Polyphyllin VI isomer1	28.3	C39H62O13	739.426	[M+H]+	0.4	739.4268,577.3729,433.2589,415.3193,397.3102,271.2064,253.1949	Steroidal saponins	d
20	Dioscin+2Rha	28.3	C56H88O25	1161.57	[M+H]+	-1.4	1161.5653,1015.5056,723.4299,415.3206,397.3101, 253.1957	Steroidal saponins	d
21	(25S)-5β-spirostan-3β-ol-3-O-β-D-glucopyranosyl-(1→2)-[β-D-xylopyranosyl-(1→4)]-β-D-glucopyranoside isomer1	28.35	C44H72O17	873.484	[M+H]+	-4	873.4812,711.4294,579.3873,435.2653,417.3355,285.2581,273.2212,255.2110	Steroidal saponins	b	[14]
22	Aspacochioside D/ Asparinin B isomer1	28.36	C45H74O17	887.498	[M+H]+	-2.8	887.4968,741.4446,579.3874,417.3359,273.2218,255.2113	Steroidal saponins	b	[21, 23]
23	Methylprotodioscin	28.37	C52H86O22	1061.55	[M-H]-	1.1	915.4986,769.4468,607.4076,445.3433,247.0858,163.0619	Steroidal saponins	b	[12]
24	β-Sitosterol-3-O-β-D-glucuronoside+Glc	28.42	C40H64O13	753.442	[M+H]+	-0.5	753.4330,591.3848, 429.3175,271.2049,253.1931	Steroidal saponins	d
25	Dioscin+Rha	28.43	C50H78O21	1015.54	[M+H]+	-2.2	1015.5099,869.2858,577.3730,415.32,379.2940,253.1960	Steroidal saponins	d
26	Shatavarin IX isomer2	28.76	C45H74O18	903.495	[M+H]+	-3.8	903.4925,741.4425,597.3247,579.3954,417.3353,285.2627,273.2210,255.2106	Steroidal saponins	b	[20]
27	Stigmasterol Glucoside+2Rha	28.79	C45H70O16	867.472	[M+H]+	-3	867.4708,849.4580,721.4178,575.3613,559.3569,413.3040	Steroidal saponins	d
28	Polyphyllin VI isomer2	28.81	C39H62O13	739.426	[M+H]+	-0.1	739.4268,577.3729,433.2589,415.3193,397.3102,271.2064,253.1949	Steroidal saponins	d
29	Pseudoprotoneodioscin isomer2	28.84	C51H82O21	1031.54	[M+H]+	-1	1031.5387,869.4869,723.4300,577.3733,415.3203,271.2066,253.1963	Steroidal saponins	b	[23]
30	Dioscin isomer1	28.85	C45H72O16	869.489	[M+H]+	-1.9	887.4962,725.3681,577.3731,415.3208,271.2060.253.1955	Steroidal saponins	c
31	Yamogenin II isomer2	28.98	C45H72O17	885.484	[M+H]+	-0.6	885.4829 ,723.4302,577.3725,415.3205,271.2054,253.1946	Steroidal saponins	b	[24]
32	Aspacochioside D/ Asparinin B isomer2	29.06	C45H74O17	887.5	[M+H]+	-4.1	887.4965,725.4442,579.3866,417.3350,273.2217.255.2115	Steroidal saponins	b	[21, 23]
33	Stigmasterol Glucoside+Rha	29.09	C39H60O12	721.416	[M+H]+	-0.8	721.4158,575.3649,413.3021,395.2929	Steroidal saponins	d
34	Sarsasapogenin+H2O	29.46	C27H46O4	435.347	[M+H]+	-7	435.2538,417.2354,399.3253,277.2169	Steroidal saponins	d
35	Stigmasterol Glucoside	29.75	C33H50O8	575.358	[M+H]+	-2.8	575.3614,557.2527,413.3013,377.2886	Steroidal saponins	b	[13]
36	Sarsasapogenin M	30.32	C39H64O14	757.437	[M+H]+	-2.4	757.4353,595.3124,577.2963,415.2507,397.2621	Steroidal saponins	b	[14]
37	Asparanin A/ (25S)-5β-spirostan-3β-ol-3-O-β-D-glucopyranosyl-(1→2)-β-D-glucopyranoside isomer1	30.82	C39H64O13	741.442	[M+H]+	-0.5	579.3929,417.3374,285.2578,273.2219,255.2099	Steroidal saponins	b	[14]
38	Yamogenin Glucoside+Glc+xyl isomer2	30.84	C44H70O17	871.468	[M+H]+	1.2	871.4680,709.4107,577.3743,415.3206,271.2038,253.1944	Steroidal saponins	d
39	Filiasparoside D	30.85	C38H62O12	711.431	[M+H]+	-1.5	711.4313,579.3908,567.3156,417.3357,399.3269,273.2219,255.2112	Steroidal saponins	b	[28]
40	Asparanin A/ (25S)-5β-spirostan-3β-ol-3-O-β-D-glucopyranosyl-(1→2)-β-D-glucopyranoside isomer2	31.23	C39H64O13	741.442	[M+H]+	-3.3	741.4373,579.3852,435.2738,417.3356,285.2600,273.2217,255.2108	Steroidal saponins	b	[14]
41	Dioscin isomer2	31.32	C45H72O16	869.489	[M+H]+	0.2	725.3739,577.3760,415.3206,271.2054.253.1951	Steroidal saponins	c
42	Alliospiroside A	31.38	C38H60O12	709.417	[M+H]+	-0.3	577.3820,415.3229,271.2052,253.1944	Steroidal saponins	d
43	Polyphyllin D	31.4	C44H70O16	855.474	[M+H]+	-1.7	855.4710,711.3577,709.4767,577.3756,415.3212,271.2063,253.1957	Steroidal saponins	d
44	Reclinatoside	31.41	C50H80O20	1001.53	[M+H]+	-0.9	869.4801,723.4354,709.4330,577.3680,415.3199,271.2009,253.1936	Steroidal saponins	d
45	(25S)-5β-spirostan-3β-ol-3-O-α-L-rhamnopyranosyl-(1,2)-[α-l-rhamnopyranosyl-(1,4)]-β-D-glucopyranoside	31.62	C45H74O16	871.505	[M+H]+	-2.8	871.5050,725.4494,579.3882,417.3354,273.2216,255.2094	Steroidal saponins	b	[14]
46	Asparagoside A	31.63	C33H54O8	579.389	[M+H]+	-1.8	579.3833,417,2639,285.2660,273.2210,255.2108	Steroidal saponins	b	[14]
47	(25S)-5β-spirostan-3β-yl-O-[O-α-L-rhamnopyranosyl-(1-4)]-β-D-glucopyranoside	31.65	C39H64O12	725.447	[M+H]+	-4	725.4458,581.3297,563.3897,417.3367,273.2217,255.2116	Steroidal saponins	b	[23]
48	Filiasparoside C	31.67	C44H72O16	857.489	[M+H]+	-2.5	857.4888,725.4424,579.3895,417.3357,273.2236,255.2111	Steroidal saponins	b	[28]
49	Prosapogenin A/ Polyphyllin C	31.82	C39H62O12	723.431	[M+H]+	-0.7	723.4296,577.3704,415.3193,271.2034,253.1930,157.0988,85.0291	Steroidal saponins	c
50	Yamogenin	32.28	C27H42O3	415.321	[M+H]+	-1.3	415.3206,397.3110,271.2063,253.1953,147.1172	Steroidal saponins	c
51	Sarsasapogenin	32.71	C27H44O3	417.336	[M+H]+	-0.5	417.3354,399.3349,273.2219,255.2113	Steroidal saponins	b	[14]
52	Yamogenin+H2O	33.13	C27H44O4	433.331	[M+H]+	-2	433.3122,415.0444,397.2493,271.2145,253.1965	Steroidal saponins	d
53	25S-spirosta-1,4-dien-3-one	33.46	C27H38O3	411.289	[M+H]+	-1.2	411.2875,393.3136,267.1744	Steroidal saponins	b	[14]
54	Quercitin 3-O-glucosylrutinoside+Hex	18.61	C39H50O26	935.24	[M+H]+	1	773.2136,627.1548,611.1657,465.1013,303.0505	Flavonoids	d
55	Quercetin diglucoside	19.06	C27H30O17	627.156	[M+H]+	0.1	627.1508,465.1019,303.0497,257.0467,165.0200,85.0280	Flavonoids	b	[15]
56	Faralateroside isomer1	19.17	C33H40O20	757.219	[M+H]+	-0.5	757.2177,595.1649,449.1044,287.0552	Flavonoids	b	[27]
57	Cyanidin 3-O-rutinoside	19.39	C27H31O15+	595.166	[M]+	-1.1	449.1163,355.0610,287.0542,281.0539,221.0872	Flavonoids	d	[22]
58	Gallocatechin	19.54	C15H14O7	307.081	[M+H]+	-9.4	247.0567,229.0501,170.0837,112.0742,104.9804,70.0641	Flavonoids	b	[18]
59	Kaempferol 3-sophorotrioside 7-rhamnoside	20.91	C39H50O25	919.271	[M+H]+	0.3	919.2856,757.2296,611.1651,595.1756,449.1088,287.0546	Flavonoids	c
60	Faralateroside isomer2	21.36	C33H40O20	757.219	[M+H]+	-0.2	757.2223,611.1643,595.1504,449.1038,287.0541	Flavonoids	b	[27]
61	Chrysoeriol-7-O-β-D-glucoside+rutinoside	21.56	C34H42O20	771.234	[M+H]+	-0.8	771.2371,609.1651,463.1266,301.0704	Flavonoids	d
62	Isorhamnetin-3-O-rutinoside-7-O-glucoside+Hex	21.565	C40H52O26	949.3	[M+H]+	-0.2	787.2311,641.1716,625.1851,479.1189,317.0656	Flavonoids	d
63	Catechin	21.64	C15H14O6	335.077	[M+HCOO]-	0.7	335.0763,291.0954,210.9830,187.0003,182.9879,179.0375,161.0259,135.0457,133.0297,93.0326	Flavonoids	b	[16]
64	Isorhamnetin-3,7-diglucoside isomer1	21.65	C28H32O17	641.171	[M+H]+	0.3	479.1165,317.0656,85.0298	Flavonoids	c
65	Isorhamnetin-3-O-rutinoside-7-O-glucoside	22.17	C34H42O21	787.229	[M+H]+	0.4	787.2320,641.1720,625.1770,479.1179,317.0657	Flavonoids	b	[27]
66	Isorhamnetin-3,7-diglucoside isomer2	22.26	C28H32O17	641.171	[M+H]+	0.1	479.1148,317.0649,85.0234	Flavonoids	c
67	Narcissoside isomer1	23.08	C28H32O16	625.176	[M+H]+	0.5	479.1193,317.0674,285.0402,147.0649,129.0539,85.0276	Flavonoids	b	[18]
68	Quercitin 3-O-glucosylrutinoside	24.98	C33H40O21	773.213	[M+H]+	0.1	773.2125,611.1532,465.1021,303.0493,129.0521,85.0273	Flavonoids	c
69	Quercitin 3-O-glucosylrutinoside + rutinoside	24.99	C45H60O30	1081.32	[M+H]+	2.8	919.2777,773.2030,611.1576,465.1018,303.0503,139.0889	Flavonoids	d
70	Isoquercetin	25	C21H20O12	465.103	[M+H]+	0.4	303.0504,257.0452,229.0508,153.0182,85.0283	Flavonoids	b	[27]
71	Kaempferol-3-O-rutinoside-7-O-rhamnoside	25.1	C33H40O19	741.22	[M+H]+	-0.5	595.1413,449.0939,287.0550	Flavonoids	b	[18]
72	Rutin	25.57	C27H30O16	611.161	[M+H]+	0.8	611.1615,465.1034,303.0496,285.0414,257.0494,229.0494	Flavonoids	a
73	Quercetin-3-rutinoside-7-rhamnoside	25.6	C33H40O20	757.219	[M+H]+	0.3	611.1608,465.1032,449.1065,303.0499	Flavonoids	d
74	Quercitin-3-O-glucosylrutinoside + Rha	25.6	C39H50O25	919.271	[M+H]+	1.5	773.2271,611.1595,465.1063,4449.1009,303.0500	Flavonoids	d
75	Quercetin-3-rutinoside-7-rhamnoside + Rha	25.64	C39H50O24	903.276	[M+H]+	3.1	757.2279,595.1619,449.1092,303.0488	Flavonoids	d
76	Astragalin isomer1	25.66	C21H20O11	449.108	[M+H]+	-1.5	449.1042,303.0501,285.0433,229.0550,153.0178,85.0279	Flavonoids	b	[27]
77	Delphinidin	25.67	C15H11O7+	303.049	[M]+	0.2	303.0497,257.0444,229.0492,201.0541,165.0173,153.0179,137.0224,127.0533	Flavonoids	b	[18]
78	Delphinidin 3-O-b-glucoside	25.67	C21H21O12+	465.103	[M]+	-0.7	303.0495,229.0489,153.0182,85.0274	Flavonoids	b	[18]
79	Kaempferol-3-O-rutinoside isomer1	25.87	C27H30O15	595.166	[M+H]+	-9.2	595.1807,449.1056,287.0569	Flavonoids	b	[27]
80	Astragalin isomer2	26.53	C21H20O11	449.108	[M+H]+	0.4	287.0553,213.0510,165.0165,153.0197	Flavonoids	b	[27]
81	Tangeretin/ Sinensetin	26.04	C20H20O7	373.128	[M+H]+	0.4	357.0664,355.1113,325.1071,293.0793,219.0652,201.0539,173.0591,137.0587,73.0465	Flavonoids	b	[18]
82	Amurensin	26.09	C26H30O12	533.166	[M-H]-	0.6	533.1694,371.1141,353.1038,341.1034,279.0674,267.0663	Flavonoids	b	[11]
83	Quercetin	26.1	C15H10O7	303.05	[M+H]+	0.8	303.0521,257.0471,229.0510,165.0134,153.0184	Flavonoids	a
84	Brassicin isomer1	26.16	C22H22O12	479.11	[M+H]+	-0.6	317.0655,165.0170	Flavonoids	b	[18]
85	Isorhamnetin isomer	26.2	C16H12O7	317.066	[M+H]+	1.4	317.0671,302.0437,229.0501,165.0189,153.0183	Flavonoids	a
86	Syringetin-3-O-rutinoside	26.24	C29H34O17	655.187	[M+H]+	-2.7	655.3017,509.1370,347.0744,315.0516,155.0356	Flavonoids	b	[18]
87	Cyanidin-3-O-rhamnoside	26.64	C21H21O10	433.113	[M]+	-2.4	335.2733,287.0498	Flavonoids	d
88	Cyanidin 3-O-a-D-glucoside	26.65	C21H21O11+	449.1	[M]+	-0.9	287.0553,241.0408,213.0546,153.0148	Flavonoids	b	[18]
89	Kaempferol-3-O-rutinoside isomer2	26.65	C27H30O15	595.165	[M+H]+	0.6	595.1654,449.1089,287.0557,129.0532	Flavonoids	b	[27]
90	Kaempferol	26.67	C15H10O6	287.055	[M+H]+	0.9	213.0542,165.0161,253.0185,121.0260,93.0307	Flavonoids	a
91	Isorhamnetin	26.73	C16H12O7	317.066	[M+H]+	1.1	317.0649,302.030,274.0477,165.0157,153.0184	Flavonoids	a
92	Brassicin isomer2	26.79	C22H22O12	479.11	[M+H]+	-0.2	317.0655,165.0170	Flavonoids	b	[18]
93	Narcissoside isomer2	26.84	C28H32O16	625.176	[M+H]+	0.6	479.1193,317.0674,285.0402,147.0649,129.0539,85.0276	Flavonoids	b	[18]
94	Quercetin-3-O-(6''-feruloyl)glucoside-7-O-rutinoside + Hex	26.88	C49H58O29	1111.34	[M+H]+	0.8	949.2522,803.1993,641.1513,339.1042,321.0897,303.0458,177.0518	Flavonoids	d
95	Morachalcone A	26.9	C20H20O5	341.138	[M+H]+	-0.6	291.1026,259.0777,239.0697,217.0832,196.0558,137.0609,131.0565	Flavonoids	b	[18]
96	Quercetin-3-O-[2''-O-(6'''-sinapoyl)glucosyl]glucoside	27.03	C38H40O21	833.21	[M+H]+	0.7	671.1611,525.1619,369.1147,351.1013,303.0506	Flavonoids	b	[18]
97	Quercetin-3-O-(6''-sinapoyl)glucoside-7-O-rutinoside	27.06	C44H50O25	979.27	[M+H]+	0.5	833.2227,671.1635,465.0967,369.1132,303.0525	Flavonoids	b	[18]
98	Quercetin-3-O-(6''-feruloyl)glucoside-7-O-rutinoside	27.13	C43H48O24	949.26	[M+H]+	-1.7	803.2016,641.1517,339.1084,303.0502	Flavonoids	b	[18]
99	Quercetin-3-O-(6''-feruloyl)glucoside-7-O-glucoside	27.17	C37H38O20	803.224	[M+H]+	-1.7	785.1174,641.1501,339.0992,321.0788,303.0502,177.0524	Flavonoids	d
100	Nobiletin	29.09	C21H22O8	403.138	[M+H]+	-0.1	313.0968,301.1089,241.0824,239.0710,190.0587,187.0752,151.0408,145.0664	Flavonoids	b	[18]
101	1-methoxy-2-hydroxy-4-[5-(4-hydroxyphenoxy)-3-penten-1-ynyl] phenol	1.5	C18H16O4	295.096	[M-H]-	-5.6	277.0923,247.0810,205.0636,175.0481,132.0311,131.0467,113.0356	Phenolic acids	b	[17]
102	Quinic acid	1.72	C7H12O6	191.056	[M-H]-	0.9	191.0558,173.0445,127.0391,85.0288,73.0288	Phenolic acids	c
103	Shikimic acid	2.4	C7H10O5	173.046	[M-H]-	-1	154.9974,137.0242,111.0079,101.0230,93.0339	Phenolic acids	b	[18]
104	Protocatechuic acid	10.6	C7H6O4	153.019	[M-H]-	0.4	109.0313,91.0183,65.0043	Phenolic acids	c
105	Hydroxytyrosol	11.09	C8H10O3	153.056	[M-H]-	-0.1	153.0604,123.0469,122.0391,95.0173,77.0421,55.0206	Phenolic acids	c
106	Vanilic Acid	11.09	C8H8O4	169.05	[M+H]+	-1.1	151.0472,93.0337,81.0304,65.0369	Phenolic acids	b	[18]
107	Vanillic acid hexose	11.21	C14H18O9	331.102	[M+H]+	-0.7	331.1505,169.0500,125.0582,86.0986	Phenolic acids	b	[11]
108	Neochlorogenic acid	12.2	C16H18O9	353.088	[M-H]-	-0.6	335.1269,191.0565,179.0354,135.0446,127.0406,85.0288	Phenolic acids	a
109	Chlorogenic acid	12.72	C16H18O9	353.088	[M-H]-	-0.7	191.0559,179.0353,161.0248,135.0447,85.0292	Phenolic acids	a
110	P-Coumaric acid hexoside	13.45	C15H18O8	327.107	[M+H]+	4.9	281.1037,263.0924,201.0676,144.0428,110.0710.98.9844	Phenolic acids	b	[18]
111	P-Hydroxybenzoic acid	14.3	C7H6O3	137.024	[M-H]-	-0.3	137.024, 93.0360,65.0403	Phenolic acids	c
112	P-Coumaroylquinic acid	15.67	C16H18O8	339.107	[M+H]+	0.2	147.0432,119.0476,91.0529	Phenolic acids	b	[11]
113	Ferulic acid	16	C10H10O4	195.065	[M+H]+	0	177.0576,149.0599,145.0272,117.0334,89.0382	Phenolic acids	b	[4]
114	Caffeoyl hexose	16.12	C15H18O9	341.088	[M-H]-	0.1	179.0354,135.0449,79.0561	Phenolic acids	b	[4]
115	P-Coumaric acid	16.81	C9H8O3	163.04	[M-H]-	1	163.0414,119.0501,91.0539,65.0394	Phenolic acids	c
116	Cryptochlorogenic acid	17.48	C16H18O9	353.088	[M-H]-	-0.7	191.0564,179.0353,173.0459,135.0453,93.0341	Phenolic acids	a
117	Feruloylquinic acid isomer1	17.73	C17H20O9	369.118	[M+H]+	0.2	177.0547,149.0605,145.0281, 117.0327,89.0397	Phenolic acids	b	[11]
118	Caffeic acid	17.97	C9H8O4	179.035	[M-H]-	0.8	179.1088,135.0446,134.0377,89.0383	Phenolic acids	b	[16]
119	Benzoic acid	18.02	C7H6O2	121.03	[M-H]-	-0.3	93.0366,92.0278,77.0361,65.0444	Phenolic acids	c
120	Feruloylhexose isomer1	19.1	C16H20O9	355.103	[M-H]-	1	295.0829,235.0617,193.0511,175.0404,134.0369	Phenolic acids	b	[15]
121	Isoferulic acid	19.34	C10H10O4	195.065	[M+H]+	-0.9	177.0576,149.0599,145.0272,117.0334,89.0382	Phenolic acids	c
122	Feruloylhexosylhexose isomer 1	21.37	C22H30O14	517.156	[M-H]-	0.5	355.1058,337.0918,295.0825,235.0619,193.0513,175.0402,149.0614,134.0361	Phenolic acids	b	[15]
123	vanillin	21.8	C8H8O3	151.04	[M-H]-	-0.9	151.0399,136.015,108.0235,92.0287	Phenolic acids	c
124	Feruloylhexose isomer2	22.02	C16H20O9	355.103	[M-H]-	0.2	295.0829,235.0617,193.0511,175.0404,134.0369	Phenolic acids	b	[15]
125	Feruloylquinic acid isomer2	22.91	C17H20O9	369.118	[M+H]+	0.2	177.0547，145.0281，117.0327，89.0397	Phenolic acids	b	[11]
126	Asparoffin C	25.02	C20H22O4	327.159	[M+H]+	-1.3	295.1316,297.1171,274.1058,163.0729,137.0585,135.0798,98.9836	Phenolic acids	b	[17]
127	Feruloyl glycerol	25.06	C13H16O6	267.087	[M-H]-	0.6	252.0657,175.0416,160.0173,142.9937,133.0297	Phenolic acids	b	[11]
128	Sinapic acid	25.53	C11H12O5	223.061	[M-H]-	1.5	193.0149,165.0484,164.0484,149.0239,135.0448,121.0291,93.0330	Phenolic acids	b	[18]
129	Caffeoyltartaric acid	28.22	C13H12O9	311.041	[M-H]-	-7.4	290.9918,267.1153,237.1079,219.0923,202.0582,164.9977,124.0396	Phenolic acids	b	[15]
130	Dicoumaroyl glycerol	29.31	C21H20O7	385.128	[M+H]+	-1.0	367.1172,221.0820,147.0440,119.0486,91.0538	Phenolic acids	b	[11]
131	Coumaroyl feruloyl glycerol	29.42	C22H22O8	415.139	[M+H]+	-1.3	397.1315,221.0794,177.0541,147.0431	Phenolic acids	b	[11]
132	Diferuoloyl glycerol	29.52	C23H24O9	445.149	[M+H]+	-1.8	427.1350,251.0913,177.0538,149.0589,145.0279	Phenolic acids	b	[11]
133	Asparoffin D	30.31	C18H16O3	279.103	[M-H]-	3.8	264.0792,249.0564,238.9919,190.9944,171.0450,143.0527,117.0349	Phenolic acids	b	[17]
134	11-Hydroperoxy-octadecatrienoic acid	30.568	C18H30O4	309.207	[M-H]-	0.9	291.1975,209.1189,207.1390,185.1188,163.1130,121.1019,99.0807,83.0488,57.0337	Oxylipins	b	[11]
135	10-Hydroperoxy-octadecadienoic acid	30.74	C18H32O4	311.223	[M-H]-	2.8	293.2143,223.1722,201.1154,183.1406,171.1041,155.1089	Oxylipins	b	[11]
136	FA 18:2;4O	28.43	C18H32O6	343.213	[M-H]-	0	325.2102,289.1815,229.1409,171.1044,163.1141,95.0524	Oxylipins	e
137	FA 16:1;3O	28.708	C16H30O5	301.202	[M-H]-	0.36	265.1795,232.9829,201.1175,183.1042,139.1114,99.0809,59.0127	Oxylipins	e
138	FA 18:0;4O	28.941	C18H36O6	347.245	[M-H]-	1.37	329.2265,313.1220,306.9787,301.1192,283.1640,242.9905,241.1189,215.1397,201.1153,197.1266,171.1028,152.9942,141.0654,116.0704	Oxylipins	e
139	FA 22:6;4O	29.57	C22H32O6	391.217	[M-H]-	4.39	290.9890,266.9911,235.0081,216.9928,201.1130,171.0119,166.9914,159.0053,135.0075,78.9852	Oxylipins	e
140	FA 16:1;2O	29.652	C16H30O4	285.207	[M-H]-	0.31	264.9962,244.9876,216.9917,178.9933,169.1251,148.9877,128.9989,116.9915	Oxylipins	e
141	Dihydroxy-octadecanedioic acid	29.66	C18H34O6	347.243	[M+H]+	-0.3	347.2673，329.2158，293.2132，202.9845,139.1084	Oxylipins	b	[11]
142	FA 18:1;3O	29.898	C18H34O5	329.234	[M-H]-	1.03	311.2248,293.2138,275.2033,229.1464,211.1349,199.1348,197.1193,193.1248,183.1402,181.1243,169.1240,129.0926,127.0767,99.0812	Oxylipins	e
143	FA 18:3;2O	29.94	C18H30O4	309.207	[M-H]-	0.46	309.20849,291.1979,268.9922,251.1680,240.9933,204.9917,185.1248,171.1040,137.0969,71.0490	Oxylipins	e
144	FA 20:1;3O	30.128	C20H38O5	357.262	[M-H]-	2.93	336.9941,316.9864,311.2252,296.9942,292.9850,268.9835,266.9868,257.1751,240.9874,232.9898,216.9933,204.9892,199.1338,182.9892,161.0049,120.9918,92.9954	Oxylipins	e
145	FA 18:2;2O	30.223	C18H32O4	311.221	[M-H]-	1.34	293.2140,290.9890,270.9974,249.2235,211.1367,183.0106,171.1047,157.0852,153.1305,111.0796	Oxylipins	e
146	FA 16:2;O	30.341	C16H28O3	267.196	[M-H]-	0.79	247.0021,226.9980,216.9912,206.9885,198.0058,178.9929,167.0544,140.9946,128.9924,116.9966	Oxylipins	e
147	FA 16:0;2O	30.484	C16H32O4	287.223	[M-H]-	0.3	285.2030,269.2097,266.9902,251.19884,226.9963,216.9833,178.9913,171.1047,155.1075,127.1151,113.0940,78.9586	Oxylipins	e
148	Trihydroxy-octadecaecaenoic acid	30.65	C18H34O5	331.248	[M+H]+	0.5	331.3060,295.2231,277.2182,185.1150,147.1153,113.0988,98.9845	Oxylipins	b	[11]
149	FA 16:2;3O	30.671	C16H28O5	299.185	[M-H]-	0.91	281.1765,278.9861,257.1811,211.1368,167.1461,146.9875,92.9930,	Oxylipins	e
150	Trihydroxy-octadecadienoic acid	30.7	C18H32O5	329.232	[M+H]+	0.6	293.2160,275.2056，227.1779,174.9871,98.9831	Oxylipins	b	[11]
151	FA 20:3;3O	30.726	C20H34O5	353.232	[M-H]-	1.47	292.97119:20 ,335.2272,332.9870,313.0061,312.9787,292.9953,291.2289,272.9803,271.2311,266.9832,265.0005,248.9994,244.9896,228.9876,216.9876,171.1014	Oxylipins	e
152	FA 15:2;O	30.77	C15H26O3	253.181	[M-H]-	0.5	235.1711,232.9849,195.1392,171.1035,164.9952,128.9956,116.9960,97.0670,59.0142	Oxylipins	e
153	FA 15:0;2O	30.796	C15H30O4	273.207	[M-H]-	0.42	252.9890,233.0127,232.9868,204.9904,184.997,167.0073,116.9911	Oxylipins	e
154	FA 17:1;2O	30.833	C17H32O4	299.219	[M-H]-	3.6	278.9828,255.1934,218.9865,190.9961,129.0917,99.0798,92.9954	Oxylipins	e
155	FA 16:2;2O	30.867	C16H28O4	283.192	[M-H]-	0.15	282.9785,263.0101,243.0013,241.1801,167.1440,166.9944,116.9971	Oxylipins	e
156	FA 18:3;4O	30.877	C18H30O6	341.197	[M-H]-	0.4	320.9787,301.0191,300.9995,280.9873,272.9955,260.9992,254.9872,252.9845,233.0018,216.9889,204.9882,187.0976,171.1026,169.0844, 155.1074,125.0968,92.9937	Oxylipins	e
157	FA 18:1;2O	30.924	C18H34O4	313.24	[M-H]-	1.5	295.2268,277.2157,272.9910,195.1358,183.1389,129.0927,127.0745,99.0804	Oxylipins	e
158	FA 15:3;O	31.037	C15H24O3	251.165	[M-H]-	0.32	233.1550,230.9997,210.9994,140.9952,116.9959	Oxylipins	e
159	FA 15:1;2O	31.081	C15H28O4	271.192	[M-H]-	0.03	253.1852,252.3905,209.1924,204.9945,127.1084	Oxylipins	e
160	9,10-Dihydroxy-octadecenoic acid	31.12	C18H34O4	313.238	[M-H]-	2.6	295.2283,201.1145,171.1038	Oxylipins	b	[11]
161	12,13-Dihydroxy-octadecenoic acid	31.21	C18H34O4	315.253	[M+H]+	1	297.2562,279.2332,261.2225,243.2084,165.1254,149.1342,147.1186	Oxylipins	b	[11]
162	13-Hydroxy-octadecadienoic acid isomer1	31.25	C18H32O3	297.242	[M+H]+	-0.7	279.2319,261.2223,243.2114,177.1283,163.1466,147.1166,135.1156,121.1002,109.1002,95.0841,81.0688	Oxylipins	b	[11]
163	FA 20:5;3O	31.296	C20H30O5	349.198	[M-H]-	3.88	348.9932,328.9861,311.2263,278.9792,242.9906,240.9897,238.9992,192.9856,162.9899,142.9919,92.9993,68.9964	Oxylipins	e
164	FA 14:1;O	31.399	C14H26O3	241.181	[M-H]-	0.46	223.2063,220.9864,197.1943,173.0012,154.9968,153.0028,79.0028	Oxylipins	e
165	FA 18:3;3O	31.447	C18H30O5	325.201	[M-H]-	0.52	304.9809,293.1779,275.1719,249.1814,216.9955,183.0090,171.1050,153.0914,121.0311	Oxylipins	e
166	FA 18:4;O	31.539	C18H28O3	291.198	[M-H]-	1.44	273.1867,247.2059,245.1943,217.1658,204.9884,191.1444,165.1278,163.1146,148.0902	Oxylipins	e
167	FA 22:3;4O	31.614	C22H38O6	397.258	[M-H]-	1.89	379.2422,376.9772,356.9718,337.0165,336.9905,328.9830,311.1910,290.9936,267.1964,255.1583,240.9916,199.1318,179.1082,153.1286	Oxylipins	e
168	FA 17:4;O	31.615	C17H26O3	277.182	[M-H]-	1.01	256.9861,233.1922,205.1606,192.9958,59.0134	Oxylipins	e
169	FA 16:1;O	31.655	C16H30O3	269.212	[M-H]-	0.15	267.1954,251.2009,248.9792,228.9833,171.1030,155.1042,127.1122,113.0980	Oxylipins	e
170	15-Hydroperoxy-octadecatrienoic acid	31.73	C18H30O4	309.207	[M-H]-	1.9	291.1983,263.2019,247.2094,209.1205,171.1039,137.0982	Oxylipins	b	[11]
171	FA 16:0;O	32.017	C16H32O3	271.227	[M-H]-	1.16	142.99939:10 203.00648:10 253.22081:21 270.97931:31 271.22806:620	Oxylipins	e
172	FA 22:4;4O	32.038	C22H36O5	379.248	[M-H]-	0.88	318.9799,293.1744,290.9858,240.9820,197.1175,163.1154,92.9932	Oxylipins	e
173	9-Hydroxy-octadecadienoic acid	32.16	C18H32O3	295.228	[M-H]-	0.4	277.2173,195.1393,171.1030	Oxylipins	b	[11]
174	FA 18:0;3O	32.179	C18H36O5	331.249	[M-H]-	0.42	313.2417,310.9917,295.2188,290.9934,249.2203,241.2122,211.2093	Oxylipins	e
175	Oxo-octadecadienoic acid	32.43	C18H30O3	293.212	[M-H]-	3	275.2028,223.1710,195.1396,171.1044,167.1067	Oxylipins	b	[11]
176	FA 22:3;3O	32.498	C22H38O5	381.264	[M-H]-	0.12	340.9806,295.2037,277.1774,199.1352,197.1197,181.1243,179.1077,138.0707,71.0497	Oxylipins	e
177	FA 20:3;(2OH)	32.831	C20H34O3	321.242	[M-H]-	1.5	303.2442,293.2424,291.2246,275.2460,263.2320,73.0299,58.0066	Oxylipins	e
178	13-Hydroxy-octadecadienoic acid isomer2	33.06	C18H32O3	297.242	[M+H]+	-0.1	281.0484,279.2304,261.2213,243.2094,233.2175,165.1268,153.1268,145.1005,135.1158,95.0846,93.0700	Oxylipins	b	[11]
179	FA 15:0;(2OH)	33.416	C15H30O3	257.212	[M-H]-	0.03	239.2000,211.2048,209.1885,189.1624,151.0736,116.9307,99.9247,80.0284,71.0132	Oxylipins	e
180	FA 19:2;2O	34.721	C19H34O4	325.242	[M-H]-	3.91	304.9854,279.2281,253.2170,183.0071,89.0244,71.0138	Oxylipins	e
181	FA 19:1;2O	35.969	C19H36O4	327.256	[M-H]-	2.17	311.0264,295.0004,255.2338,235.0284,218.9985,206.9973,185.0091,161.0128,89.0240,74.9900	Oxylipins	e
182	PC 15:0	28.322	C23H46NO8P	496.303	[M+H]+	0.68	478.2870,437.2516,398.2530,344.1425,220.1330,184.0721,104.1046,86.0978	Glycerophospholipids	e
183	PC 18:0	30.383	C26H52NO8P	538.349	[M+H]+	1.65	520.3412,502.3328,446.2985,417.0342,357.0713,328.9637,281.0545,265.0234,209.0293,184.0726,147.0671,104.1062,73.0464	Glycerophospholipids	e
184	PC 18:0;2O|PC 10:0_8:0;2O	28.1537	C26H52NO10P	614.332	[M+HCOO]-	0.79	554.3159,483.2403,329.2357,171.203	Glycerophospholipids	e
185	PE 18:0;2O|PE 10:0_8:0;2O	28.1268	C23H46NO10P	526.278	[M-H]-	0.98	329.2357,171.1029,139.0764	Glycerophospholipids	e
186	LPA 10:0	24.815	C13H27O7P	325.142	[M-H]-	0.21	263.1485,221.1266,193.1355,176.1116,151.0501,133.0389,120.0471	LysoGPLs	e
187	LPA 15:2	28.755	C18H33O7P	391.189	[M-H]-	0.28	391.1862,373.1766,152.9936,96.9676,78.9587	LysoGPLs	e
188	LPA 22:6	27.937	C25H39O7P	481.235	[M-H]-	0.94	463.2170,389.1748,293.0042,171.0070,152.9959,78.9583	LysoGPLs	e
189	LPA 8:0	28.562	C11H23O7P	297.112	[M-H]-	0.61	297.1128,256.9976,228.9904,192.9859,152.9958,150.9787,78.9585	LysoGPLs	e
190	LPA 22:1	29.474	C25H49O7P	491.318	[M-H]-	3.63	473.3188,410.9891,366.9996,329.2728,303.0097,236.9905,203.0061,161.0177	LysoGPLs	e
191	LPA 18:2	30.128	C21H39O7P	433.236	[M-H]-	0.27	279.2330,271.0661,152.9957,96.9702,78.9590	LysoGPLs	e
192	LPA 16:0	31.939	C19H39O7P	409.236	[M-H]-	0.58	388.9823, 340.9753,302.9812,171.0063,152.9954,150.9988,78.9565	LysoGPLs	e
193	LPA 18:3	37	C21H37O7P	431.221	[M-H]-	-0.2	386.0147,295.2346,277.2171,174.9495,171.0056,152.9963,150.9795,96.9697,78.9588	LysoGPLs	e
194	LPA 18:1	37.035	C21H41O7P	435.25	[M-H]-	1.47	435.2527,258.8412,171.0161,152.9943,144.9234,101.9267,78.9571	LysoGPLs	e
195	LPC 7:0	27.345	C15H32NO7P	370.198	[M+H]+	0.97	352.1953,250.1449,198.1487,184.0742,124.9997,60.0800	LysoGPLs	e
196	LPC 20:5	28.069	C28H48NO7P	542.324	[M+H]+	0.37	498.3412,185.1003, 184.0835,127.0336,	LysoGPLs	e
197	LPC 28:5	28.885	C36H64NO7P	654.451	[M+H]+	1.83	636.4386,554.3282,424.2814,392.1631,326.2400,295.2441,227.1768,184.0701	LysoGPLs	e
198	LPC 28:1	30.103	C36H72NO7P	662.516	[M+H]+	3.85	644.3803,335.0493,332.2816,314.2670,268.2642,251.2388,212.2429,184.0704,72.0500	LysoGPLs	e
199	LPC 17:2	31.251	C25H48NO7P	506.325	[M+H]+	0.67	506.3181,401.9818,281.0580,184.0742,125.0027,104.1069	LysoGPLs	e
200	LPC 17:1	31.789	C25H50NO7P	508.338	[M+H]+	1.37	490.3210,314.2720,239.1187,184.0732,124.9961,104.1067	LysoGPLs	e
201	LPC 16:0	32.19	C24H50NO7P	496.34	[M+H]+	-0.5	478.3277,419.2554,313.2734,184.0722,124.9987,104.1056,86.0953	LysoGPLs	e
202	LPC 17:0	32.737	C25H52NO7P	510.351	[M+H]+	4.15	492.3397,401.2869,184.0659,166.0566,104.1058	LysoGPLs	e
203	LPC 18:0	34.664	C26H54NO7P	524.37	[M+H]+	1.09	506.3709,184.0737,125.0003,104.1078,86.0941,57.0704	LysoGPLs	e
204	LPC 8:0	28.3	C16H34NO7P	428.204	[M+HCOO]-	1.41	368.1845, 224.0675,143.1064	LysoGPLs	e
205	LPC 15:1	31	C23H46NO7P	524.301	[M+HCOO]-	1.34	464.2797,379.9825, 239.1977,224.0715,221.1874,152.9995	LysoGPLs	e
206	LPC 14:0	31.018	C22H46NO7P	512.299	[M+HCOO]-	0.73	452.2790,347.0105,256.0603,227.2028,224.0711,168.0435	LysoGPLs	e
207	LPC 18:3	31.113	C26H48NO7P	562.315	[M+HCOO]-	0.31	452.2790,451.9978,347.0105,256.0603,227.2028,224.0711	LysoGPLs	e
208	LPC 16:1	31.38	C24H48NO7P	538.314	[M+HCOO]-	1.22	478.2903,393.9947,373.9980,353.9878,253.2181,152.9978,116.0751,	LysoGPLs	e
209	LPC 15:0	31.547	C23H48NO7P	526.313	[M+HCOO]-	1.52	466.2989,426.0008,241.2200,224.0718,152.9953,78.9592	LysoGPLs	e
210	LPC 18:2	31.685	C26H50NO7P	564.329	[M+HCOO]-	1.41	504.3101,279.2335, 224.0693,168.0451,152.9976,78.9582	LysoGPLs	e
211	LPC 16:0	32.13	C24H50NO7P	540.33	[M+HCOO]-	0.31	480.3093,255.2334,224.0699,168.0438,152.9947,78.9598	LysoGPLs	e
212	LPC 18:1	32.479	C26H52NO7P	566.347	[M+HCOO]-	0.55	506.3288,476.9742,381.9903,281.2486,152.9915	LysoGPLs	e
213	LPE 14:0	30.969	C19H40NO7P	424.247	[M-H]-	0.15	343.9813,315.9973,279.9898,227.1983,217.0248,196.0403,153.0000,78.9587	LysoGPLs	e
214	LPE 18:3	31.052	C23H42NO7P	474.26	[M-H]-	2.96	453.9938,413.9925,329.9935,277.2159,253.2186,214.0523,196.0344,168.0439,78.9599	LysoGPLs	e
215	LPE 18:1	31.057	C23H46NO7P	480.307	[M+H]+	1.16	462.2940,308.2945,284.0729,125.0013,86.0958	LysoGPLs	e
216	LPE 16:1	31.294	C21H42NO7P	452.277	[M+H]+	0.21	434.2584,391.2196,336.2510,311.2558,278.2176,263.2384,174.1308,155.0067,121.0692,95.0834	LysoGPLs	e
217	LPE 15:0	31.514	C20H42NO7P	440.28	[M+H]+	2.44	405.2654,299.2602,140.0379,122.0242,120.0838	LysoGPLs	e
218	LPE 18:2	31.6	C23H44NO7P	476.279	[M-H]-	0.49	279.2317,196.0361,152.9928,140.0095,78.9596	LysoGPLs	e
219	LPE 16:0	32.028	C21H44NO7P	452.278	[M-H]-	0.49	452.2774,255.2332,196.0361,78.9597	LysoGPLs	e
220	LPG O-14:1	29.03	C20H41O8P	439.245	[M-H]-	1.58	418.9971, 378.9786,315.0353,246.9847,216.9896,165.0004,152.9956,78.9574	LysoGPLs	e
221	LPG 18:2	29.897	C24H45O9P	507.271	[M-H]-	1.5	279.2338,245.0440,227.0297,171.0070, 152.9944,78.9559	LysoGPLs	e
222	LPG O-15:3	30.877	C21H39O8P	449.232	[M-H]-	0.82	171.0063,152.9955,96.9675,78.9591	LysoGPLs	e
223	LPG O-15:4	31.171	C21H37O8P	447.215	[M-H]-	0.49	446.9970,406.9754,340.9816,302.9846,293.2119,171.0090,152.9963,96.9695,78.9584	LysoGPLs	e
224	LPG 16:0	31.783	C22H45O9P	483.273	[M-H]-	0.3	255.2318,227.0283,152.9962,78.9579	LysoGPLs	e
225	LPG O-17:3	32.837	C23H43O8P	477.261	[M-H]-	0.89	477.2528,416.9732,409.2393,376.9827,326.9758,279.2387,152.994, 78.9602	LysoGPLs	e
226	LPI 8:0	27.906	C17H33O12P	459.167	[M-H]-	3.51	279.1021,241.0117, 152.9954,143.1062, 78.9572	LysoGPLs	e
227	LPI 16:0	29.403	C25H49O12P	571.288	[M-H]-	0.61	409.23383,391.2248,315.0487, 255.2329, 241.0115, 171.0068, 152.9960, 78.9595	LysoGPLs	e
228	LPI 18:1	30.422	C27H51O12P	597.3	[M-H]-	4.02	435.2527,315.0436, 281.2498,241.0093,152.9943,78.9583	LysoGPLs	e
229	LPI 14:0	32.271	C23H45O12P	543.255	[M-H]-	2.44	542.9827,523.0179,522.9985,502.9868,482.9900, 482.9680,462.9762,442.9728, 414.9788,392.9955,376.9782,363.1966, 352.9771,340.9793,315.0494,266.9896,241.0056, 152.9931	LysoGPLs	e
230	LPI 18:3	32.684	C27H47O12P	593.273	[M-H]-	0.24	413.2051,315.0461,277.2177,241.0115,152.9960,78.9595	LysoGPLs	e
231	LPI 18:2	37.01	C27H49O12P	595.291	[M-H]-	0	530.9613,415.2266,355.6422,315.0485,279.2332,241.0127,152.9938, 78.9583	LysoGPLs	e
232	LPS 18:3	31.794	C24H42NO9P	518.25	[M-H]-	1.95	431.2155,429.9946,394.0051,349.9907,332.9932,279.2415,171.0078,152.9965,78.9580	LysoGPLs	e
233	LPS 18:2	37.039	C24H44NO9P	520.268	[M-H]-	0.25	433.2340,354.0008,279.2332,171.0051,152.9961,78.9585	LysoGPLs	e
234	ST 28:4;O	29.294	C28H42O	395.328	[M+H]+	2.47	377.3133,359.3015,321.0732,293.0845,250.0597,211.1468,171.1101,85.0627	Sterol Lipids	e
235	ST 27:2;O	30.281	C27H44O	367.334	[M+H-H2O]+	1.47	335.0886,293.2018,275.2049,257.1937,221.0102,179.1025,177.1212,161.0913,93.0692,67.0514	Sterol Lipids	e
236	Linoleoylgalactopyranosyl glycerol	31.83	C27H46O9	513.307	[M-H]-	0	472.9883,392.9972,277.2178,253.0941,161.0466	Glyceroglycolipids	b	[11]
237	Linoleoyldigalactopyranosyl glycerol	31.98	C33H56O14	677.374	[M+H]+	-5	677.3719,515.3173,347.0999	Glyceroglycolipids	b	[11]
238	MG 18:2	34.06	C21H38O4	355.284	[M+H]+	0	337.2739,281.2483,265.2516,263.2362,245.2253,175.1469,163.1473,95.0848	Glycerolipids	e
239	MG 16:0	34.81	C19H38O4	331.284	[M+H]+	-0.5	313.2744,257.2496,239.2363,165.1679,109.1011,95.0840	Glycerolipids	e
240	FA 9:1;O2	27.39	C9H16O4	187.098	[M-H]-	1.3	169.0894,143.1080,125.0971,123.0817,97.0676	Fatty Acyls	e
241	FA 15:4	32.403	C15H22O2	233.155	[M-H]-	0.71	233.1548,217.1262,134.8895	Fatty Acyls	e
242	FA 19:3	32.703	C19H32O2	291.234	[M-H]-	0.76	291.2299,273.2263,263.2380,167.0001,155.1450,123.0819,84.0212	Fatty Acyls	e
243	FA 15:3	32.73	C15H24O2	235.171	[M-H]-	0.19	234.9772,220.1475,199.8524,192.1170,177.0876,168.9902,160.0886,134.8950,99.9247	Fatty Acyls	e
244	FA 12:0	32.925	C12H24O2	199.169	[M-H]-	1.33	199.1726,128.9958,99.9315,68.9958,58.9927	Fatty Acyls	e
245	FA 16:3	32.936	C16H26O2	249.186	[M-H]-	0.49	221.15179:10 247.16591:10 249.18558:71	Fatty Acyls	e
246	FA 14:1	33.23	C14H26O2	225.187	[M-H]-	1.27	225.1834,208.9825,178.9271,149.0053,134.9684,134.9603,74.9896,59.9653	Fatty Acyls	e
247	FA 17:1	33.23	C17H32O2	267.233	[M-H]-	3	267.2302,237.2395,223.1730,211.2003,195.0658,167.1073,139.0808,125.0606,84.0242	Fatty Acyls	e
248	FA 18:0	33.33	C18H36O2	283.266	[M-H]-	1.5	282.37582:3 283.2663, 282.9978,266.9613,208.9758	Fatty Acyls	e
249	FA 18:3	33.891	C18H30O2	277.218	[M-H]-	0.7	259.2040,241.1992,233.2306,205.1604,205.1947,181.1282,161.0995,135.0423,127.0800,83.0515	Fatty Acyls	e
250	FA 15:1	33.962	C15H28O2	239.203	[M-H]-	0.94	239.2035,223.0298,206.9995,149.0092, 91.0219,74.9903,59.9670	Fatty Acyls	e
251	FA 17:2	34.085	C17H30O2	265.218	[M-H]-	0.36	221.1531,96.9609	Fatty Acyls	e
252	FA 14:0	34.13	C14H28O2	227.202	[M-H]-	3	208.9769,194.9262,178.9284,134.9565,92.9913	Fatty Acyls	e
253	FA 16:1	34.36	C16H30O2	253.218	[M-H]-	0.67	197.1846,253.2194	Fatty Acyls	e
254	FA 18:2	34.67	C18H32O2	279.233	[M-H]-	2.8	261.2239,166.9907,137.0971	Fatty Acyls	e
255	FA 15:0	34.79	C15H30O2	241.219	[M-H]-	1.88	225.0287,223.0252,149.0108,74.9915,59.9647	Fatty Acyls	e
256	FA 16:0	35.54	C16H32O2	255.233	[M-H]-	2.1	237.2245,220.1438,180.9251,165.0570	Fatty Acyls	e
257	FA 18:1	35.81	C18H34O2	281.249	[M-H]-	0.8	237.1457,219.1812,195.1368,169.1588,137.1002,83.0513,57.0349	Fatty Acyls	e
258	Oleamide	33.47	C18H35NO	282.279	[M+H]+	-0.5	282.2798,265.2525,247.2427,135.1173,121.1015,114.0892, 95.0836	Fatty Acyls	c
259	Erucamide	34.51	C22H43NO	338.342	[M+H]+	0.2	338.3413,321.3144,303.3025,177.1651,149.1314	Fatty Acyls	c
260	NAGly 12:0	29.37	C14H27NO3	256.193	[M-H]-	0.98	216.9887,195.9961,171.9931,155.1398,100.0399,82.0307,58.0290	Fatty acyls	e
261	NAGly 18:2;O	31.128	C20H35NO4	352.248	[M-H]-	1.01	351.1000,332.9919,312.0050,292.0001,272.2316,241.9929,96.9618,74.0261	Fatty acyls	e
262	AAHFA 18:0;O|AAHFA 7:0/11:0;O	31.134	C18H34O4	313.237	[M-H]-	0.97	311.2229,295.2285,277.2185,213.1495,201.1140,195.1400,183.1395,171.1029,129.0922,127.0761,99.0809	Fatty acyls	e
263	FAHFA 18:3;O|FAHFA 2:0/16:3;O	31.231	C18H28O4	307.19	[M-H]-	1.89	289.1821,265.1823,221.1908,216.9854,209.1171,193.0839,171.1020,165.1278,151.1118,149.0965,113.0968	Fatty acyls	e
264	NAGly 18:0;O	32.008	C20H39NO4	356.28	[M-H]-	0.73	338.2356,312.2548,296.2315,278.2207,265.2182,253.2171,227.2011,146.0473,139.1107,128.0353,102.0558	Fatty acyls	e
265	NAGly 16:0;O	32.483	C18H35NO4	328.248	[M-H]-	1.44	328.2552,312.8435,284.2185,266.2129,238.2167,116.0412,74.0237	Fatty acyls	e
266	NAGly 20:2;O	33.114	C22H39NO4	380.281	[M-H]-	0.06	336.2495,318.2389,290.2322,74.0230,72.0501	Fatty acyls	e
267	5-hydroxyaspastipuline isomer1	6.92	C15H13N2O2	252.09	[M-H]-	-7.8	180.0669,163.0401,119.0505,93.0346,72.0090	Alkaloids	b	[10]
268	5-hydroxyaspastipuline isomer2	15.93	C15H13N2O2	252.09	[M-H]-	-6.5	208.0998,180.0674,163.0414,136.0762,119.0502,88.0409	Alkaloids	b	[10]
269	Aspastipuline isomer1	24.1	C15H13N2O	236.096	[M-H]-	-7.3	192.1110,164.0717,147.0461,103.0545,88.0396	Alkaloids	b	[10]
270	Aspastipuline isomer2	25.48	C15H13N2O	236.096	[M-H]-	-7.3	192.1061,164.0720,147.0460,91.0562,88.0420	Alkaloids	b	[10]
271	Lysine	1.34	C6H14N2O2	145.098	[M-H]-	-0.4	127.0508,109.0410,101.0729,84.0450,74.0246,67.0300	Amino acids, peptides and derivatives	b	[4]
272	L-Threonine/L-Homoserine	1.4	C4H9NO3	120.06	[M+H]+	-2.5	103.0534,102.0452,93.0689,91.0538,77.0381	Amino acids, peptides and derivatives	b	[4]
273	Histidine	1.41	C6H9N3O2	154.062	[M-H]-	2.7	137.0359,188.0401,110.0723,93.0455,81.0447,67.0287	Amino acids, peptides and derivatives	b	[4]
274	Aspartic acid	1.42	C4H7NO4	132.03	[M-H]-	-0.3	132.0307,115.0025,71.0134	Amino acids, peptides and derivatives	c
275	Serine	1.44	C3H7NO3	104.035	[M-H]-	-1.8	104.0412,74.0259,72.0169	Amino acids, peptides and derivatives	b	[4]
276	Asparagine	1.45	C4H8N2O3	131.046	[M-H]-	-0.2	114.0199,113.0358,95.0258,72.0092,70.0298	Amino acids, peptides and derivatives	b	[11]
277	L-Arginine	1.453	C6H14N4O2	175.11	[M+H]+	0.4	130.0971,70.0643	Amino acids, peptides and derivatives	c
278	L-glutamic acid	1.515	C5H9NO4	146.04	[M-H]-	0.9	146.0683,110.0475,102.0589,85.0345	Amino acids, peptides and derivatives	b	[4]
279	N-Monomethyl-L-arginine	1.587	C7H16N4O2	189.13	[M+H]+	-1.5	144.1123,74.0701,70.0642,57.0435	Amino acids, peptides and derivatives	b	[4]
280	Glutamine	1.6	C5H10N2O3	145.062	[M-H]-	0.2	127.0502,109.0398,101.0711	Amino acids, peptides and derivatives	b	[4]
281	L-Proline	1.748	C5H9NO2	116.07	[M+H]+	-0.7	70.0651	Amino acids, peptides and derivatives	c
282	L-valine	2.25	C5H11NO2	118.086	[M+H]+	-4.6	118.0826,73.0857,72.0804,59.0490,57.0572,55.0542	Amino acids, peptides and derivatives	c
283	Pipecolic acid	2.44	C6H11NO2	130.086	[M+H]+	-2.6	130.0856,84.0801,67.0535	Amino acids, peptides and derivatives	c
284	5-Oxo-L-Proline	3.829	C5H7NO3	128.03	[M-H]-	0.9	82.0297,52.0189	Amino acids, peptides and derivatives	b	[4]
285	Isoleucine	5.63	C6H13NO2	132.102	[M+H]+	-3.2	86.096170.0641,69.0693,58.0647	Amino acids, peptides and derivatives	b	[11]
286	L-Tyrosine	5.69	C9H11NO3	180.067	[M-H]-	1.1	163.0427，134.0636,119.0521,93.0353	Amino acids, peptides and derivatives	b	[11]
287	Oxiglutatione	6.786	C20H32N6O12S2	611.14	[M-H]-	-0.6	593.1409,482.1080,306.0775,272.0889,254.0784,179.0468,143.0459	Amino acids, peptides and derivatives	b	[4]
288	Leucine	7.1	C6H13NO2	130.087	[M-H]-	0.1	130.0903,113.0666,84.0834	Amino acids, peptides and derivatives	b	[11]
289	L-(Iso)leucine-hexose	7.12	C12H23NO7	294.155	[M+H]+	0.3	294.1067,132.1018,86.0960	Amino acids, peptides and derivatives	b	[11]
290	Phenylalanine	8.75	C9H11NO2	166.086	[M+H]+	-1.7	166.0875,120.0800,103.0532,91.0529,77.0378	Amino acids, peptides and derivatives	c
291	L-Glutamic-L-alanine-L-valine	8.79	C13H23N3O6	318.166	[M+H]+	0.5	318.1517,229.1207,189.1176,72.0809	Amino acids, peptides and derivatives	b	[11]
292	L-Glutamic acid-L-valine	8.81	C10H18N2O5	247.129	[M+H]+	1	247.1296,230.1207,184.0980,130.0581,118.0854,84.0438,72.0801	Amino acids, peptides and derivatives	b	[11]
293	L-Phenylalanine-hexose	9.64	C15H21NO7	328.139	[M+H]+	0.7	328.1287,166.0874,120.0811	Amino acids, peptides and derivatives	b	[11]
294	L-Prolyl-L-Leucine	11.672	C11H20N2O3	229.15	[M+H]+	-0.5	116.0748,70.0647	Amino acids, peptides and derivatives	b	[4]
295	L-Tryptophan	12.8	C11H12N2O2	203.083	[M-H]-	2.4	203.0842,186.0597,159.0949,142.0664,130.0669	Amino acids, peptides and derivatives	c
296	L-Aspartyl-L-Phenylalanine	13.34	C13H16N2O5	281.11	[M+H]+	1.7	235.1081,166.0856,120.0798,103.0541	Amino acids, peptides and derivatives	b	[4]
297	L-Glutamic acid-L-leucine	13.65	C11H20N2O5	261.144	[M+H]+	0.6	261.1438,244.1217,198.1109,132.1015,86.0957	Amino acids, peptides and derivatives	b	[11]
298	L-Prolyl-L-Phenylalanine	14.883	C14H18N2O3	263.13	[M+H]+	0.4	166.0855,120.0808,70.0647,68.0501	Amino acids, peptides and derivatives	b	[4]
299	L-Valyl-L-Phenylalanine	17.76	C14H20N2O3	265.155	[M+H]+	0.8	265.1500,249.0012,166.0861,120.0798,72.0804	Amino acids, peptides and derivatives	b	[4]
300	Asparagusic acid	22.32	C4H6O2S2	148.974	[M-H]-	-0.8	104.9866,79.9423,63.9440	Amino acids, peptides and derivatives	b	[11]
301	N-Acetyl-L-phenylalanine	23.022	C11H13NO3	206.08	[M-H]-	0.4	164.0721,147.0450,103.0551,91.0550	Amino acids, peptides and derivatives	b	[4]
302	Gluconic acid	1.54	C6H12O7	195.051	[M-H]-	0.9	177.0414,159.0303,129.0191,99.0090,75.0084	Carbohydrates	b	[11]
303	Xylonic/arabinonic/ribonic acid	1.54	C5H10O6	165.04	[M-H]-	2.6	147.0333,129.0213,99.0120,75.0097,5930148	Carbohydrates	b	[15]
304	D-(+)Glucose/ fructose	1.62	C6H12O6	179.056	[M-H]-	0.7	179.05556,161.0453,119.0356,115.0391,101.0236	Carbohydrates	c
305	Sedoheptulose isomer1	1.74	C7H14O7	209.067	[M-H]-	3	159.0308,141.0190,129.0194,111.0088,85.0295	Carbohydrates	b	[15]
306	Sucrose	1.75	C12H22O11	341.109	[M-H]-	-1	341.1096,179.0568,119.0353,101.0247	Carbohydrates	c
307	Sedoheptulose isomer2	2.07	C7H14O7	209.067	[M-H]-	1	159.0305,141.0178,129.0201,85.0295	Carbohydrates	b	[15]
308	1-Kestose/ Neokestose	2.87	C18H32O16	503.162	[M-H]-	-1.3	503.1620,341.1105,179.0569,161.0444,119.0341	Carbohydrates	c
309	Nystose	6.88	C24H42O21	665.215	[M-H]-	0.9	665.2163,503.1619,341.1092,179.0546	Carbohydrates	c
310	Glucose linolate	32.84	C24H42O7	441.286	[M-H]-	-0.1	321.2480,279.2322,143.0388	Carbohydrates	b	[13]
311	Threonic acid	4.25	C4H8O5	137.044	[M+H]+	5.8	119.0345,110.0343,93.0091,82.0394,67.0290	Carbohydrates	b	[15]
312	Secoisolariciresinol hexose isomer1	24.86	C26H36O11	523.218	[M-H]-	-0.5	361.1662,346.1429,179.0718,165.0558	Lignans and norlignans	b	[11]
313	Secoisolariciresinol hexose isomer2	26.48	C26H36O11	523.218	[M-H]-	1.6	361.1657,346.1430,179.0721,165.0552	Lignans and norlignans	b	[11]
314	Hinokiresinol	30.42	C17H16O2	251.108	[M-H]-	4.3	235.0760,210.9963,190.9920,157.0693	Lignans and norlignans	b	[11]
315	Cytidine	2.78	C9H13N3O5	244.093	[M+H]+	0.8	244.1213,112.0497,95.0242,69.0442	Nucleosides	c
316	Adenine	7.23	C5H5N5	136.062	[M+H]+	-4.4	136.0633,119.0348,94.0410,92.0251,65.0137	Nucleosides	c
317	Guanosine	7.52	C10H13N5O5	284.099	[M+H]+	-0.8	152.0561,135.0298,110.0342	Nucleosides	c
318	Guanine	7.54	C5H5N5O	152.057	[M+H]+	-1.1	135.0299,110.0347,107.0348,80.0242,65.0130,53.0130	Nucleosides	c
319	Uridine	6.18	C9H12N2O6	243.062	[M-H]-	1.7	243.0636,200.0571,152.0358,110.0249,82.0296	Nucleosides	c
320	Adenosine	7.3	C10H13N5O4	266.089	[M-H]-	1	266.0903,134.0470,107.0359,92.0256	Nucleosides	c
321	2-Hydroxyadenosine	7.56	C10H13N5O5	282.084	[M-H]-	1	282.0851,150.0423,133.0155,107.0364	Nucleosides	c
322	Nicotinic acid	3.17	C6H5NO2	124.039	[M+H]+	-3.9	124.0381,106.0283,80.0492,78.0332,53.0382,52.0179	Organic acids	c
323	Fumaric acid/ Maleic acid	1.89	C4H4O4	115.004	[M-H]-	0	115.0108,97.9306,71.0160	Organic acids	c
324	Malic acid	1.9	C4H6O5	133.014	[M-H]-	0.7	133.0141,115.0032,72.9924,71.0132	Organic acids	c
325	Citric acid	3.48	C6H8O7	191.02	[M-H]-	0.6	191.0206,173.0103,154.9992,147.0289,111.0090,87.0086	Organic acids	c
326	Amber acid	4.84	C4H6O4	117.019	[M-H]-	-1.6	117.0196,99.0085,73.0293,55.0185	Organic acids	c
327	Mevalonic acid	7.75	C6H12O4	147.066	[M-H]-	0.8	147.0707,101.0646,75.0094,72.9942,56.9986	Organic acids	b	[18]
328	Cinnamic acid	8.6	C9H8O2	147.045	[M-H]-	-3.7	103.0665,77.0401,72.9914,58.9600	Organic acids	c
329	Ascorbic acid	5.27	C6H8O6	175.025	[M-H]-	0.7	157.0148,131.0349,113.0234,87.0448	Organic acids	b	[4]
330	Abscisic acid	28.59	C15H20O4	263.129	[M-H]-	2.4	219.1396,204.1150,203.1081,153.0918,125.0606,122.0372	Organic acids	b	[4]
331	Nicotinamide	3.72	C6H6N2O	123.055	[M+H]+	-4.0	123.0543,106.0286,78.0336,53.0383,51.0228	Other compounds	c
332	Pantothenic acid	10.62	C9H17NO5	220.118	[M+H]+	1	220.1190,202.1075,184.0966,142.0844,124.0759,98.0234	Other compounds	b	[11]
333	Asparaptine	12.33	C10H18N4O3S2	307.089	[M+H]+	0.8	290.0628,273.0361,248.0410,247.0567,229.1298,212.1031,170.0810,104.9823	Other compounds	b	[19]
334	Vitamin B2	21.38	C16H24O10	377.145	[M+H]+	3.3	377.1465,243.0889,172.0870,69.0315	Other compounds	c
335	Coumarin	23.73	C9H6O2	147.044	[M+H]+	-1.2	147.0468,119.0489,91.0534,75.0197,65.0383	Other compounds	c
336	Trimethoxystilbene hexose	26.21	C23H28O9	449.181	[M+H]+	-5	449.1799，287.1235	Other compounds	b	[11]
337	Sedanolide	29.47	C12H18O2	195.138	[M+H]+	-1.7	195.1415,163.0395,149.1274,135.0450,93.0700,91.0525	Other compounds	c
338	Dihydroactinidiolide	30.27	C11H16O2	181.122	[M+H]+	1	145.0991,135.1171,121.0633,107.0858,93.0684	Other compounds	b	[4]
339	Diisobutyl phthalate	32.96	C16H22O4	279.159	[M+H]+	-1.6	261.2191,243.2098,187.1458,149.0223,121.0277,93.0331,65.0379	Other compounds	b	[4]
340	P-Hydroxybenzaldehyde	17.96	C7H6O2	121.03	[M-H]-	-0.3	121.0309,92.0274,65.0398	Other compounds	c
341	Shatavarol	26.6	C17H18O4	285.113	[M-H]-	1.8	225.0928,223.0770,164.0469,131.0499,119.0497,93.0342,59.0126	Other compounds	b	[25]
342	Gobicusin B	31.34	C19H18O4	279.103	[M-H]-	-0.4	264.0819,206.0780,171.0459,143.0510,123.0476,108.0225	Other compounds	b	[17]
Annotation:
a: Identified by comparing MS data with the standards;
b: Identified by comparing with the MS data from references;
c: Identified by comparing with the MS data from Sciex OS 2.0 library;
d: Identified by comparing with with the MS data from GNPS;
e: Identified by comparing with with the MS data from the Lipid database of MS-Dial.

## Sheet: Table S2
Table S2. The peak areas, P values, Fold changes and VIP values of 327 metabolites between edible and inedible parts of white asparagus.
Number	Type	WA_IE1	WA_IE2	WA_IE3	WA_IE4	WA_IE5	WA_IE6	WA_IE7	WA_IE8	WA_E1	WA_E2	WA_E3	WA_E4	WA_E5	WA_E6	WA_E7	WA_E8	P values	Fold changes	VIP values
1	Steroidal saponins	3880.74	2766.22	5206.18	3448.66	3362.58	5871.31	4777.98	4107.89	57547.4	73236.6	66660.4	63268.2	63750.6	55201.8	32277.6	30077.1	3.76896e-05	0.075611	2.44836
2	Steroidal saponins	10418	7582.59	11053	9518.34	5696.22	8282.64	8609.35	6221.81	19348.6	20051.9	30104.5	17720.5	19910.7	18078.2	15689	22800.5	4.32445e-05	0.411608	1.13006
3	Steroidal saponins	74646.4	71060.1	83090.5	66194.8	61766.7	79333.4	72848.1	51862.6	35604.2	63989.8	36905.1	27246.1	38466.8	30666.6	76964.9	69198.2	0.0140727	1.47953	1.3796
4	Steroidal saponins	113611	100767	110818	115309	101826	115337	96632.4	87347.6	81992.7	177509	104481	73292.6	131400	84920.3	202558	166668	0.241089	0.822868	1.01578
5	Steroidal saponins	77231	67508.9	88744.6	65093.5	67588.7	70029.8	73590.6	59694.9	63407.7	58739.3	31842.3	19116.9	34858.1	13817.1	117460	75721.4	0.162508	1.37237	1.22851
6	Steroidal saponins	93781.3	285720	97683.8	210216	103796	312439	147594	143578	506489	362921	68196.8	108442	257994	112401	274807	1.28711e+06	0.207754	0.468314	3.96987
7	Steroidal saponins	19610.5	34333.1	26126.3	24100.7	23403.5	27146.2	37772.2	36515.3	85581.7	44082.2	17539.8	55873	74019.6	36871.8	76822.3	145774	0.0273093	0.426804	1.95168
8	Steroidal saponins	270545	210672	152943	390319	200230	246926	234872	205044	110847	129327	74884.2	55391	105922	60930.5	152987	270077	0.00432152	1.99044	3.20487
9	Steroidal saponins	24301.3	8068.06	73443.4	30181.5	34261.9	40687.5	35582.8	32885.5	55089.7	77465.8	60471.1	48189.6	59768.6	54716.4	163416	108712	0.0177962	0.445044	1.99797
10	Steroidal saponins	139714	137249	176050	173969	121959	254123	168374	185516	1.18208e+06	776311	438082	544372	1.36839e+06	497512	1.40966e+06	3.50332e+06	0.0215775	0.139608	10.1554
11	Steroidal saponins	378679	276050	326442	94679.4	262902	241018	299871	256356	364826	298401	189209	147209	286707	156179	440938	521711	0.561477	0.888082	2.01845
12	Steroidal saponins	20953.9	12273	18055.4	48841.6	15327.7	17633	14372	18848.7	86863.4	70687.4	125462	50094.3	62366.9	56140	194356	169714	0.00392491	0.203884	2.89652
13	Steroidal saponins	2.6785e+06	3.05287e+06	3.25387e+06	4.1086e+06	3.05612e+06	3.78687e+06	3.26079e+06	2.74288e+06	4.17398e+06	4.90117e+06	3.5928e+06	3.31784e+06	4.24917e+06	3.0998e+06	5.64076e+06	6.32505e+06	0.0245424	0.734846	9.83608
14	Steroidal saponins	886427	862430	784750	1.34322e+06	801922	1.21919e+06	853391	1.01291e+06	476520	575181	349141	326087	584000	298050	896447	1.13855e+06	0.00977089	1.6719	6.02218
15	Steroidal saponins	174220	215087	164528	257515	177484	301467	182530	228585	227972	187726	94033.8	108496	223834	104141	258016	466790	0.936418	1.0182	1.94703
16	Steroidal saponins	350637	359188	365777	506544	308549	482665	417701	490840	2.02664e+06	1.38641e+06	778186	1.36304e+06	1.90617e+06	1.07788e+06	1.84402e+06	2.49574e+06	0.000465544	0.254844	9.20743
17	Steroidal saponins	414779	334320	401591	561397	416472	423984	439152	394400	225336	200676	152738	116159	211500	94955.2	170020	259858	1.28599e-06	2.36584	5.12623
18	Steroidal saponins	2.55819e+06	2.29339e+06	2.58285e+06	3.01847e+06	2.48711e+06	2.43846e+06	2.4455e+06	2.27719e+06	1.51877e+06	2.61683e+06	1.41719e+06	1.2402e+06	2.03615e+06	1.1553e+06	2.88722e+06	3.69595e+06	0.222939	1.21328	5.6285
19	Steroidal saponins	496377	631072	627785	755802	639447	769262	698729	653264	541054	598737	490079	1.1405e+06	559843	1.06947e+06	666773	1.2083e+06	0.288937	0.84015	2.82355
20	Steroidal saponins	103211	100977	96632.4	100708	84213.4	106645	111092	93445.6	193112	192133	172202	96217.3	147965	146516	250640	438633	0.0249821	0.486696	3.19116
21	Steroidal saponins	98754.2	157423	100511	91295.2	88666.8	245494	126080	113340	96848.3	127563	38948.3	41221.8	93629.2	34094.3	72165.4	249641	0.304067	1.35466	1.40874
22	Steroidal saponins	620954	939480	832292	1.20539e+06	536465	1.1259e+06	916060	945726	3.12613e+06	2.01595e+06	1.13202e+06	1.84673e+06	2.45748e+06	1.43913e+06	2.99033e+06	4.93711e+06	0.00691959	0.357097	12.7485
23	Steroidal saponins	15114.4	14339.3	15425.6	17032.4	15671.2	16104.1	14739	12012.7	46586.1	59483	35701.2	38259.3	46786.3	39656.4	77610.1	91249.9	0.000888937	0.27666	1.61491
24	Steroidal saponins	8197.16	8888.91	8730.95	10576.8	8778.99	10388.6	9508.19	9290.27	12425	16096.1	11163.3	17355.2	13374.2	8347.41	20557.6	26668.2	0.0164283	0.590219	0.77411
25	Steroidal saponins	46445.9	24500.4	47811.9	32843	29858.6	32230.3	41461.2	24524.8	48043.1	38346.5	58755.8	17197.2	59283.5	21192.7	34281.3	84567.7	0.258469	0.773295	0.725835
26	Steroidal saponins	18961.9	20368.1	26169.7	27102.9	18807.7	37029.1	31306.9	26363.7	43101.2	23381.6	12555.8	19894.2	36561.3	16847	44466.1	90313.2	0.301115	0.717852	1.14663
27	Steroidal saponins	141824	92928.2	87748.1	102024	100425	96758	95087.5	85084.4	901831	1.10492e+06	823755	446749	630738	875986	1.20075e+06	1.27038e+06	8.08089e-05	0.110526	9.41914
28	Steroidal saponins	187143	213630	208547	262685	196382	235529	205866	180228	96939.4	84189.3	62312.5	60958.2	74022.1	42321.7	102158	118674	8.78065e-08	2.63415	3.83725
29	Steroidal saponins	247987	302706	261542	331022	251456	290584	270379	207367	121820	118662	95979.2	77611	77271.4	74677.3	116444	145453	1.99766e-07	2.61263	4.32833
30	Steroidal saponins	147458	159390	151464	178595	124686	142704	139750	106619	168801	203154	154730	127114	91054.5	144726	353257	237540	0.203833	0.777279	1.72533
31	Steroidal saponins	106008	493894	106955	128840	97752.3	499703	498487	84285.7	55215.1	60061.7	50467.9	29753.3	53384.4	31610.6	252714	69509.7	0.0469119	3.34473	3.49143
32	Steroidal saponins	98832.3	108977	153549	182390	121778	158679	145036	121267	74709.9	42407.6	24938.8	49493.3	59266.3	38530.5	80363.3	139082	0.000541554	2.14333	2.72808
33	Steroidal saponins	71854	41808.5	57103.8	49270.7	67592.1	49311.8	47458	55286.6	223652	300836	255628	92733.6	202475	216378	613846	586749	0.00615495	0.176418	5.11874
34	Steroidal saponins	23882.3	24293.3	27064.6	25645.5	23699.2	24784.3	28148.9	23172.8	3449.36	2985.08	3045.23	4178.3	2185.4	2817.04	2590.33	3392.6	1.76383e-10	8.14382	1.61086
35	Steroidal saponins	29462	27394.2	31580.8	29614	47268.4	29077	27273.7	26241.5	29403.7	30533.4	26373.1	20004.3	23704.9	20281.9	56405	33687.2	0.847744	1.03127	0.427862
36	Steroidal saponins	64286.6	98336.3	104521	94794.5	57292.2	63283.9	59320.3	50044.5	8091.84	4181.98	6135.21	3384.89	3740.46	3726.57	6103.16	5051.33	3.85122e-05	14.6449	2.77675
37	Steroidal saponins	51677.6	75240.9	77085.5	80723.5	56731.3	74088.6	62610.6	56176.6	47759.4	33310.7	8989.34	29735.9	40000.1	10118.8	27504.9	51951.2	0.000185764	2.14274	1.86864
38	Steroidal saponins	154489	174990	134845	253094	137433	128895	104628	114410	7790.6	10727.9	6931.24	3674.64	10954.1	4182.06	6455.98	7605.88	5.50187e-05	20.623	3.98576
39	Steroidal saponins	88004.9	182652	107305	182485	118883	161751	120980	115726	51760.3	62495	8467.43	19050.5	46408.8	13186.4	28724.5	79053.8	3.83934e-05	3.48633	3.13018
40	Steroidal saponins	279011	226827	275925	332892	271307	326828	280365	297797	561100	237464	78040.5	288012	499064	104744	305678	616405	0.51361	0.851494	1.95685
41	Steroidal saponins	632320	652936	389700	818432	533664	412467	353454	451728	53719.9	155092	30743.2	28851.6	30544	10428.9	11336.1	14550.8	2.88905e-05	12.6607	7.36948
42	Steroidal saponins	196363	219772	146853	298809	169824	164102	118844	127121	28763.9	28397	28823	15838.5	9949.62	12782.7	15294.2	17877.9	9.77942e-05	9.14041	4.18406
43	Steroidal saponins	1.10595e+06	1.21193e+06	927971	1.64767e+06	986966	960487	680839	814498	54989.8	85490.6	28390.9	22905.6	55304.4	25354.6	67811.3	83213.4	2.75911e-05	19.6862	10.5367
44	Steroidal saponins	20039	19169	11869.5	22600.8	14842.3	12654.4	9312.25	4063.59	543.469	1635.74	321.867	1731.51	1476.89	305.196	664.845	574.482	0.00043526	15.7914	1.19559
45	Steroidal saponins	47521.6	27398.5	51649.9	81052.3	65586.5	67411.3	44082.4	72822	86540.1	34689.4	10323	60669.9	43853.6	24875.5	32469.5	45165.7	0.173064	1.35128	0.76259
46	Steroidal saponins	22243.4	18834.7	17426.1	20184.3	19275.4	15749.9	12117.6	14538	3788.28	6350.43	3096.48	2739.03	3167.83	2842.5	2193.42	4425.57	1.19433e-06	4.90742	1.26433
47	Steroidal saponins	126533	103443	94288.3	116791	97120.5	81595.4	87336.8	81439.1	57747.1	41060.5	12989.4	32486.5	35411.6	11295.1	28540.2	35092	6.87138e-07	3.09693	2.70886
48	Steroidal saponins	28270.1	29485	24752.3	46703.5	26348.5	35297.7	22331.4	29015.5	13418.3	11763.2	2047.94	4810.92	12396	3033.11	7872.2	18411	3.1115e-05	3.284	1.46559
49	Steroidal saponins	842524	626780	617826	684687	616281	564818	559483	571249	63350.2	130859	55860.6	30743.6	78534.2	33763.5	68885.6	91070.5	8.86056e-08	9.19175	8.12242
50	Steroidal saponins	32953.6	32067	31437.9	30965.9	31637.3	23072.3	20817.7	17658.1	17532.8	15412.2	12397.5	7943.65	9562.7	6625.82	7350.93	10222.4	2.73654e-05	2.53435	1.33822
51	Steroidal saponins	146316	181805	158711	245830	229922	216384	143464	156786	144799	100554	27145.5	88254.9	71446.2	30964.2	74627	80607.2	7.81563e-05	2.39202	3.241
52	Steroidal saponins	14983.2	11469.2	26837.9	27100.2	15268.1	18021.9	16825.8	13943.9	21676.6	23300.4	17183	13917.9	11039.1	15390	5872.21	11242.8	0.302473	1.20755	0.529941
53	Steroidal saponins	11466	33135.1	39540.1	26579.9	46426.5	55157.3	14413.4	11005.7	9634.74	5956.38	6381.27	3322.67	2322.7	2168.27	2319.18	2350.4	0.00342751	6.89943	1.50484
54	Flavonoids	342.03	251.518	285.012	430.167	226.797	371.024	282.35	210.833	598.644	357.221	718.894	471.857	425.625	415.134	371.03	611.036	0.00361153	0.604551	0.129881
55	Flavonoids	898.243	940.941	805.471	755.085	746.025	973.346	777.629	665.898	1268.58	952.076	1216.92	1189.91	1131.28	1205.58	1492.14	1499.89	0.000124271	0.65914	0.216358
56	Flavonoids	1018.78	1228.53	1102.96	1037.45	808.382	931.29	962.156	753.451	1360.63	1156.02	1878.93	1606.11	1648.68	1444.13	1500.35	1549.98	6.8115e-05	0.64579	0.228218
57	Flavonoids	3026.18	2420.35	3177.09	2828.58	2766.66	2785.16	2922.27	2228.84	3561.11	848.802	3203.89	3105.83	3070.75	3030.23	3148.99	2982.51	0.759168	0.965277	0.136039
58	Flavonoids	1026.79	998.07	1280.65	1117.06	856.95	998.967	1100.79	996.15	1353.89	1823.86	1376.83	1731.26	2016.75	1849.02	1995.12	3636.33	0.00796284	0.530659	0.287175
59	Flavonoids	521.816	234.292	238.228	275.528	363.673	156.843	91.2431	180.097	579.819	292.982	596.782	661.507	332.063	459.035	325.558	540.043	0.00748961	0.544307	0.0581876
60	Flavonoids	353.414	410.233	285.12	439.85	384.652	496.95	382.154	286.574	650.761	394.643	613.44	568.285	606.1	328.319	462.387	694.003	0.011353	0.703796	0.106652
61	Flavonoids	399.513	594.113	327.002	351.148	460.448	689.065	374.694	324.429	672.373	557.41	838.952	529.175	655.525	551.311	696.726	570.577	0.00645722	0.694081	0.0408843
62	Flavonoids	186.933	269.146	258.149	265.805	92.4763	207.659	247.046	153.584	529.087	510.762	827.134	548.273	483.188	497.127	280.587	534.011	0.000302783	0.399224	0.126185
63	Flavonoids	1252.55	1780.76	1345.79	1476.04	1322.33	1487.08	1175.58	924.766	1851.49	1166.21	1997.94	1880.72	1374.06	1273.38	2040.48	1960.63	0.0435711	0.794755
64	Flavonoids	1034.66	1172.56	1114.93	994.254	1137.21	1503.53	817.569	849.144	1198.44	1020.06	1183.45	1007.1	1215.86	1070.62	1114.96	1160.39	0.606624	0.961315	0.0280534
65	Flavonoids	398.661	382.302	310.089	369.347	305.627	486.042	300.396	223.888	1288.71	997.631	1486.19	1480.53	919.828	1278.37	918.721	1430.34	7.66023e-06	0.283291	0.313013
66	Flavonoids	873.399	961.591	889.141	839.425	929.987	947.826	881.95	749.882	1215	951.591	1399.84	1156.7	1004.53	1345.65	1615.62	1139.16	0.00249688	0.719692	0.182369
67	Flavonoids	933.539	1028.23	805.732	1207.37	976.306	828.909	818.833	897.859	5037.14	2508.59	2935.39	2486.01	3137.34	2870.6	2114.62	2288.82	0.000446342	0.320669	0.382368
68	Flavonoids	296.976	329.041	262.716	435.626	366.417	293.317	215.682	304.535	1383.11	715.167	1166.46	774.82	800.951	832.392	623.668	999.552	0.000206391	0.343239	0.252538
69	Flavonoids	99.5676	223.413	322.017	179.324	123.894	72.5476	74.7444	116.762	277.923	72.0649	226.198	137.546	236.084	426.252	216.965	497.467	0.0847859	0.579895	0.0898176
70	Flavonoids	1392.74	1693.11	1646.2	1297.49	1234.03	1507.95	1644.91	1288.18	4064.28	1754.22	3893.31	2862.93	3061.68	3774.99	2166.89	3127.99	0.000699445	0.47375	0.414868
71	Flavonoids	695.161	703.082	755.034	990.694	783.332	740.622	668.525	482.886	1119.32	832.562	1072.8	1033.3	835.334	839.337	1049.4	1018.97	0.00203037	0.745971
72	Flavonoids	9554.43	13919.3	11303.6	13860.3	10398.9	9047.06	10188.9	11242.2	74984.7	14878.1	19591.3	9975.76	13928.5	13826.7	13002	20440.9	0.177644	0.495575
73	Flavonoids	597.337	567.235	440.642	755.679	575.098	324.204	649.196	579.732	694.992	547.986	639.53	828.562	605.088	896.144	876.224	838.716	0.0168389	0.757371	0.118109
74	Flavonoids	180.282	620.973	233.2	451.908	235.669	454.464	189.381	180.38	343.387	433.904	498.632	442.67	517.386	565.214	532.858	534.079	0.0294678	0.658266	0.102016
75	Flavonoids	301.455	285.637	420.354	373.781	279.857	236.143	501.728	231.294	507.761	609.183	704.089	662.054	470.735	646.763	651.901	739.482	1.9769e-05	0.526897	0.172984
76	Flavonoids	1223.4	1299.38	1272.61	1258.44	1438.02	1071.69	881.522	1087.15	2230.08	1567.63	1820.65	1563.12	1788.46	1618.49	2043.59	1467.75	0.000246577	0.676053	0.243495
77	Flavonoids	1084.34	2987.51	1036.45	623.119	728.028	757.239	984.366	771.763	23370	6497.99	7114.01	3287.42	6166.6	5394.17	1793.9	7058.12	0.0285793	0.147866	0.69973
78	Flavonoids	1727.84	2839.42	1459.53	1381.9	1429.5	1225.2	1658.73	1124.65	19679.8	4943.56	5997.04	2803.24	5532.7	3706.58	2591.82	6207.02	0.0430371	0.249638	0.583496
79	Flavonoids	2466.01	2075.83	1867.77	2185.04	2023.23	2323.53	2011.58	1422.51	6014.25	4378.28	6105.07	5738.71	5392.1	4361.53	3712.8	4957.35	8.08674e-06	0.402741	0.126185
80	Flavonoids	1241.71	1237.54	1011.22	958.324	812.872	993.111	1076.44	822.055	4734.71	2924.21	3428.43	3506.15	3873.32	3668.45	3995.85	4429.8	8.82885e-07	0.266788	0.569866
81	Flavonoids	6291.13	6449.76	6080.83	6512.87	4853.93	5237.4	5723.77	5073.22	2697.41	6274.76	2413.37	5811.72	5182.82	3722.1	3563.07	3960.32	0.0172498	1.37464	0.350466
82	Flavonoids	3858.88	4585.29	3276.92	4844.25	3850.76	2928.32	3374.8	3070.41	7419.55	7521.12	7539.26	6740.32	6381.42	6029	7948.6	7298.27	9.80756e-08	0.52375	0.494902
83	Flavonoids	1357.66	504.084	403.877	315.102	552.472	457.906	404.408	395.129	1140.76	1141.15	721.363	220.97	354.379	635.18	346.813	372.449	0.703341	0.890042	0.0986242
84	Flavonoids	881.497	769.448	723.507	511.221	706.886	511.143	572.585	383.191	4954.02	4552.57	7486.93	4381.54	5466.24	6693.12	810.727	3159.8	0.000848021	0.134902	0.659589
85	Flavonoids	795.722	607.421	643.418	587.679	457.737	509.315	438.19	532.039	4885.75	5021.24	7585.75	3596.58	5817.62	6375.47	1112.1	2730.31	0.000879869	0.123139	0.657694
86	Flavonoids	955.256	1291.68	887.362	1356.6	872.945	1253.23	781.38	643.394	1087.94	1080.3	1361.34	1091.05	1028.05	1022.12	1833.46	1551.45	0.0953523	0.799729	0.118171
87	Flavonoids	1348.45	835.434	1454.34	1275.22	1453.86	925.38	857.678	975.683	2239.19	1759.38	3359	3194.88	3436.16	3876.78	3210.37	3462.59	4.90492e-05	0.371909	0.450672
88	Flavonoids	1223.4	1299.38	1272.61	1258.44	1438.02	1071.69	881.522	1087.15	2230.08	1567.63	1820.65	1563.12	1788.46	1618.49	2043.59	1467.75	0.000246577	0.676053	0.234678
89	Flavonoids	2466.01	2075.83	1867.77	2185.04	2023.23	2323.53	2011.58	1422.51	6014.25	4378.28	6105.07	5738.71	5392.1	4361.53	3712.8	4957.35	8.08674e-06	0.402741	0.601307
90	Flavonoids	228.47	284.215	74.431	158.027	145.286	312.798	256.574	188.234	1569.53	296.476	501.624	208.83	289.293	361.15	281.67	476.589	0.107295	0.413542	0.132336
91	Flavonoids	549.374	165.785	807.312	386.402	720.001	395.228	576.162	461.697	16017.2	13081	16948.5	10098.2	13318.1	14739.7	2850.4	10541.4	0.000148691	0.0416208	1.14787
92	Flavonoids	1419.94	1429.48	2186.81	1337.27	1299.8	1598.9	1537.9	1297.67	11745.3	8781.4	13908.8	8465.12	13269.8	13109.5	3218.69	9623.47	0.000207068	0.147436	0.995187
93	Flavonoids	2603.08	2750.84	2875.12	1825.95	1784.67	1481.87	1882.9	1645.39	33346.2	26294.5	38919.4	26685.1	31789.7	33035.1	9324.12	27063.4	6.31926e-05	0.0744062	1.75397
94	Flavonoids	100.1	57.1432	24.8076	154.881	276.248	72.6552	68.6449	75.4603	525.122	147.661	746.738	41.1799	55.2627	52.0583	340.419	244.654	0.117545	0.385464	0.0964048
95	Flavonoids	1773.19	1461.79	1100.89	2086.2	1424.75	1769.88	1676.64	1186.27	3077.68	3346.94	2567.17	2571.07	2809.46	2043.77	2562.26	4475.95	0.000767813	0.532082	0.373143
96	Flavonoids	335.284	474.826	330.116	337.243	366.459	497.157	415.132	233.181	921.453	1076.29	821.317	977.515	1059.41	912.459	790.103	525.59	2.30037e-05	0.421985	0.238035
97	Flavonoids	286.107	307.326	305.502	468.993	229.439	405.144	419.517	313.383	1282.14	461.98	905.121	704.515	616.066	537.661	839.324	458.479	0.00548978	0.471193	0.183734
98	Flavonoids	967.176	1013.43	724.067	855.583	463.429	387.138	915.683	189.997	1470.14	804.408	961.519	1096.96	1488.36	383.866	721.101	1157.9	0.0829511	0.682378	0.127636
99	Flavonoids	346.999	682.982	511.012	803.823	414.433	680.532	317.707	346.092	1283.31	444.21	1555.94	1215.77	970.793	1229.97	764.014	1135.11	0.00194916	0.47721	0.223395
100	Flavonoids	3932.69	3468.92	4256.89	3133.71	3624.75	3953.52	3164.46	3901.5	10526.1	8480.66	7857.07	9791.73	8682.46	8733.04	8782.66	7767.28	8.71928e-08	0.416822	0.800169
101	Phenolic acids	300954	351467	244173	234045	266611	315709	249115	224361	540555	501820	536130	455778	468335	461504	432300	416123	3.50131e-07	0.573484	3.8306
102	Phenolic acids	126606	142813	126782	123610	124533	124275	136440	112529	216642	160417	178494	197704	205621	265919	242965	281365	0.000380128	0.58177	2.48525
103	Phenolic acids	5636.86	7399.92	5046.22	9663.17	2666.6	15144.8	6076.7	13565.6	37420.7	20531.9	49336.4	39851.1	47201.9	40899.2	3480.39	37214.3	0.00146914	0.236286	1.29135
104	Phenolic acids	17250.2	31802.4	33177.5	16938.6	20262.7	30223.4	16867.9	26070.6	6870.87	6796.02	6408.46	4843.31	6248.73	5582.17	3473.04	3907.97	0.00011567	4.36417	1.1265
105	Phenolic acids	3414.3	3794.36	4687.09	3477.52	2965.12	3947.93	2191.7	3390.42	1931.8	2659.06	1701.6	706.232	1958.18	1136.22	1888.28	1608.1	0.000108411	2.05074	0.338055
106	Phenolic acids	1125.25	342.111	841.688	1593.55	1090.38	1123.78	1426.66	1120.85	7318.74	10869.1	3790.74	4963.85	9436.94	5754.91	5057.25	7985.38	0.000234478	0.157027	0.779849
107	Phenolic acids	2044.35	2317	1525.36	2100.68	1772.68	1752.41	1858.83	1566.02	18379.4	6377.6	3662.94	6436.44	5297.47	2995.2	6891.69	3245.83	0.0296084	0.280321	0.600237
108	Phenolic acids	2016.31	1828.56	1869.02	2116.13	2179.95	2060.97	1722.7	1530.36	2692.94	2315.83	2822.67	2213.69	3044.23	3747.64	2855.53	3257.56	0.000626566	0.66771	0.240335
109	Phenolic acids	2177.78	2335.13	1602.41	7291.95	3255.33	1804.72	1575	1010.77	15044.4	5482.9	6180.13	5659.85	4961.68	4349.06	5839.17	5823.22	0.0148161	0.394693	0.488924
110	Phenolic acids	22092.9	25781.7	32159.7	17361.8	18704.8	27114	19288.4	24130.2	6713.61	7023.33	13222.4	8696.57	6242.42	7815.54	7821.75	6841.54	1.54955e-05	2.89906	1.27628
111	Phenolic acids	132442	136000	120342	137357	119552	122995	109538	116101	34626.5	36426.4	33075.8	32500.3	31862.5	26032.4	29152.3	30507.2	3.27298e-09	3.91185	2.65914
112	Phenolic acids	818.12	973.938	809.041	877.308	853.29	926.184	594.956	849.164	2000.77	1283.67	1619.25	1852.92	1625.65	1805.18	1022.78	1696.47	0.000128419	0.519266	0.285197
113	Phenolic acids	1332.41	1049.97	1128.48	1190.28	1870.37	1591	1503.78	914.492	11108.3	16790.5	12173.6	14031.4	12489.6	11879.6	9824.72	9910.35	2.16867e-06	0.107739	1.1313
114	Phenolic acids	4263.43	5263.49	2229.42	3567.12	5159.57	4647.52	4077.17	10094.6	4.29614e+06	3.05188e+06	3.80228e+06	3.7298e+06	2.8404e+06	3.64934e+06	3.42786e+06	3.74868e+06	1.00438e-07	0.00137679	16.5381
115	Phenolic acids	1556.78	895.884	973.958	1513.94	1377.5	1496.89	1299.21	1027.75	1184.49	1155.55	909.974	993.74	884.628	683.791	450.023	1127.31	0.0190376	1.37248	0.122354
116	Phenolic acids	2615.87	2899.09	2336.75	7534.78	3175.33	1743.26	2094.43	1571.92	11978.9	4001.23	2987.94	3387.79	3315.34	3496.41	2836.29	4261.52	0.250581	0.660999	0.271591
117	Phenolic acids	1513.88	1325.96	1190.28	1067.67	1204.52	1163.16	1322.23	1044.02	2693.88	1041.11	2675.25	1952.01	1900	2016.03	1708.43	2328.99	0.00344741	0.602592	0.274645
118	Phenolic acids	11161.1	9836.49	8392.33	7124.81	8525.36	8298.98	5035.07	11146	1.56329e+06	1.56787e+06	1.59808e+06	1.19957e+06	1.29858e+06	1.54315e+06	1.46928e+06	1.40912e+06	1.6867e-08	0.00596793	10.5382
119	Phenolic acids	61752.4	31960.3	51656.6	55498.2	58244.8	42019.5	49207.6	50606.6	82804.2	78369.6	54372.5	79285.7	42046.3	62050.3	75268.9	75569.3	0.0100069	0.729302	0.983423
120	Phenolic acids	17251.5	17715.6	14995.4	24347.1	18477.4	20984.1	24178	12342.9	76246.6	67570.1	53605.5	65922.5	48771.6	63820.6	43469.2	44723.2	1.40242e-05	0.323815	1.6825
121	Phenolic acids	1083.66	817.8	944.938	1402.22	1283.25	1443.09	1916.9	1045.12	3139.25	3385.09	2504.51	2798.98	2288.63	2818.82	1777.44	1978.05	9.22534e-05	0.480261	0.384687
122	Phenolic acids	1046.16	1273.03	896.356	1773.7	1423.76	845.132	941.924	1010.28	5606.07	4851	6289.05	4390.13	4412.2	3723.55	8611.68	6839.48	8.02307e-05	0.205941	0.568129
123	Phenolic acids	1828.22	1369.16	1534.91	1844.92	2100.99	1456.56	2168.14	1177.4	9012.04	9421.94	8256.96	8422.37	7829.36	7522.59	8602.97	8557.18	1.17462e-11	0.199338	0.718997
124	Phenolic acids	908.415	772.664	874.047	934.122	883.175	766.54	775.224	642.898	2373.14	1952.95	1364.18	1560.67	1777.23	2041.68	1819.73	1775.99	1.38372e-05	0.447107	0.269194
125	Phenolic acids	1413.59	1260.01	1386.88	1243.76	1305.63	1049.16	1163.4	1036.82	1546.12	1106.68	1572.08	1216.81	1473.61	1315.25	1405.52	1374.86	0.0774749	0.895405	0.0875245
126	Phenolic acids	10127.9	6828.64	4699.41	9944.64	10003.7	9158.6	9128.63	10052.9	7936.16	10916.4	10163.5	15413.8	7731.36	10620.1	20868.7	11248	0.0945524	0.737049	0.460393
127	Phenolic acids	339192	297014	217715	296478	284977	259257	240598	240293	431175	376312	380658	458714	421871	388054	727932	482005	0.00211496	0.593316	3.47249
128	Phenolic acids	3260.15	2604.1	3248.6	4053.21	2732.47	2433.46	2198.54	2448.06	27948.7	23891.9	31269.3	35356	30460.2	24127.9	33009.2	22110.2	1.0226e-06	0.100707	1.38402
129	Phenolic acids	4539.87	4099.35	5026.13	2737.37	4383.67	2542.5	3468.53	2962.2	5002.51	4789.18	4744.47	3774.76	4253.16	4938.1	3530.56	3358.26	0.173906	0.865332	0.149716
130	Phenolic acids	63732.1	57957	32777.3	61992.3	48334.1	39295.8	23068.7	40709.7	28732.7	20724.9	28166.5	27405.9	29537.8	18166.9	28955.4	22675.5	0.00500403	1.80004	1.33886
131	Phenolic acids	64527.6	50382.5	35053.3	73492.2	54134.3	35341.6	34972.4	49524.3	127903	112973	141580	112506	115669	105883	121028	111763	6.94058e-08	0.418652	2.78487
132	Phenolic acids	55491.6	48272.4	45452.7	62685	60020.1	36590.5	31063.6	46989.7	297771	345733	275093	265053	293672	249788	291363	258422	8.75089e-09	0.169778	5.26211
133	Phenolic acids	13025.5	12557.6	12677.4	14240.6	13084.9	6220.93	4039.59	9292.86	486658	215705	129046	191309	243852	207041	112805	137407	0.00181104	0.0493899	3.61062
134	Oxylipins	53043.2	36686.2	50568.7	49612.6	45196.5	46183.1	43345.2	45257	26913.2	58859.9	25245.7	35370.1	29231.2	29280.4	105165	31455.9	0.728862	1.08307	0.373494
135	Oxylipins	553015	490587	426740	423840	595141	455526	370380	458809	620987	461103	494648	651002	635963	853208	454996	583176	0.0409946	0.793685	2.25402
136	Oxylipins	198169	190164	202485	471740	540401	185931	188817	165080	29782.5	28035.7	24508.9	23636.8	91491.2	27245	29983.5	29387.6	0.00292848	7.54313	3.71119
137	Oxylipins	159947	209179	169108	149429	154501	161000	135869	149761	18870.7	16603.7	17165.1	17610.5	18981.8	16583.6	22662.1	20607.1	2.82111e-07	8.64472	3.28834
138	Oxylipins	31391.8	32881.3	30875.1	25766.6	4168.91	34585.4	23454.9	23590.3	7394.25	10467.2	6708.74	7384.6	8057.8	12474.5	8616.49	10221.2	0.00153825	2.89821	1.02239
139	Oxylipins	21560.1	21446.7	24446.7	18854	22238.9	22779.7	18040	16668.9	4511.83	5565.46	4214.33	5909.02	4531.98	4499.08	6388.77	5645.66	1.56346e-07	4.02352	1.08701
140	Oxylipins	32185	18775.5	36747.3	16102.8	19532.6	20024.8	15783.2	25701.8	14871.9	14509.3	16310.2	18004.6	13782.2	16078	14228.3	16941.5	0.0287239	1.48207	0.5898
141	Oxylipins	19557.6	14461	8461.41	16304.8	23061.5	18859.1	22817.3	16676.5	2465.42	2226.63	1974.31	3124.55	2574.83	4847.99	3194.55	4096.16	4.08707e-05	5.72139	1.24899
142	Oxylipins	3.09603e+06	4.69044e+06	3.14419e+06	2.827e+06	2.94198e+06	2.97618e+06	2.58632e+06	2.46888e+06	546627	463975	449473	646889	705979	1.48084e+06	628406	1.78322e+06	5.01407e-06	3.68822	12.5899
143	Oxylipins	53043.2	36686.2	50568.7	49612.6	45196.5	46183.1	43345.2	45257	26913.2	58859.9	25245.7	35370.1	29231.2	29280.4	105165	31455.9	0.728862	1.08307	0.373494
144	Oxylipins	48687.1	53965.3	53313.6	47255.2	49494.4	44930.5	48662.4	37312	10106.8	13576.9	7223.43	7877.73	5428.09	7233.81	10109.5	9624.97	3.16302e-09	5.38935	1.72418
145	Oxylipins	724442	715146	815969	671756	957798	696604	886612	615404	152251	194248	154781	172275	154912	242653	228669	248379	5.12623e-07	3.92963	6.49608
146	Oxylipins	14438.3	17387.9	13766.6	15198.3	17265.9	16048.9	12563.8	14700.1	8976.06	9065.25	7384.17	5604.9	6700.35	7990.23	9606.22	9049.12	3.1349e-07	1.88532	0.716958
147	Oxylipins	60133.6	56512.2	65987.3	57642.7	60728.5	57574	49185.1	48686.4	9728.87	7871.78	7584.38	11379.9	7797.9	8387.56	7059.03	8554.36	1.8798e-08	6.67677	1.92613
148	Oxylipins	15947.6	20349.3	16861	13791.7	22876.3	17266.7	14624.4	15778.2	5657.38	4035.71	4345.69	6532.16	8076.44	10227.3	4795.59	6654.15	1.82084e-06	2.73218	1.09106
149	Oxylipins	14146.7	12456.7	11919.6	13565.6	10645.4	12475	11406.2	10119.6	9762.03	6042.02	7498.05	6626.13	6218.87	5955	8169.03	7082.35	3.53647e-06	1.68664	0.593928
150	Oxylipins	38495.7	41047.7	39955	35181.5	41220.4	32213.9	35156.7	32666.4	5763.02	4116.34	5683.33	6015.56	5907.51	7477.2	9861.29	9836.93	4.1315e-10	5.41403	1.885
151	Oxylipins	5514.58	5921.73	6365.67	16461.2	6548.59	5610.3	10183.4	8965.83	3094.27	2675.21	2860.45	2139.99	2359.83	3141.66	3168.28	2935.15	0.00459915	2.93058	0.554124
152	Oxylipins	8224.67	8696.32	8063.1	8905.54	6627.84	8069.18	5864.58	6534.7	7261.36	4989.39	6759.48	7959.94	6551.07	8274.76	8762.6	6975.54	0.465869	1.06	0.148882
153	Oxylipins	9135.74	4342.63	7501.19	4726.1	5738.27	6461.89	5426.07	4194.54	3918.11	3635.78	4776.81	2330.33	4938.67	7159.97	4652.51	8423.27	0.312165	1.19307	0.154754
154	Oxylipins	14813.7	17943	13445.5	12829.8	16457	12552.6	13929.2	9596.84	2963.17	2899.54	1697.58	2313.32	2129.16	2255.76	1764.11	1916	2.35048e-06	6.21941	0.933716
155	Oxylipins	4980.44	6569.22	22205.8	5687.39	6275.17	6275.99	5750.99	5684.87	8118.14	4886.42	5922.8	7116.65	4122.01	5449.93	5982.2	6146.3	0.377655	1.32853	0.203918
156	Oxylipins	57258.8	43935.7	60419.1	33330.6	49026	48450.8	54635.5	38321.3	7280.45	7439.53	7476.62	7544.41	6514.83	6857.69	7466.04	8490.12	4.98359e-06	6.52412	1.7381
157	Oxylipins	796076	432149	468122	702087	744848	651770	368117	543523	174734	136332	134516	203106	156177	217844	195773	229079	0.000117354	3.25146	5.29907
158	Oxylipins	8349.51	9514.6	8715.94	8411.9	9104.5	7721.54	6418.03	7884.39	5117.34	3675.14	4989.62	5698.64	4347.67	4140	4554.55	4899.51	1.15518e-06	1.76686	0.507437
159	Oxylipins	32502.4	41140.9	33976.4	30347.3	27963.9	24862.4	25868	21413.3	4803.23	5043.32	5767.4	4341.17	4368.42	3465.79	3440.93	4421.07	6.69436e-06	6.67786	1.36984
160	Oxylipins	1.37586e+06	1.12335e+06	802676	1.21915e+06	1.48844e+06	1.22812e+06	707315	1.046e+06	813523	661605	648516	1.60746e+06	771508	1.20261e+06	763542	986875	0.221222	1.20592	2.26026
161	Oxylipins	96243.4	117686	96207.4	102500	107769	100427	63518	86098.2	81537.9	61025.2	45992.7	79414.1	94856.1	106204	81805.8	90290.7	0.0888322	1.20171	0.995007
162	Oxylipins	219177	194730	225390	176767	245029	209051	167846	184304	120496	118728	82173	124345	134257	155274	124251	160366	3.74559e-05	1.59065	2.78663
163	Oxylipins	94444	111876	112530	62850.7	104415	70725.3	94284.6	48971.8	14988.9	15694.5	15317.4	15823.5	7658.55	25060.6	12156.1	13006.5	4.06108e-05	5.84847	2.27705
164	Oxylipins	14619.6	14719	18900.7	12935.5	13822.6	13896.2	12960.3	11648.5	5335.62	4441.65	4405.78	3937.53	3547.4	3470.84	3777.97	7842.09	1.82092e-07	3.08775	0.839772
165	Oxylipins	67285.5	75002.2	61349.6	58920	58604	69911.6	51366.8	51156.5	29782.2	26080.5	27190.2	30656.6	27425.6	26730	24808.1	27157.6	5.41663e-06	2.24534	1.58608
166	Oxylipins	9443.42	10203.8	7583.37	7729.03	7218.39	9232.41	5964.17	6500.19	8146.41	7702.74	7496.93	7015.25	7372.02	6311.2	9660.79	7928.86	0.665414	1.03635	0.135698
167	Oxylipins	8363.51	7774.27	7439.56	5971.56	6368.41	5529.73	5220.74	4703.25	17941.6	11558.9	9676.94	17127.2	11196.9	11918.2	11971.8	12619.9	0.000196898	0.493899	0.659481
168	Oxylipins	17609.2	13607	13846.3	14458.3	13474.6	16101	16392.2	14304.1	26772.2	26465.5	29628.3	26807.9	26121	29720.2	30447.1	25034.6	2.48497e-09	0.542056	0.971687
169	Oxylipins	190726	179649	271063	188739	214049	148350	170115	141851	9994.91	6481.19	7242.38	9190.8	13859.3	7825.85	8786.42	8305.21	4.89616e-06	20.9879	3.65535
170	Oxylipins	340168	356911	378141	304920	301766	276656	223815	244296	112166	90524.5	96644.3	104150	87859	90059.2	115222	111864	9.26489e-06	3.00149	3.86411
171	Oxylipins	152435	132531	110129	111659	79289.5	110877	59495.9	90541.7	37676.7	30628.9	32178.4	30899.5	36485.7	33730.6	43811.2	32172.9	0.000212484	3.05118	2.21517
172	Oxylipins	11042.9	13769.8	9403.68	8370.27	7673.17	8742.1	9912.59	6434	12643.1	11831.4	11009.1	11202	12992	12978.4	14759.7	12066	0.00672961	0.757412	0.390093
173	Oxylipins	502841	540654	469300	409345	418412	385695	370948	333955	141941	134248	1.19953e+06	129926	133969	147963	147186	1.38993e+06	0.996751	1.00189	0.815782
174	Oxylipins	7898.76	7752.98	10070.6	8088.53	3385.2	6368.99	4986	4162.63	15497.4	8072.9	6841.02	4070.89	6701.32	7503.29	6729.16	1704.08	0.739764	0.922859	0.108295
175	Oxylipins	237121	192407	224520	236739	217686	173272	132484	175402	153686	143825	110630	153985	146166	141103	154549	167319	0.00467824	1.35719	1.74691
176	Oxylipins	1631.79	10717.8	1805.06	1341.85	1776.3	5731.14	1365.12	727.361	9956.06	6536.21	5555.5	6720	7735.17	7162.46	7437.11	6806.16	0.0114943	0.433379	0.458761
177	Oxylipins	1929.12	1912.95	577.625	374.225	1275.68	447.338	436.461	294.289	5054.08	2596.77	2202.3	2159.7	2020.37	2032.18	2528.02	2227.78	0.00196556	0.348091	0.320353
178	Oxylipins	152931	144916	149293	139821	147250	129819	127954	113665	87806.3	62828	50751.7	83400.2	85561.6	77918.3	73377.2	93804	4.08787e-07	1.7965	2.61954
179	Oxylipins	19027.8	15655.4	14523.1	21228.1	16972.6	9379.74	9360.4	12960	14430.8	18371.1	8236.76	7386.47	5462.94	4404.28	3502.43	4611.29	0.016942	1.79362	0.55344
180	Oxylipins	2363.97	1980.37	1283.71	1844.83	1465.53	765.292	1123.89	937.063	410.283	1143.48	788.86	749.044	493.314	626.458	440.254	456.344	0.00319507	2.30316	0.22355
181	Oxylipins	2265.28	3244.8	2152.32	3521.02	2172.39	1035.25	531.813	1559.58	0	851.92	160.692	371.474	250.27	344.43	193.666	254.465	0.00153447	6.79152	0.331762
182	Glycerophospholipids	86073.7	85841.5	80133.5	64388.1	79695.2	73812	75776	56007.8	10799.3	12098	12728.2	5490.32	10401.5	13770.4	11844.7	12996.1	1.93892e-07	6.67632	2.73316
183	Glycerophospholipids	78385.4	76014.2	61951.4	69976.8	63574.4	40697	41658.8	34895.3	23227.8	30027	20305.1	16069.8	13385.4	11348.5	8443.59	13863.2	0.000114662	3.4181	2.12136
184	Glycerophospholipids	108250	104075	105060	82791.9	98012.3	76483.2	111708	68460	5487.6	9601.85	10360.5	12401.8	12423.6	12250.2	6952.91	7280.31	1.01819e-06	9.83393	2.52724
185	Glycerophospholipids	157083	149956	138946	139669	145853	125471	127671	75184.9	24031	19536	20825.4	30197.4	24941.8	21723.4	17556.7	15680.1	3.634e-06	6.07382	2.87278
186	LysoGPLs	17811.1	14788.7	10266.8	10049.4	14906.9	20967.7	12183.8	13023.4	25739.4	12026.2	23113.2	18335.9	16241.1	21257.9	30701.2	28116.6	0.0120287	0.649443	0.724577
187	LysoGPLs	225810	235249	182899	197204	204109	169045	178359	157071	17949.3	12562.7	19679	23027.4	16322.6	17910.7	25491.7	26915.2	2.27532e-07	9.69447	3.63459
188	LysoGPLs	16389.7	17859.7	12843.5	15603.4	15143.1	10441.2	11930	12678.3	19696.8	14871	11934.1	14984	17634	11797.3	21021	23280.7	0.135326	0.834862	0.431528
189	LysoGPLs	18110.7	18559.8	16805	15675.1	20125.5	15666.2	23303.1	9553.64	4692.65	3670.17	3193.94	3766.54	2202.68	4909.81	4196.22	3253.21	1.87796e-05	4.61094	0.984529
190	LysoGPLs	9942.98	10690.3	8352.72	9821.26	10253.2	10822.2	7551.63	6393.43	5891.99	8240.36	6797.39	9064.35	5900.56	8685.49	5270.39	6143.68	0.0117025	1.31849	0.354105
191	LysoGPLs	157909	59898.5	60400.4	54152.3	17534	53601.5	43018.3	45273.8	287080	680418	645771	156067	401661	248105	172526	190710	0.00594457	0.176753	4.33226
192	LysoGPLs	31373.7	27285	50899.5	16558	31905.9	30424.9	16081.4	13461	21153	28834.3	299598	40632.4	75138.2	19150.8	17147.5	22160.5	0.301922	0.416158	1.15142
193	LysoGPLs	2288.89	1635.84	834.549	1319.32	602.9	515.698	1040.26	611.642	52033.2	55140.2	35147.5	32657.7	18246.7	17488.5	21975.7	24148.9	0.000553295	0.034454	1.44196
194	LysoGPLs	5445	2127.2	3212.66	1277.88	4260.7	2833.25	1320.15	1040.11	11453	41310.8	74044.3	25574.5	15444.7	11617.6	8770.19	9478.99	0.0291105	0.10884	1.14567
195	LysoGPLs	4045.07	4159.31	3343.49	4258.15	4030.49	2733.99	6007.03	2249.14	885.168	1299.53	1177.09	645.116	889.432	1082.86	1027.51	1385.42	0.000167441	3.67329	0.544932
196	LysoGPLs	29881.9	32392.5	35236.5	19887	36848.8	39732	36800	44875.2	20358.3	24444.5	24523.6	22440.2	16488.6	27390.1	32281	21742.3	0.0048439	1.45334	0.933943
197	LysoGPLs	12213.1	8940.41	12746.5	15660.4	11484.3	11819.5	10353.2	8105.6	174497	320684	137926	111799	104260	124725	80630.6	77937	0.00228433	0.0806413	3.81773
198	LysoGPLs	13299	8215.8	5159.52	16849.8	11907.4	5264.9	5566.11	6657.29	9241.67	11932.6	3931.95	4163.98	4113.07	2043.23	3221.04	3157.47	0.0702738	1.74428	0.569392
199	LysoGPLs	6839.26	7543.24	7187.01	9066.09	6731.97	6455.76	7313.46	5957.47	6019.67	9369.74	3589.95	3754.48	2533.2	2004.15	2902	4155.22	0.0117231	1.66318	0.509837
200	LysoGPLs	10684.1	16053.6	15796.9	13649.2	13617.6	11389.1	11653	9670.36	14110.4	25058	5311.61	4529.62	4730.21	4374.83	4086.8	5586.88	0.153924	1.51226	0.643419
201	LysoGPLs	2.24208e+06	4.63794e+06	2.54356e+06	4.17145e+06	2.89551e+06	1.16115e+06	2.65321e+06	1.24626e+06	397740	1.24064e+06	201074	167786	120670	171921	111971	261779	0.000762107	8.06079	15.5802
202	LysoGPLs	13562.2	28480.3	16827.8	27330.6	17475.6	9227.06	12385.9	8726.17	4514.62	66758.8	2878.64	4015.99	2417.48	2597.63	2363.68	3224.36	0.518219	1.50967	0.953173
203	LysoGPLs	1923.46	2887.67	1497.64	3551.37	2571.49	1058	1654.9	880.622	2063.23	25464.9	1399.13	721.533	794.7	983.885	800.047	1367.4	0.49563	0.477013	0.563536
204	LysoGPLs	7547.23	8676.33	8802.26	9804.79	8755.39	5666.32	10047.7	5771.5	3491.86	2122.42	1905.07	1773.12	2060.74	1622.58	2348.91	1677.18	6.17717e-06	3.82732	0.658677
205	LysoGPLs	4866.08	3802.83	5275.29	5277.8	6187.08	5003.62	4214.48	4141.1	9029.89	65478.9	8456.88	2556.56	1947.53	3175.36	2811.01	2351.06	0.385945	0.404649	0.630006
206	LysoGPLs	6032.38	7895.49	6223.91	8274.84	6479.3	4789.6	5541.68	4117.36	3857	5323.12	2713.02	2496.28	1962.58	1798.04	1532.61	2341.5	0.000168677	2.24093	0.463958
207	LysoGPLs	3571.7	5489.24	4103.89	5755.76	4741.12	2662.49	5795.13	3662.46	15367.5	35004.4	10137.4	9765.18	6495.98	9391.02	5645.33	10815.4	0.0407884	0.348675	0.658132
208	LysoGPLs	2796.03	7886.24	7221.09	6987.18	5469.26	3188.07	2777.5	5250.3	7518.19	13550.2	5741.02	4156.48	3148.21	2039.28	3094.75	3612.54	0.91721	0.970019	0.122052
209	LysoGPLs	9654.76	10384.6	6736.62	7630.51	8610.46	5122.52	5973.99	7862.99	7349.45	14581	4626.37	3332.94	2837.81	5086.51	2383.7	4169.25	0.183712	1.3969	0.300578
210	LysoGPLs	44200.9	115462	55356	86139.1	61421	30944.6	130946	61411.3	107724	380237	72405.3	65788.7	41020	65411.9	40766.5	106798	0.400292	0.665659	1.28331
211	LysoGPLs	64562.1	129007	76992.9	106699	76219.8	44359.2	73827.6	42193.8	30289.1	94442.3	17258.3	16296.6	13223.9	17907	11609.8	20910.8	0.00398148	2.76592	1.64967
212	LysoGPLs	7481.58	15411.7	7099.9	10635.2	8811.83	5867.71	8012.12	9041.6	17934.3	69641.2	10737.3	8400.87	7654.53	9485.88	10135.1	9842.08	0.27311	0.503101	0.631248
213	LysoGPLs	28440	34977.3	30252.2	30869.3	26030.2	42792.1	32547.8	16447.3	38658.1	19386	31795.9	22786	26504.5	51771.7	21816.4	23898	0.880731	1.02426	0.0418205
214	LysoGPLs	4494.04	6482.65	6017.31	6501.05	6352.85	4310.45	5729.36	3945.08	15345	21606	10109.5	11788.3	5868.96	5446.7	5163.87	7000.6	0.0522469	0.532411	0.475338
215	LysoGPLs	10717.3	18406.4	13011.6	16195.2	15707.2	9743.9	8516.86	9830.49	27369	62829.9	15851.6	8906.84	8176.01	8522.72	6398.17	9538.64	0.435708	0.691964	0.933582
216	LysoGPLs	7192.41	10684.8	9864.29	10568.4	10947.2	6401.24	5100.33	9493.08	20352.1	12779.6	8758.74	10383.1	6636.36	11312.7	4806.95	6960.97	0.456032	0.856827	0.367997
217	LysoGPLs	10798.5	10355.1	10417.7	11241.7	10044.9	7545.34	8891.32	7134.91	39352	54022.9	26665.6	12671.1	11754.1	12410.7	11203.2	11688.5	0.0598293	0.425156	1.16272
218	LysoGPLs	42635.3	82361.8	47799.1	72552.2	55591.3	26701.5	83205.8	43004.2	126991	261775	75933.3	80879.4	45243.3	55414.7	42728.7	62844.7	0.201339	0.603678	1.24831
219	LysoGPLs	81152	167688	120055	140909	117290	43292	101771	46326.9	38834.1	274816	25330	18563.5	15263	16689.7	15575.1	22696	0.196194	1.91339	1.4901
220	LysoGPLs	24405.9	19946.2	19717.5	25983.1	19269.6	20085.7	25481	14643.8	9413.87	6641.76	11140.6	8796.96	8012.14	8085.96	9647.22	8977.25	1.58773e-05	2.39739	0.93789
221	LysoGPLs	146921	66317.6	157117	63711	132178	72065.7	72167.1	88998.8	254138	250464	195284	206991	188904	121074	111232	116880	0.00667945	0.553283	2.10338
222	LysoGPLs	112064	123069	116274	135314	108062	107028	128469	71740.5	139878	106175	274726	319949	198271	254711	242743	225991	0.00306652	0.511801	2.45916
223	LysoGPLs	66505.4	65495	106087	73973.6	77759.8	53181.1	85156.5	41750.5	89075.5	30760.1	38360.3	46247.9	56555.3	37633.2	36314	69425.1	0.0558347	1.40937	0.996061
224	LysoGPLs	300641	436935	729496	477903	566519	481121	172131	285869	374585	48364.6	277410	78190.6	78821.3	31502.3	20740	35145.7	0.00146076	3.65237	4.19557
225	LysoGPLs	712.271	596.561	424.385	637.321	478.509	467.904	409.58	358.273	2120.76	1705.65	1343.65	1339.98	1216.18	1034.15	1317.55	1380.57	4.91042e-05	0.356487	0.254583
226	LysoGPLs	8655.53	6743.02	7834.14	9492.69	9497.77	5926.6	13219.7	4787.45	7412.65	4700.3	5359.92	5582.3	6219.13	5021.18	5862.29	4401.89	0.0230432	1.48468	0.351732
227	LysoGPLs	386944	342706	395690	293829	966449	496513	433439	266960	483918	558045	1.12913e+06	459227	875200	312355	297372	652865	0.266374	0.751353	2.18907
228	LysoGPLs	47269.4	40121.3	29785.7	40525.7	57321.2	32170.9	19730.7	20733.1	84786.4	180512	325715	171609	78821.3	78987.8	55901.8	63361.9	0.0237299	0.276675	2.36196
229	LysoGPLs	8338.82	8886.15	9634.79	9201.11	7880.62	4733.76	5715.78	5529.15	10953.6	9979.08	10870.1	7502.88	4653.05	4935.42	7522.65	7598.02	0.647622	0.936037	0.0859294
230	LysoGPLs	3287.84	4174.81	3371	4714.68	4668.31	1862.54	3687.28	2138.71	127640	56434.6	133356	115023	85099.2	90477.1	84201	124430	1.72458e-05	0.0341698	2.70459
231	LysoGPLs	13619.4	5950.12	6662.07	7247.71	7866.07	7145.03	5517.79	5248.05	36895.5	37348.3	25434	35002	29313.7	27034.2	26427.4	25762.2	3.60492e-07	0.243635	1.29809
232	LysoGPLs	1787.2	2394.78	2689.65	1876.77	1935.14	1596.25	1259.39	1611.76	21539	22039.6	22444.6	19742.5	13559.8	10060.4	10455.3	12884.5	0.000106264	0.114152	1.02468
233	LysoGPLs	3830.92	1994.1	4802.97	3950.77	2228.54	2533.54	2982.33	1268.62	57049	43257.4	34050	29921.1	26190.1	18797.6	20789.4	23278.1	0.000396096	0.0931257	1.39759
234	Sterol Lipids	13496.2	22099.6	16103.4	12975	17202.8	13246.7	10736.4	9516.37	10961.3	12870.3	12971.6	10064.1	10952.9	9095.92	2829.97	4671.07	0.0186537	1.5504	0.726511
235	Sterol Lipids	8701.84	27514.7	14536.6	12561.9	11770	14560.5	5384.07	6750.55	2963.49	4106.23	3336.36	4884.29	1739.47	1448.18	2345.29	2138.47	0.00469101	4.43259	0.944723
236	Glyceroglycolipids	3432.32	3088.36	3062.55	2603.01	2041.93	2290.92	2777.6	1718.57	9933.88	7617.86	9472.51	9628.82	8398.74	9689.77	9217.2	9958.22	1.61984e-10	0.284309	0.707206
237	Glyceroglycolipids	6175.67	6293.07	6289.56	6362.03	6695.67	4896.49	4564.43	3915.93	7883.19	15404	4317.03	3844.24	1852.1	1245.99	1919.69	2286.11	0.653552	1.1662	0.440201
238	Glycerolipids	37282.5	39876.3	20876.8	46875	32477.4	20520.6	16455.6	22392.4	96516.3	110901	70893.2	65634.6	59316.9	61751.1	51732.8	56724.5	0.000426964	0.412849	2.15782
239	Glycerolipids	38345.8	26655.3	22561.4	33004.5	29188.1	18949.2	27548.8	19911.3	35475.3	64721.4	20618.7	20819.4	14846.2	15061.8	15391.2	12384.7	0.759064	1.08452	0.874794
240	Fatty Acyls	2.85608e+06	2.50235e+06	2.53796e+06	2.30543e+06	2.49363e+06	2.51155e+06	2.43237e+06	2.14336e+06	213008	195735	210334	206406	184340	166932	219413	193225	7.04072e-09	12.4467	13.2102
241	Fatty Acyls	11158.8	9915.47	10540.4	10421.6	11370.5	9939.35	12470.1	10340	11706.7	13219.2	13568.4	12668.2	12390.6	13283.5	15118.1	14754.4	0.000220083	0.807394	0.396641
242	Fatty Acyls	263.289	317.288	208.38	491.359	321.167	398.725	323.068	348.575	1599.68	626.559	941.623	759.186	552.016	770.048	695.018	779.417	0.00292642	0.397387	0.183219
243	Fatty Acyls	7652.91	5475.05	6847.2	5910.15	6590.71	5841.05	5724.39	8256.48	3914.64	5056.23	5911.08	3464.41	3523.85	3499.65	3261.83	4205.56	0.000180797	1.59264	0.386959
244	Fatty Acyls	4163.58	3963.52	3751.54	4247.6	4101.46	3792.8	3899.72	3345.3	4092.47	5799.98	4112.68	3647.18	3770.69	3863.92	3456.5	4157.01	0.476873	0.950307	0.102362
245	Fatty Acyls	1965.55	879.506	1606.68	1380.55	1334.98	2444.32	1357.29	3730.31	1221.46	1094.5	2548.7	1762.71	1085.42	754.922	778.227	1130.47	0.180447	1.4166	0.115884
246	Fatty Acyls	2602.97	2399.89	2228.8	2548.4	2235.39	1884.91	1517.46	1575.79	1401.55	1654.95	569.564	323.456	520.903	356.13	549.59	442.236	3.72466e-05	2.92068	0.302893
247	Fatty Acyls	1762.41	1543.34	1768.92	1689.28	1543.3	1406.95	945.596	1816.77	2006.95	2152.98	1503.9	1152.5	1211.59	600.332	759.907	1018.07	0.267017	1.19895	0.0768904
248	Fatty Acyls	4648.49	3579.16	3930.8	4616.76	4047.99	5434.03	3983.91	8443.4	5548.45	7286.16	70188.3	9068.85	4304.3	3840.6	4287.69	5417.73	0.307877	0.351863	0.534479
249	Fatty Acyls	18775.1	22885.9	14424.4	19816.5	14514.4	8373.47	4378.99	8988.94	51930.1	73013.1	30758.7	33375.1	24037.3	22402.9	13505.3	26409.6	0.0197601	0.407206	1.02354
250	Fatty Acyls	2301.75	2855.6	1847.64	2120.53	1430.35	1319.86	551.164	1515.68	1900.33	2313.27	1296.61	1271.31	1250.9	1182.02	1223.71	958.196	0.301185	1.22342	0.087053
251	Fatty Acyls	2306.94	1803.38	2089.32	2258.2	1670.35	910.686	747.287	1347.13	1746.54	2141.48	1608.47	847.55	773.221	695.19	685.771	756.543	0.121048	1.41908	0.127117
252	Fatty Acyls	3876.6	4424.93	3792.24	4553.14	4164.84	3255.74	1707.26	2392	4313.95	5362.26	2661.22	3228.73	2221.62	2173.4	1234.59	2211.36	0.332758	1.20334	0.129141
253	Fatty Acyls	27237.2	35286.4	21503.9	31157.9	29264	12831.9	8757.79	18250.8	3638.94	6788.57	2584.44	1636.67	1418.27	1163.91	1611.93	1508.91	0.000356957	9.05528	1.17046
254	Fatty Acyls	48028.8	58941.1	50040.5	65079.3	49114.3	29343.4	13544.4	40779.8	93380.5	145029	58285.9	58041.3	38492.3	36022.6	29325.7	41100.2	0.255846	0.710201	0.786309
255	Fatty Acyls	1708.98	1408.63	990.247	1505.68	1496.8	1153.69	1553.7	901.091	4638.19	10559	2075.95	3035.76	1087.63	1324.17	1783.84	980.498	0.149337	0.420592	0.282007
256	Fatty Acyls	9596.24	11443.3	7289.94	10951.4	9434.75	4661.81	5247.25	8649.55	15936.1	103334	10992.5	8991.82	7362.85	6968.58	9204.2	7909.55	0.308758	0.394108	0.803157
257	Fatty Acyls	12210.8	13480	8201.52	15175.9	9425.23	2583.05	2062.02	6283.14	20611.9	64525.3	6461.15	5179.45	3481.74	3200.1	3307.57	3479.36	0.52846	0.629695	0.472225
258	Fatty Acyls	34065.9	33083.9	44954.4	32875.8	34421.7	49572.3	35350.2	53163.8	27036.9	21898.4	29350.7	39398	49414.6	40301.3	46692.6	42523.6	0.575246	1.07037	0.656481
259	Fatty Acyls	180201	303182	322387	281872	307464	196896	333337	320310	212671	203363	204882	242969	184427	197338	253301	259297	0.0249362	1.27721	2.12464
260	Fatty acyls	4297.42	3096.67	3712.65	5790.71	3802.12	4927.81	3597.11	2128.67	4918.26	4055.67	5181.95	5599.16	4874.2	7199.76	7914.4	7800.74	0.00866271	0.659454	0.330901
261	Fatty acyls	11712.5	10558.9	13329.8	9863.9	10918.1	4686.02	5774.47	2954.88	4489.65	3693.48	4181.88	3076.74	2668.52	2711.2	1404.9	4003.77	0.00406414	2.66101	0.562258
262	Fatty acyls	1.37586e+06	1.12335e+06	802676	1.21915e+06	1.48844e+06	1.22812e+06	707315	1.046e+06	813523	661605	648516	1.60746e+06	771508	1.20261e+06	763542	986875	0.221222	1.20592	2.26026
263	Fatty acyls	103247	89068.8	97046.1	88476.7	92611.5	85724.2	70007.3	73749.5	41058.9	36949	37867.7	43041.7	38010.9	28468.1	70218.7	36607.3	1.90664e-06	2.10682	1.82201
264	Fatty acyls	5741.01	4177.51	7749.22	6992.4	5001.39	5822.75	3294.83	4881.86	3641.88	2800.7	2729.02	2212.18	2243.24	2290.28	2643.71	2438.95	0.000636236	2.0791	0.425449
265	Fatty acyls	2449.32	2021.61	3490.07	3665.16	6899.87	2001.57	1735.16	3388.83	1623.03	1249.67	652.902	1180.28	642.116	537.822	731.499	609.206	0.0055718	3.54965	0.354194
266	Fatty acyls	3479.65	3221.92	2921.23	2724.12	2426.3	1790.53	1391.7	1800.34	3021.53	3512.45	1807.35	2285.84	1616.46	2181.05	2487.8	3641.75	0.794301	0.961155	0.0492628
267	Alkaloids	1600.85	3049.14	1650.49	1106.13	1721.35	2021.98	1563.01	1386.76	2993.52	3633.19	6120.21	2320.37	2509.41	3579.35	3929.79	2494.88	0.00586933	0.511216	0.304777
268	Alkaloids	50940.3	53140.1	52665	55836.7	53422.3	44518.3	44707.6	42656.9	3106.72	2202.86	2010.83	1912.02	2655.13	2416.54	4089.45	2409.46	1.69514e-08	19.1264	1.90225
269	Alkaloids	96510.7	83388.9	76096.4	80724.3	80957.9	76367.2	73838.5	67548.4	5319.9	3793.42	7478.9	4241.49	3881.11	2998.2	5453.5	4863.5	2.44298e-08	16.7087	2.38984
270	Alkaloids	286126	270776	228175	265759	256460	238635	222167	221291	26756.7	10709.4	11176.4	8534.8	7252.59	7248.8	27285.4	12550.2	2.09509e-09	17.8398	4.23925
271	Amino acids, peptides and derivatives	16212.2	14228.9	15790.4	13740.8	14729.2	14103.5	10142.1	12341.3	15314.2	15771	9323.61	61925.1	14426.8	15682.5	116949	47312.4	0.122946	0.375081	1.07834
272	Amino acids, peptides and derivatives	5548.41	7375.66	5689.6	1731.92	1233	4075.84	4114.93	414.907	1813.76	1425.12	4050.91	1592.73	3508.92	3597.18	3906.67	2755.38	0.343976	1.3326	0.190252
273	Amino acids, peptides and derivatives	14839.7	15713.1	15119.2	13459.7	13310.5	15612.5	15546.1	12349.6	147135	121524	127555	132091	146092	134179	141105	144183	1.67855e-09	0.106001	3.06183
274	Amino acids, peptides and derivatives	369846	362864	386084	332200	365821	313078	330531	291146	458849	602252	659670	561628	587350	310176	329572	390922	0.0187176	0.705455	2.91919
275	Amino acids, peptides and derivatives	17484.6	18215	12077.1	14363.3	13185	13299.4	13746	9450.42	27062.4	11154.5	25007.1	23371.2	23105.7	25792.4	37373.4	44032.2	0.00661569	0.515543	0.943205
276	Amino acids, peptides and derivatives	155694	88608	73619.1	119760	109596	139154	120683	100513	1.04097e+06	897513	942126	880808	971102	1.23851e+06	882153	975086	6.11826e-08	0.115942	8.10112
277	Amino acids, peptides and derivatives	2613.8	35055.3	35601.9	27228.1	2551.01	41385.3	39220.1	4691.83	11684	218958	186934	182099	215700	240271	309803	306244	0.000700028	0.112668	4.26945
278	Amino acids, peptides and derivatives	151067	164620	152683	156200	159521	131131	157821	126547	71436	79404.3	97884.1	86253.4	77629.9	68300.5	101267	87982	7.58762e-08	1.79001	2.20356
279	Amino acids, peptides and derivatives	9962.96	16807.9	8136.78	6568.39	2596.98	10933.7	4961.9	8188.13	3762.22	3132.67	24359.2	45453.9	50365.8	6147.63	48368.1	58658.9	0.0355334	0.283693	1.38047
280	Amino acids, peptides and derivatives	6726.26	5789.64	5026.68	5940.6	4928.36	4923.3	5541.22	3531.41	140051	100765	131573	131804	104963	144093	202108	157433	6.6454e-06	0.0381091	3.16637
281	Amino acids, peptides and derivatives	131096	85623.8	96690.2	180296	96082.3	89317.1	150621	92833.8	294193	319402	314644	313722	283482	354310	283896	305197	1.59764e-08	0.373681	4.69028
282	Amino acids, peptides and derivatives	35939.4	24436.8	21961.1	11412.3	13426.2	29395.7	28030.7	25194.7	33080.3	44442	75877.3	66256.4	32489.6	70259.8	158366	110498	0.0125615	0.320999	2.27102
283	Amino acids, peptides and derivatives	32954.8	70101.5	64226.5	34940.1	39922.9	63902.4	112290	49641.8	112846	90698	165499	172529	107246	183932	202718	155233	0.000184909	0.39303	3.05061
284	Amino acids, peptides and derivatives	16756.5	1.68739e+06	7964.06	1.40901e+06	200974	1.40112e+06	198010	484648	1.17487e+06	1.12753e+06	1.24766e+06	1.311e+06	1.5902e+06	1.64397e+06	1.75999e+06	1.71703e+06	0.0175468	0.46714	6.11272
285	Amino acids, peptides and derivatives	88697.9	78646.7	68355	88018.5	42459.4	80057.8	1782.16	81258.1	75673.9	96897.7	96454.1	65388.5	65180.7	108007	95576.6	173927	0.0777611	0.681086	1.4299
286	Amino acids, peptides and derivatives	104182	266893	145209	98166.2	234669	223433	79189.5	201017	368403	372183	284823	154151	259841	458577	353461	601804	0.0053337	0.474113	3.20496
287	Amino acids, peptides and derivatives	135877	147033	171659	179714	103456	181010	170425	61128.6	569266	324544	681707	408875	396195	470250	313436	327783	0.000261128	0.329405	4.43969
288	Amino acids, peptides and derivatives	14163	16705	10599.4	20849.5	12255.5	23090.9	16581.8	14887.8	156585	156716	308320	134882	168169	182840	255825	314754	0.000125721	0.0769523	3.68107
289	Amino acids, peptides and derivatives	191554	170633	161378	233626	171714	245586	217536	172037	1.13878e+06	1.31909e+06	392806	1.78394e+06	1.87679e+06	2.95371e+06	84069.5	3.15527e+06	0.00880366	0.123111	10.6853
290	Amino acids, peptides and derivatives	89298.2	67259.9	73237.1	74813.8	80870.4	67951.1	54750.8	73668.5	230342	153451	210039	165498	198520	204007	236148	219486	1.27823e-06	0.359724	3.8689
291	Amino acids, peptides and derivatives	1136.52	6263.18	7092.21	4254.78	3168.27	6265.89	7789.41	5075.45	4041.41	7899.66	2981.01	4200.07	4490.04	8019.2	3752.58	4318.44	0.872965	1.03383	0.0960878
292	Amino acids, peptides and derivatives	907.284	798.523	578.886	1077.96	881.622	754.147	671.748	656.806	550.932	740.682	806.655	759.648	1589.02	845.403	1658.01	1458.63	0.151578	0.752408	0.139001
293	Amino acids, peptides and derivatives	11029.3	9512.31	7666.8	12189.7	9882.72	11474.6	11893.7	10029.2	77244.7	133598	122232	128900	57312.4	132198	83892.5	67600.6	9.25084e-05	0.10421	3.16157
294	Amino acids, peptides and derivatives	22098.7	22920	19919.3	19433.3	20878.3	20509.1	20027.3	20404.4	22282.8	21121.2	22811.3	28149.9	19325.7	28726	34516.3	46964.9	0.0612288	0.74226	0.883884
295	Amino acids, peptides and derivatives	77739	81892.3	86371.3	69032.5	78147.7	73404.5	61833.9	65964.2	2.74406e+06	2.39352e+06	2.722e+06	2.23309e+06	2.67207e+06	2.54355e+06	2.68992e+06	3.07995e+06	1.61659e-08	0.0281991	14.0024
296	Amino acids, peptides and derivatives	6959.53	5950.34	6772.8	4974.58	6496.95	6203.5	6003.49	6377.25	5655.96	5971.56	3546.15	3883.5	4475.22	5259.91	3893.7	3327.55	0.00155277	1.3811	0.401593
297	Amino acids, peptides and derivatives	37794.1	37163.3	37400.6	32355.8	36825	46887.9	35860.8	40463.1	40467.3	42672.7	36428.7	35190.6	36394.8	46441.1	54552.5	77889.2	0.159248	0.823568	0.964515
298	Amino acids, peptides and derivatives	14350.4	16170.3	15406.3	13842.5	13281	10258	13042.7	11584.6	92180.3	53286.4	88905.7	76807.3	73230.5	67508.7	101335	102894	8.81674e-06	0.164499	2.82294
299	Amino acids, peptides and derivatives	13303.3	12478.6	14913.9	10214.1	11663	10811.2	13531.4	13274.3	23648.7	16549.3	14275.2	12809.8	14718.9	16522.2	11651.2	11810.8	0.0981799	0.821319	0.44901
300	Amino acids, peptides and derivatives	455.122	522.513	472.111	470.962	515.94	469.508	451.118	595.328	10686.8	7665.52	10006.2	12128.4	8647.53	9806.77	15251.4	17954.2	4.37448e-05	0.0428946	0.899809
301	Amino acids, peptides and derivatives	259623	282602	209589	210715	261106	240831	234735	204230	802200	671442	866352	674893	869492	682983	923142	904053	5.84576e-07	0.297664	6.49594
302	Carbohydrates	2.69433e+06	2.30661e+06	2.48354e+06	2.71168e+06	2.4606e+06	2.36907e+06	2.37888e+06	2.10185e+06	1.43798e+06	1.34725e+06	1.72781e+06	1.40791e+06	1.29517e+06	1.286e+06	1.883e+06	1.63044e+06	4.17066e-07	1.62344	8.2623
303	Carbohydrates	713913	829215	763809	739866	747811	731295	658952	620952	376435	340141	392127	381833	351089	386492	470187	387649	3.27262e-08	1.88137	5.05667
304	Carbohydrates	815056	868877	677043	786308	752983	946920	696533	636112	1.73059e+06	1.35509e+06	1.06436e+06	1.12528e+06	1.72684e+06	1.48449e+06	1.16934e+06	1.37602e+06	0.000146634	0.560172	6.32886
305	Carbohydrates	445819	479674	489981	400860	394083	447918	400954	423103	899525	831019	948215	932784	915477	931600	813817	813602	2.95732e-10	0.491444	5.84687
306	Carbohydrates	93525.9	89703.6	98556	101062	145479	95653.1	98666.1	83229.4	1.87592e+06	1.16046e+06	1.62063e+06	1.82907e+06	1.52797e+06	1.62322e+06	2.66725e+06	2.22035e+06	1.47539e-05	0.0554824	11.3499
307	Carbohydrates	99763.1	119690	130975	98582.6	73989.4	106536	87306.7	93482.5	184834	153120	142407	184792	155459	183712	190883	211036	6.39384e-06	0.576235	2.28071
308	Carbohydrates	4534.71	3200.37	3099.58	5618.17	5356.2	5452.87	5316.67	4085.93	45558.8	24000.3	25570.2	32805.6	25052.3	27111.2	48088.9	44575.5	7.82929e-05	0.134419	1.50013
309	Carbohydrates	2556.26	1382.03	1236.23	3142.18	1530.21	1144.6	2788.8	1092.18	8652.58	1505.88	3866.64	2548.17	6119.19	3683.4	3026.54	6957.14	0.0173095	0.409039	0.405655
310	Carbohydrates	1331.16	1214.82	1167.99	1150.23	1088.91	764.755	926.532	658.193	4625.74	4203.56	2736.09	2880.68	2663.39	3000.21	2573.35	3233.23	4.22318e-05	0.320362	0.392883
311	Carbohydrates	41641.8	36492.4	46020.2	43479.6	29205	38788.3	44514.9	42171.1	2203.83	2889.53	1084.22	2633.95	2745.42	1312.13	890.287	1196.89	1.23928e-07	21.5504	2.11486
312	Lignans and norlignans	9208.85	10930.6	7324.8	11047.5	9606.2	8227.48	8443.18	5656.17	25950.8	19856.9	21510	31004.1	16457.5	20425	28946.9	28359.1	3.22632e-05	0.365927	1.04545
313	Lignans and norlignans	3625.41	3628.49	2737.09	4096.02	3243.85	2918.98	3046.76	2278.6	11950.5	10354.1	9834.12	13133.9	7658.22	10260	19266.7	17924.2	0.000302379	0.254779	0.814456
314	Lignans and norlignans	944010	1.04989e+06	607171	1.03953e+06	720883	493954	565378	679811	845893	798009	541151	636266	611027	468140	236952	277812	0.0756228	1.38172	2.83956
315	Nucleosides	18200.9	50152.2	45870.7	13877.9	39031.6	22706.7	17201.8	27747.7	24047.2	31310.3	17827.1	15266.5	24634.3	22291.8	39828.6	20010.4	0.400643	1.20272	0.382653
316	Nucleosides	7779.98	7871.28	8623.66	12049.1	10340	10851.8	7809.51	10727.8	25028.3	23228.9	17988.6	37995.5	23578.7	39472.5	263.025	19848.3	0.0146937	0.405825	1.09692
317	Nucleosides	68200.7	98986.6	124266	68619.4	91831.4	65979.7	66094.5	53768.5	130506	119417	122664	100877	108752	127232	97683.3	116734	0.00291909	0.690302	1.76476
318	Nucleosides	27808.9	34536.6	43652.1	27026.3	32967.2	24830.7	29745.1	22106.4	42741.3	43967	43930.6	37424.1	39408.9	41760.6	1541.25	42998.2	0.282397	0.82606	0.725327
319	Nucleosides	33089.9	31374.8	2579.55	14295.2	3316.03	2662.83	2093.75	2289.28	62175.9	75890.4	56149.7	59418.8	56505	71556	43845.2	58924.4	1.57229e-06	0.189284	1.86135
320	Nucleosides	5484.68	4375.27	5106.68	5063.19	3356.57	3675.17	4873.94	3691.7	4560.76	5234.71	5530.85	4698.79	4954.06	4860.41	7247.34	3245.09	0.247805	0.883348	0.113558
321	Nucleosides	4580.83	6346.33	5292.8	4773.95	5491.68	5353.82	4574.96	2985.25	22838.5	194390	21860.3	21012.9	21898.6	24391.4	28516.9	31673.3	0.0958757	0.107478	1.43339
322	Organic acids	33901.5	42982.4	43620.2	58798.9	46841	14601.8	49614	28412.6	24060.6	27781	26664.4	27361.9	22552	21040.8	21243.2	22312.1	0.0143692	1.65153	1.15361
323	Organic acids	169133	170625	150354	178645	172049	169490	149488	137385	553014	517082	576434	559393	523559	569576	508056	497391	1.99188e-11	0.301351	5.37136
324	Organic acids	1.06044e+06	1.01563e+06	913633	1.02456e+06	1.03067e+06	983145	948245	844930	3.46773e+06	2.8996e+06	3.32215e+06	3.00957e+06	2.79437e+06	3.12245e+06	3.17885e+06	2.9356e+06	3.41385e-09	0.316262	12.7372
325	Organic acids	5.91371e+06	5.12436e+06	4.1686e+06	4.59229e+06	4.39786e+06	4.19311e+06	4.33502e+06	3.06269e+06	1.0741e+07	8.3792e+06	1.11678e+07	1.11557e+07	9.0959e+06	1.20464e+07	9.8452e+06	1.09573e+07	6.50932e-08	0.429168	20.8568
326	Organic acids	397684	392058	323573	425734	381970	350813	324402	326706	183980	189431	161509	170547	191750	131352	160935	141799	7.69849e-08	2.19555	3.84233
327	Organic acids	107641	116298	97131.9	85904.4	97902.2	86858.4	96370.9	87436.7	1667.89	127.681	2267.83	2113.21	1211.4	579.299	2223.72	1064.91	3.49103e-08	68.9009	2.70256
328	Organic acids	12756.3	10921.7	9735.44	9210.23	9553	7263.27	7870.82	9006.06	39753.9	34537	35083	30765.2	36353.5	35739.1	41601.4	40793.1	3.59445e-09	0.259029	1.43955
329	Organic acids	50598.7	71270.6	82008.1	84287.9	71196.4	88941.8	62524.4	65644.9	4807.4	5020.2	3980.45	6792.52	3015.72	3084.85	4213.5	4212.58	1.18163e-06	16.411	2.24989
330	Organic acids	8568.23	7150.05	7920.15	6204.77	10088	9486.94	7366.52	7521.74	95047.9	96414.2	115385	119218	104569	94857.6	82629.8	71637.9	8.08269e-07	0.0824695	2.60898
331	Other compounds	7106	5022.26	5619.93	6494	4346.33	5518.63	8244.42	5045.23	8348.2	6833.51	7818.36	4939.55	6747.46	4829.66	8134.5	6061.8	0.2524	0.882408	0.173491
332	Other compounds	46706.6	66219	85734.8	48232.8	62243.7	41732.3	37385	45636.4	51043.3	32154.2	69645.3	44190	39121.7	43117.2	47829.4	48347.4	0.308066	1.15566	0.492442
333	Other compounds	279057	311286	305824	246510	304469	238462	326197	183230	793835	510529	482807	820707	712945	863681	522094	1.35924e+06	0.0018607	0.361869	6.92525
334	Other compounds	61593.7	67028.4	74136.7	62411.2	53609.2	62157	48191	54386.2	44471.2	34326.1	49623.2	47048.3	40730.1	29303.1	31209.5	28812.1	9.73516e-05	1.58257	1.4979
335	Other compounds	22220.7	22125.9	15615.1	25194.3	21553.5	22540	18026.4	24111.5	11131.1	11575.7	8463.28	11356.5	12715.2	9553.62	11044.7	12391.1	8.08119e-06	1.94248	1.06151
336	Other compounds	1634.23	1831.02	1649.38	1846.62	1726.25	1896.91	1849.04	1416.38	20683.4	20962.4	24683.6	22881.2	25287.7	22742.3	18161.7	17882.2	1.5431e-07	0.0799254	1.52628
337	Other compounds	91419.6	73226.2	87520.5	63274.3	74635.4	71817.4	65751.3	68801.8	12912.7	9541.01	15057	16116.3	16170.9	19148.9	15429.7	18729.4	1.5286e-07	4.84499	2.62232
338	Other compounds	6127.19	6523.53	6647.46	5918.01	6270.25	8761.96	8958.24	5781.07	5067.2	4604.03	4036.48	5140.64	5898.46	5114.29	7056.1	5148.64	0.0114988	1.30718	0.375513
339	Other compounds	46798.7	41310.2	41714.1	42756	46792.3	45241.5	55227.6	50577.2	80834.6	43124.1	38206.5	75472	60375.7	62082.2	63238.1	56055.1	0.0336024	0.772688	1.00649
340	Other compounds	61752.4	31960.3	51656.6	55498.2	58244.8	42019.5	49207.6	50606.6	82804.2	78369.6	54372.5	79285.7	42046.3	62050.3	75268.9	75569.3	0.0100069	0.729302	0.983423
341	Other compounds	142505	148986	120056	146282	149521	110031	102405	143398	1.76584e+06	2.1177e+06	1.02307e+06	1.32504e+06	1.72355e+06	1.47263e+06	1.22256e+06	1.19695e+06	1.52643e-05	0.0897403	9.91931
342	Other compounds	81771.2	67750.7	48531	75364.5	65816.1	30573.4	20321.8	50109.5	456393	480538	277066	300979	237634	139853	79157.6	92888.1	0.00707467	0.213241	3.45805

## Sheet: Table S3
Table S3. The peak areas, P values, Fold changes and VIP values of 327 metabolites between edible and inedible parts of green asparagus.
Number	Type	GA_IE1	GA_IE2	GA_IE3	GA_IE4	GA_IE5	GA_IE6	GA_IE7	GA_IE8	GA_E1	GA_E2	GA_E3	GA_E4	GA_E5	GA_E6	GA_E7	GA_E8	P values	Fold changes	VIP values
1	Steroidal saponins	4849.89	5821.46	4658.74	6711.47	3003.36	5627.93	4648.4	3894.93	5420.41	3314.78	10318.1	7506.04	4079.32	9109.26	12933.6	6225.62	0.0770383	0.665729	0.378207
2	Steroidal saponins	9730.87	13910.9	9321.96	10637.6	2894.36	8250.83	6586.46	8019.22	698.901	280.402	642.87	298.207	648.203	877.169	471.758	569.749	0.000174228	15.4554	0.985277
3	Steroidal saponins	6303.24	6960.05	5290.82	5440.78	3819	4890.82	5846.32	3402.9	548	588.016	1111.6	901.78	567.274	1036.03	2137.44	734.351	4.16129e-06	5.50253	0.730886
4	Steroidal saponins	22945.3	9784.32	23288.5	23278.4	16527.4	11890.4	31574.1	18784.1	1272.35	2024.43	1667.21	1200.77	1121.01	1729.24	3423.07	1852.39	0.000163267	11.0614	1.45218
5	Steroidal saponins	4315.13	3968.24	5130.88	4065.88	3214.63	5281.23	5496.5	3354.1	1348.38	1217	2470.08	795.672	713.315	2564.94	1949.33	1893.87	9.25265e-06	2.68878	0.568784
6	Steroidal saponins	48423	32469.5	54741.6	32785.5	24958.7	45489.7	97401.1	30563.4	598.37	419.971	378.85	759.267	442.058	632.575	1423.36	18443.5	0.000969338	15.8816	2.19353
7	Steroidal saponins	14722.2	11047.3	13651.2	12819.7	7450.03	14363.5	15295.5	9458.3	1051.08	702.613	1078.92	1031.6	569.699	1204.44	1179.7	5412.08	1.08923e-06	8.07905	1.17783
8	Steroidal saponins	33713.2	22031.7	35673.4	27017.2	17040.5	35030.3	34788.6	19763.5	413.457	702.485	726.653	683.198	762.729	706.204	1392.76	2606.52	1.95184e-05	28.1534	1.85416
9	Steroidal saponins	6871.82	5604.17	11426.4	6188.62	6013.68	6583.91	10343.6	6936.89	1622.95	1296.98	2390.59	1710.62	1233.07	3798.26	3485.4	4252.98	0.000129452	3.03014	0.754997
10	Steroidal saponins	58866.5	40378.8	55696.1	36098	53362.1	50808.8	97730.4	40341.3	1464.49	661.007	412.774	465.971	850.662	1009.93	2332.26	49962.6	0.000165265	7.5802	2.31689
11	Steroidal saponins	33815.9	27660.4	53655.8	48503.3	24551.9	49543.1	44914.8	26967.2	821.166	427.633	1021.68	1257.2	1216.82	864.115	1953.82	6735.07	3.49867e-05	21.655	2.15051
12	Steroidal saponins	25167.9	23165.8	35436.9	24740	15033.8	24007.9	26744.1	16720.9	1806.48	1570.26	1428.2	1692.28	1091.67	2258.26	2785.22	886.166	1.90938e-05	14.13	1.66844
13	Steroidal saponins	2.90986e+06	2.2558e+06	2.78797e+06	2.91795e+06	1.88888e+06	3.28392e+06	3.32429e+06	2.20232e+06	12114.8	12604.8	13143.3	21537.6	14790.1	21475.5	46828.3	75783.8	1.83362e-06	98.8234	18.6112
14	Steroidal saponins	189477	108200	180794	140423	111638	175473	207260	127753	757.646	809.301	967.914	1250.65	753.17	766.99	3716.94	10897.7	8.07106e-06	62.2992	4.40232
15	Steroidal saponins	47755.6	33467.2	54290	37608.9	33168.4	44198.6	71943.1	34935.8	542.834	399.808	688.623	318.35	490.006	226.711	1575.49	6001.05	3.08001e-05	34.8894	2.31554
16	Steroidal saponins	338565	251056	318722	291586	207315	242661	349520	225741	3857.34	3999.71	3050.29	4441.74	3526.15	3590.86	3923.56	142306	1.03269e-07	13.1904	4.78977
17	Steroidal saponins	56614.4	29663	76696.2	36061.5	28529.6	71040.6	72993	45604	1379.46	1824.28	964.353	880.234	650.143	499.047	1359.17	3425.23	0.000173745	37.9899	2.46263
18	Steroidal saponins	535048	320083	498476	472766	376384	479514	566124	389678	2286.97	2439.77	2614.57	4319.31	3588.52	2836.5	9606.36	28526.9	1.21133e-06	64.7126	7.59843
19	Steroidal saponins	599624	521730	588635	576664	522555	620127	745654	528648	5462.47	3040.37	5685.82	6978.46	5895.53	8512.09	16744.3	33442.5	6.86289e-08	54.8455	8.66798
20	Steroidal saponins	42605.3	25849.4	41068.7	31210.4	25751.2	44729.3	55056.2	32483.2	510.5	115.449	0	234.293	250.216	204.933	787.483	1037.88	1.87596e-05	95.1217	2.15084
21	Steroidal saponins	18601	12049.6	26740.5	12903	9097.65	19946.8	45529.9	15096.5	706.888	462.116	450.297	433.631	660.712	448.452	798.949	2383.89	0.00232775	25.2115	1.42765
22	Steroidal saponins	572259	376467	577511	526316	340129	469132	581436	349283	3796.79	2394.08	1143.15	3297.78	2230.56	1787.13	2661.41	159534	4.95814e-07	21.4456	7.6212
23	Steroidal saponins	31243.9	27173.1	29923.5	29213.7	21579.3	30156.7	32325.6	22463.6	808.267	723.849	1281.22	947.413	609.772	778.424	1220.79	1489.2	2.36184e-07	28.5127	1.57089
24	Steroidal saponins	10011.1	9347.88	11427.4	10876.7	9007.69	9664.46	11665.9	7984.68	1175.91	3842.45	971.282	1954.41	970.512	3744.18	3884.43	3077.06	1.3944e-08	4.0767	0.977419
25	Steroidal saponins	11716.7	9160.88	11380.9	7765.56	5600.41	16473.9	11021.4	11839.5	160.05	190.299	319.175	435.606	488.654	526.176	334.529	442.749	4.28092e-05	29.3243	1.12464
26	Steroidal saponins	1278.44	984.496	731.666	821.111	530.018	1008.59	1359.67	781.938	427.154	455.037	284.351	342.977	216.123	320.937	593.757	1326.01	0.015936	1.88988	0.217148
27	Steroidal saponins	18714.8	18310.1	13852	20629.4	12888.6	23488.2	23619.3	14275.8	14138.7	17095.1	17810.5	45178.7	18178.9	33554.6	22670.6	12839.4	0.31762	0.803334	0.402768
28	Steroidal saponins	31485.6	21989	17536.7	19130	16548.2	21828.4	28421.8	20466.6	820.93	1277	892.859	1741.32	1456.87	2001.3	1308.93	2466.84	8.92137e-06	14.8258	1.61294
29	Steroidal saponins	32800.9	19576.1	17992.2	18287.6	15277.1	21494.7	27896.5	19450.3	140.434	536.911	545.011	398.499	171.485	647.788	459.146	987.884	1.78367e-05	44.4477	1.624
30	Steroidal saponins	16994.1	14386.7	10952.9	11706.5	7649.07	13521.6	16628.3	11000.8	1986.56	3771.8	4666.84	4550.75	5510.48	5845.84	4669.71	5297.39	6.48062e-05	2.83311	1.00434
31	Steroidal saponins	15283.5	10569.4	9513.23	10907.4	21889.3	11414.2	14200.9	9345.09	734.967	962.067	544.623	1092.1	1534.54	1473.85	877.977	2362.86	8.89609e-05	10.761	1.1642
32	Steroidal saponins	7305.59	4976.81	4390.24	4484.58	3255.72	5635.17	6417.88	3579.52	349.86	495.368	287.486	347.149	389.691	709.981	296.136	3038.18	9.26593e-06	6.77148	0.726831
33	Steroidal saponins	3863.86	6025.1	2914.26	5134.18	2459.2	7618.54	7531.81	2799.91	25583.6	16077	24188.8	71534.8	29944.3	19710.3	7524.61	13794.5	0.0185594	0.184043	1.32676
34	Steroidal saponins	2958.46	2966.5	2502.31	2888.5	1689.65	2114.67	2167.55	1079.62	3012.23	2864.04	2985.49	3430.33	2541.04	2799.83	2625.09	2164.32	0.0900114	0.819149	0.169524
35	Steroidal saponins	3816.85	2941.67	3861.34	4207.28	3301.61	4060.36	4500.16	3213.44	3204.8	3160.26	3493.64	2940.95	2957.57	2478.35	3748.28	2258.83	0.0158555	1.23347	0.250035
36	Steroidal saponins	1286.7	1546.2	1246.15	1593.15	788.298	1431.2	1026.69	836.063	1408.82	1065.59	1121.62	1678.98	933.916	1190.38	1016.01	690.319	0.602556	1.07126	0.0883576
37	Steroidal saponins	2718.64	2414.66	1966.61	1997.57	2147.26	2217.93	4236.22	1561.09	1288.49	1540.41	1534.23	1045.04	651.484	715.618	668.986	1299.06	0.00203156	2.20282	0.363597
38	Steroidal saponins	4957.13	4948.11	2611.82	4233.72	3946.76	3638.34	4100.97	1896.05	938.937	944.899	833.482	1118.51	501.005	234.336	375.007	678.495	4.5093e-05	5.39283	0.61331
39	Steroidal saponins	4885.88	4198.34	4434.98	3333.74	2292.87	2951.72	10018.3	2100.81	1182.63	1453.85	1130.39	917.943	976.375	785.592	718.91	1823.87	0.00943675	3.80627	0.548672
40	Steroidal saponins	9828.14	9465.9	6572.5	6844.09	7606.55	7256.15	19063.4	7595.25	2188.04	1161.83	1506.62	1515.79	922.894	1019.93	1379.99	5946.69	0.00111474	4.74575	0.881507
41	Steroidal saponins	42137.1	32611.1	25702.1	54039.5	32581.7	49178	23860.7	29489.9	4080.65	5888.07	5124.15	5529.13	5085.19	2212.86	7598.48	2688.46	7.34606e-05	7.57977	1.97176
42	Steroidal saponins	5474.15	5558.88	4508.28	6305.42	4522.91	5525.31	4925.37	5202.92	2249.04	2216.49	2086.66	2567.21	847	1508.23	2750.42	1080.62	7.7185e-08	2.7456	0.653858
43	Steroidal saponins	24707.1	22923.8	13399.7	19597.8	15448.5	23729.9	17395.6	19099.3	1109.22	711.042	1928.68	728.037	477.836	677.606	1310.93	777.192	3.16724e-06	20.2449	1.54126
44	Steroidal saponins	633.61	451.649	941.7	548.258	0	1039.37	203.472	0	371.64	113.275	0	293.008	167.662	73.6339	0	115.581	0.0502621	3.36452	0.160032
45	Steroidal saponins	8424.66	6708.06	6080.57	8613.88	4788.75	8124.38	6021.43	6395.16	1627.32	1690.14	1172.35	1710.04	553.915	736.305	2635.48	1427.49	1.25941e-06	4.77422	0.833213
46	Steroidal saponins	5028.81	5473.25	5150.37	5347.03	2224.18	3917.28	5524.26	5646.43	3550.96	1611.26	2855.1	2174.66	2115.46	2100.98	3013.36	1621.24	0.000357927	2.01185	0.507609
47	Steroidal saponins	8423.33	6513.33	6054.3	7600.26	5658.9	8143.55	4595.4	5576.99	2488.8	2718.62	2439.23	2005.66	1208.41	1331.86	1947.9	1422.41	7.09789e-06	3.37766	0.762621
48	Steroidal saponins	1220.21	1250.02	1086.03	1268.2	727.168	1449.6	2110.59	993.738	1404.52	457.056	1114.22	1013.49	266.118	357.21	718.833	386.873	0.018545	1.76722	0.222026
49	Steroidal saponins	14063.4	11278	8007.43	11413.5	12295	13649.9	9093.72	10280.4	3541.44	2066.49	2246.1	1381.32	1133.52	1576.37	2469.35	1280.91	9.6721e-07	5.7393	1.08818
50	Steroidal saponins	10231.7	11530.5	8905.39	12435.4	7645.55	11043.8	8013.89	7538.79	11333.2	8981.81	8897	8538.11	6498.29	6143.8	6325.89	5434.72	0.0715283	1.24443	0.442737
51	Steroidal saponins	26278.5	26316.3	22238.3	26509.5	14975.1	23977.1	17975.6	20790.4	7110.65	6654.37	5324.24	4898.36	5269.89	5462.04	5277.77	2971.89	3.92549e-06	4.16718	1.46936
52	Steroidal saponins	2854.33	2382.46	2022.77	3255.51	1471.4	2310.32	1547.39	1978.44	9254.63	8820.94	9706.99	5149.87	5987.2	7209.65	7178	6006.69	2.08999e-05	0.300479	0.790137
53	Steroidal saponins	7168	1897.9	1553.92	1988.44	1506.85	1783.3	1185.84	1486.25	13070.9	14327.1	12005.4	7219.98	5237.13	4929.6	8361.97	4271.27	0.00215371	0.267497	0.815167
54	Flavonoids	65680.5	78462.7	76314.5	81116.4	46701.6	76363.4	64140.5	50823.1	10862	11819.7	12558.8	8735.35	7971.13	8371.05	7625.51	5613.13	2.95168e-06	7.33588	2.74105
55	Flavonoids	37450	42347.5	40497.2	44429.7	26191.8	41107.5	30236.4	28282.5	15552.4	17793.3	18251.1	14965.9	12338	12949.7	13503.9	10472.5	1.84997e-05	2.50842	1.64936
56	Flavonoids	110841	28596.5	165710	355393	57667.4	120757	122451	145430	3561.38	2962.13	3685.22	4446.71	2430.25	5314.6	3020.11	3209.1	0.00609962	38.661	3.66595
57	Flavonoids	28563.2	5035.62	78268.5	180503	46812	157071	44404.2	40176.7	4565.18	3729.04	4391.82	4061.55	4334.89	6797.49	4543.46	3755.02	0.0184716	16.0547	2.49777
58	Flavonoids	19747.9	17044.8	25631.3	26187	28692.9	26543.6	23295.2	22628.5	3882.25	4826.75	2449.39	2551.25	2780.17	3436.63	2915.27	2997.59	7.42051e-07	7.34428	1.64465
59	Flavonoids	4090.68	4807.08	4617.53	5552.07	3064.13	4249.5	4182.42	3514.99	921.25	1413.36	1099.09	1304.18	834.132	951.253	904.03	1282.76	3.07398e-06	3.91254	0.637784
60	Flavonoids	8375.86	9229.15	9815.02	12163.6	6785.79	10686.1	8413.67	6512.22	5943.47	6598.02	6480.01	5068.19	4620.33	5899.38	5082.22	4437.11	0.000896324	1.63117	0.627626
61	Flavonoids	5170.14	3771.09	16886.4	11042.5	11514.9	10273	8955.02	10854.6	590.15	516.215	777.812	802.96	357.125	801.129	704.982	402.549	0.000354768	15.8427	1.01358
62	Flavonoids	4689.12	4483.58	4295.63	4886.12	2620.33	4227.84	3924.11	3225.72	6613.63	7021.93	6848.73	6572.75	5310.71	7786.44	5464.28	4817.02	0.00021672	0.641462	0.490201
63	Flavonoids	13632.3	12788.7	16909.5	17801.7	7914.79	14140.9	9608.94	9692.9	1759.08	1027.07	2381.77	2579.61	1781.94	1387.67	1274.69	1646.51	3.98275e-05	7.40622	0.982669
64	Flavonoids	3337.75	3108	3047.84	3044.38	1798.94	3111.84	2887.98	1821.8	5253.68	4843.81	4981.28	4789.85	3774.35	4685.76	3277.82	2921.06	0.00127861	0.641763	0.39509
65	Flavonoids	25169.9	27320.5	27388.9	31025.5	18332.6	28438.2	23464.1	18691.6	23527.2	28222.3	31767.8	30153.8	20289.6	27126.6	20708.6	16356	0.934321	1.00848	0.327397
66	Flavonoids	8440.09	8239.71	9181.32	10096.5	5201.25	8167.96	7903	5598.07	7953.39	9064.31	9403.14	8816.87	6592.32	8523.15	7022.88	5058.47	0.951181	1.0063	0.0105634
67	Flavonoids	26907.8	28471.5	23216.4	23505.2	16656.8	23279.2	20658.7	18361.5	98171.4	89548.8	76443	64402.5	65366.4	86880.7	71170.9	45375.7	3.32464e-05	0.303096	2.55504
68	Flavonoids	137386	139839	136060	161489	98625.9	144821	115345	104535	50681.3	59127.3	61693.1	48904.5	35712	40140.6	42112.7	34251.8	1.76448e-06	2.78593	3.26007
69	Flavonoids	3403.21	4886.5	3867.34	3677.01	3885.28	3329.26	3591.77	2518.76	780.7	422.257	305.61	586.687	256.552	523.711	276.346	305.896	9.37287e-07	8.43295	0.637572
70	Flavonoids	340793	378309	396334	488596	292614	406798	334203	298161	141074	116738	141359	110137	88820.9	149240	94251.8	81123.3	2.51557e-06	3.18161	5.67165
71	Flavonoids	1167.89	2228.44	1561.6	2302.18	784.527	1448.24	1356.96	1418.99	4023.37	5501.21	5858.93	4005.59	4320.6	4224.7	4432.17	2428.14	3.88001e-05	0.352606	0.570887
72	Flavonoids	2.34438e+06	2.8973e+06	2.39512e+06	2.56558e+06	2.12593e+06	3.00065e+06	2.46345e+06	2.0863e+06	2.54606e+06	2.43325e+06	2.36865e+06	2.59048e+06	2.02084e+06	2.49992e+06	2.29409e+06	1.81164e+06	0.296172	1.07077	4.10178
73	Flavonoids	12148.2	18507.3	13299.2	19441.8	15739.2	22227.6	15201.7	10764.8	17393.4	12052.7	17935.1	14772.2	12127.4	14894.7	8780.18	8633.57	0.186831	1.19458	0.550748
74	Flavonoids	2935.91	3272.21	3723.55	4122	2168.64	4996.77	2560.11	3091.57	3631.2	2486.57	4502.94	3986.96	2643.83	3793.23	2941.02	3333.01	0.891616	0.983601	0.0583744
75	Flavonoids	1780.27	2820.53	1370.42	3818.66	1479.55	3416.7	1697.64	1481.32	2211.36	2930.57	2264.4	2373.96	1045.35	1784.58	2595.69	1309.62	0.68935	1.08171	0.153482
76	Flavonoids	63660.4	68853.6	64456.9	72509.8	60123.5	95982.1	66337	47521.3	64359.7	59322.3	71561.2	64740.5	62959	67861.8	50884.4	53644.4	0.33381	1.08905	0.443121
77	Flavonoids	1.40405e+06	1.49374e+06	1.29092e+06	1.28284e+06	1.32825e+06	1.36431e+06	1.29773e+06	1.00619e+06	1.26815e+06	1.15401e+06	1.34572e+06	1.39488e+06	1.2469e+06	1.16114e+06	1.06229e+06	920996	0.144496	1.09566	2.4378
78	Flavonoids	778763	808593	789439	761434	675452	857735	764487	614957	767459	738562	834328	802090	666294	770525	688448	583189	0.537973	1.03418	0.752668
79	Flavonoids	129722	142220	139889	162067	101371	144078	106343	104902	223395	224010	219221	236697	175969	196453	170014	152360	0.000155374	0.644878	2.79663
80	Flavonoids	34987.9	39772.2	36586.7	41018.1	28734.7	38015.1	31739.1	29345.9	66658.6	59810.6	64033	62511.3	51763.1	53388.3	43250.5	42172.6	0.000226383	0.631667	1.52693
81	Flavonoids	18154.1	20919.6	13787.2	14255.1	12852.4	13430.2	16068.1	14034.8	6104.45	4968.63	3599.43	6589.98	5411.53	6382.84	5806.62	4964.84	6.99584e-06	2.81784	1.1236
82	Flavonoids	32637.6	34424.3	26585.2	29971.3	22369.4	31057.4	25606.9	23339.5	11417.5	9525.01	12613.9	13220.3	12680.6	11971.8	11283.8	9013.91	4.35794e-06	2.46375	1.21248
83	Flavonoids	26725.1	30124.7	25327.9	28715	21293.4	26146.4	21501.7	22569.4	23454.6	14872.3	20684.9	21285	17074.5	19231.9	12889.2	14201.9	0.00104374	1.40857	0.88769
84	Flavonoids	38271.4	41654.8	42279.8	42972.6	30968.3	40354.2	36806	30745.9	83887.1	79931.6	77675.8	81180.1	65930.9	89862.2	69520.4	59315.6	2.38041e-06	0.500661	2.16847
85	Flavonoids	38724.7	41316.3	43048.8	43884.3	32720.4	39343.8	35510.5	34454	94586.1	78469.3	75009.1	83514.8	87132.6	97775	66036.3	67117.7	6.20153e-06	0.475652	2.32566
86	Flavonoids	2518.36	4323.11	2101.74	2395.35	1591.92	2355.78	2792.21	2051.69	4171.94	3062.54	5605.3	3359.21	3778.93	5233.67	5007.33	4604.82	0.00083684	0.578058	0.433246
87	Flavonoids	1651.76	1920.8	2049.72	2328.63	1464.67	1988.65	1943.14	1753.72	6572.7	4840.68	4898.44	5044.14	3042.29	5689.03	3162.28	3859.44	0.000303407	0.406939	0.573067
88	Flavonoids	63660.4	68853.6	64456.9	72509.8	60123.5	95982.1	66337	47521.3	64359.7	59322.3	71561.2	64740.5	62959	67861.8	50884.4	53644.4	0.33381	1.08905	0.603012
89	Flavonoids	129722	142220	139889	162067	101371	144078	106343	104902	223395	224010	219221	236697	175969	196453	170014	152360	0.000155374	0.644878	2.80864
90	Flavonoids	35825	44644.2	42062.8	40880.6	31877.8	40260.6	35996.6	33326.1	72453.5	62110	63396.9	61837	57352	59949.3	49914.6	48595	2.58101e-05	0.641018	1.59024
91	Flavonoids	135679	127285	130939	194258	87767.4	123587	90206.7	98905.2	447210	309492	337798	373741	360754	302437	352481	281088	2.87129e-07	0.357551	5.21007
92	Flavonoids	94657	106803	97376.9	114352	74659.8	106774	81243.2	69434.3	282192	242958	289652	272805	240234	219344	216980	182066	1.34617e-06	0.382945	4.38858
93	Flavonoids	327070	369822	365154	382153	262618	336102	291301	233534	799814	764101	846052	933427	636014	798103	706711	707582	9.55302e-08	0.414702	7.67393
94	Flavonoids	1726.44	1751.29	896.696	3556.12	1295.3	1209.71	796.274	529.493	4970.56	3080.65	3535.05	4599.18	2638.33	2775.23	3072.69	2804.3	0.00074753	0.428058	0.44761
95	Flavonoids	9995.52	8845.57	8892.66	12539.2	5454.77	7921.63	6810.38	6839.29	3749.16	3131.61	2084.57	2447.86	3206.67	1027.18	3167.14	1297.21	4.87898e-05	3.34631	0.840653
96	Flavonoids	5724.07	6782.06	2926.54	7997.62	2892.55	4175.87	2655.51	3396.4	5153.55	4572.21	4864.32	4155.3	3437.65	2608.11	2404.14	2500	0.317636	1.23086	0.245895
97	Flavonoids	16432.9	19444.6	8759.8	22598.6	6717.59	10708.8	6398.37	8537.97	11310.3	10252.9	13396.3	10068.7	9129.12	4585.18	5824.67	6101.85	0.169105	1.40937	0.482634
98	Flavonoids	4405.65	5129.33	3210.79	4041.77	2349.3	1442.65	2082.99	2715.48	28148.5	31877.7	33195.7	21728.7	23106.3	11030.5	19256.1	12664.6	0.000246863	0.140203	1.5012
99	Flavonoids	2219.45	2479.8	1174.86	2862.01	1160.66	1576.67	1596.88	1592.76	14468.2	12593.7	13923.7	10198.5	8278.59	5476.87	7573.24	6061.59	0.000308568	0.186614	0.968497
100	Flavonoids	4868.01	5044.05	4473.19	8041.43	4055.55	4941.99	5539.66	5555.5	4233.3	3099.05	3863.98	2816.82	2769.24	3706.61	2396.23	3020.93	0.00137299	1.64128	0.462065
101	Phenolic acids	254250	267397	216442	223358	190332	221723	218687	197370	102329	185152	134070	135965	98907.8	108000	108902	69308.8	9.86804e-06	1.89847	3.01047
102	Phenolic acids	335596	357304	353644	341594	352442	322069	356020	375372	536372	491714	598373	521643	587913	628347	488974	445181	3.94416e-05	0.650001	4.05841
103	Phenolic acids	17786.9	16751.6	24472.3	11606.7	22036.2	16057.8	23337	22813.3	29822.9	27455.9	34185.7	9000.9	8451.12	47931.3	5692.11	30493.4	0.411956	0.802255	0.39976
104	Phenolic acids	8269.37	10293.8	9571.96	10529.3	7708.52	8437.02	8264.37	6534.05	4711.28	2458.35	3727.79	4616.85	5192.7	5160.72	1382.84	4140.34	5.75292e-06	2.21747	0.626029
105	Phenolic acids	218.696	53.1399	166.4	112.064	178.288	245.856	256.985	276.358	629.975	826.628	436.916	180.191	870.862	848.369	316.931	358.336	0.00578083	0.337448	0.159383
106	Phenolic acids	8135.86	6876.75	9115.94	7966.43	8882.74	7316.92	9083.99	8690.75	9310.73	6553.1	6530.64	7284.29	4823.32	6697.39	5323.08	5286.54	0.0107075	1.27525	0.422551
107	Phenolic acids	18298.7	580.427	3991.68	4316.77	4434.2	4931.2	4561.79	3570.98	4446.62	2865.32	3643.96	4072.17	2424.59	4549.44	3270.12	2580.25	0.303429	1.60437	0.286851
108	Phenolic acids	50762.9	60952.7	57995.1	64925.4	40897.7	59576.7	45913.2	45488.8	9194.06	4361.59	4973.83	4493.83	3803.28	3826.18	3263.76	4046.77	4.93374e-07	11.2349	2.09885
109	Phenolic acids	1.00726e+06	1.16841e+06	1.68988e+06	1.82066e+06	899791	1.44716e+06	1.16883e+06	849839	828401	471086	685387	525204	535689	448967	267075	389862	0.000388219	2.42115	7.77385
110	Phenolic acids	3799.47	3494.57	2454.07	1464.84	3033.62	4204.48	3795.39	3874.22	22068	20994.8	20922.4	20824.8	19047.4	24144.5	19227.7	17189.3	2.24091e-09	0.158866	1.50109
111	Phenolic acids	8117.14	8842.62	6040.25	6626.45	5401.93	6358.76	7348.94	6517.11	42386.5	39117.3	29168.1	35713.1	34204.5	31043.4	40893.8	31491.3	3.09334e-07	0.194541	1.599
112	Phenolic acids	21220	22766.5	30124.3	34179.4	22606.1	26446.6	22140.6	21662.6	6611.68	8227.81	6797.31	17563.3	23873.8	7677.41	13232.3	11284	0.000315167	2.11138	1.207
113	Phenolic acids	5718.33	5931.8	6147.15	6365.99	4560.38	6435.84	5063.39	4549.39	9418.42	8486.48	8406.15	7197.43	7862.71	5757.12	6744.89	5661.97	0.00617593	0.75203	0.413431
114	Phenolic acids	78563.8	66202.9	91765.3	91472.6	62036.2	91867.4	83539.7	69630.6	1.65348e+06	1.69212e+06	1.37412e+06	1.44965e+06	1.21412e+06	1.33507e+06	1.17863e+06	984275	1.26606e-06	0.0583633	10.7901
115	Phenolic acids	29359.3	28076.7	35724	37878.3	22796.4	29679.2	31486.5	26520.4	12860.7	15352.3	19400.5	15901.6	12292.6	13584.7	13196.2	11755.8	6.79203e-06	2.11222	1.18001
116	Phenolic acids	154676	193654	134064	159012	82890.6	132257	104305	94153.5	402453	263613	301665	208692	246264	218449	146314	178458	0.00446221	0.536654	3.0879
117	Phenolic acids	117295	140886	128282	131749	100857	134144	118979	105079	65954	63397.3	39542.4	45453.6	48593	49872.5	49194.5	33618.1	3.08262e-08	2.47019	3.04503
118	Phenolic acids	12905.7	15451.2	9330.81	11347.2	3988.32	8446.2	7354.56	6855.9	151387	140955	163221	142674	148586	157897	127399	142959	2.59498e-10	0.0644042	3.53552
119	Phenolic acids	39424.7	37740.7	42397.3	44250.1	39804.4	43032.9	40953.9	40666.5	48242.8	39269.9	43481.3	43803	41418.3	46564	47812.9	41656.1	0.0492786	0.931929	0.394712
120	Phenolic acids	298199	205807	424776	464160	272302	402237	333456	259294	42679	42223.6	48742.9	43966.4	40394.2	48857.6	33350.7	27826.6	3.63094e-05	8.10945	5.03688
121	Phenolic acids	16108.1	12769.9	17902.7	20207.6	18519.1	20706.6	19513	16695	2743.29	2254.65	3110.38	2449.57	2910.92	2736.51	2234.57	2192.43	5.26417e-07	6.90286	1.40076
122	Phenolic acids	14504	9621.25	10865.3	11818.4	8064.78	11895.7	9623.47	7637.79	4086.32	3071.3	4377.21	3011.46	1391.09	1425.68	2292.15	1964.98	4.25077e-06	3.88668	0.832078
123	Phenolic acids	2168.81	2820.68	1231.14	2667.35	1329.82	3003.74	2262.87	2008.34	3429.92	1686.4	2857.71	3050.84	2553.71	3547.95	2744.11	2962.89	0.0482588	0.7661	0.178966
124	Phenolic acids	21220.6	27826.8	21166.3	35296.6	15925.2	20579.3	27058.5	16854.5	1497.77	1713.93	1455.27	1482.37	1225.48	1516.22	1139.77	1271.57	2.81357e-05	16.4503	1.38484
125	Phenolic acids	23763.2	31145.1	21816.5	22475.2	18112.8	22804.4	19770.6	18425.5	44022.9	44467.6	28703.5	32268.2	32387.2	35273.8	32327.8	19590.9	0.00499886	0.662772	1.08888
126	Phenolic acids	43417.3	41746.6	39683.2	41232.4	28540.9	15958.5	37456.7	39227	2724.08	3953.43	5302.61	4306.4	4177.46	6538.27	4578.32	3688.95	2.37188e-05	8.14479	1.95638
127	Phenolic acids	235339	235580	254771	263755	196255	253791	232696	216489	210852	174721	203318	192706	218003	275693	185878	170413	0.0423135	1.15757	1.27609
128	Phenolic acids	25237.9	24463	17509.6	20772.8	5104.19	17361	17429.5	17861.9	5966.42	5891.48	5691.71	5525.03	7342.35	8316.79	2212.44	5911.56	0.000593825	3.11026	0.981995
129	Phenolic acids	6331.89	5558.28	7224.22	7139.93	5267.28	6452	5365.99	5884.72	2409.56	2531.75	3694.31	2886.87	3582.81	4134.97	3137.8	3710.37	1.14109e-06	1.88682	0.495347
130	Phenolic acids	56069.2	49089.6	52379.1	66865.4	41925.4	47885.6	41148.6	40953.8	20772.9	19549	35540.5	18542.3	28090	14112.8	16039.6	14313.3	7.56107e-06	2.37372	1.85468
131	Phenolic acids	117610	108925	114788	129006	114986	129222	116413	105270	85949.7	103006	142055	91705	67456.8	64673.1	68931	76365.7	0.0139895	1.33719	1.71852
132	Phenolic acids	97260.1	112524	103274	122103	102526	136058	99340.5	88010.4	173238	49468.6	164012	161908	114557	144719	97872.5	102353	0.280445	0.854153	1.14911
133	Phenolic acids	989.668	825.809	376.314	1862.76	864.413	995.426	3000.12	1361.68	96041	49769.5	70164.1	34747	36506.2	40521.9	26481	24435.6	0.00108373	0.0271379	2.00743
134	Oxylipins	65587.8	175065	62254.8	80567.2	90938.2	66147.1	126767	47359.4	147095	129968	134071	136844	107967	136846	129535	82217.6	0.053535	0.711454	1.47224
135	Oxylipins	757533	801724	525533	567818	352165	554577	546537	471086	1.35067e+06	1.162e+06	1.45246e+06	974059	1.02278e+06	1.32906e+06	982974	861967	3.94312e-05	0.500983	7.0218
136	Oxylipins	81875	80473.3	49641.8	48822.3	26022.2	31854	34389.2	37953.1	48532	63087.2	64555.9	53516.4	41455	49413.6	49296.5	35545.5	0.834094	0.96455	0.506071
137	Oxylipins	61018.3	58710.1	57885	58102.1	40482.9	52705.1	56564.7	44427.5	26543.2	53200.2	38141.3	26117	22242.5	26365.9	35244.1	19148.8	0.000353886	1.74045	1.35928
138	Oxylipins	11725.4	12568.9	7904.32	7929.42	5253.9	7719.07	8241.73	7488.04	9261.07	11589.5	12369.4	7776.54	5803.18	8529.26	6895.42	6021.44	0.952497	1.00857	0.296691
139	Oxylipins	2618.07	4166.64	3675.24	3960.64	2835.95	2287.66	2619.12	2462.65	3335.66	3545.48	2664.65	3807.41	3169.66	3598.08	3029.57	3183.39	0.478698	0.935144	0.0695156
140	Oxylipins	7503.36	8690.91	8051.21	8578.75	6013.42	9686.45	9570.83	7657.83	20108	19672.9	15660.6	18183.4	16192.9	18415.6	18192.7	18784.5	1.91916e-09	0.45281	0.931908
141	Oxylipins	2670.25	5488.35	5699.46	6885.11	4226.56	5032.79	5161.28	2407.54	3498.3	3561.06	2756.18	3945.53	3709.6	4907.65	3465.2	1234.45	0.0679982	1.38752	0.315015
142	Oxylipins	366390	445601	261568	230501	159641	242926	281810	103194	414940	420185	467497	475675	376962	483830	429745	245461	0.00650557	0.631094	3.28041
143	Oxylipins	65587.8	175065	62254.8	80567.2	90938.2	66147.1	126767	47359.4	147095	129968	134071	136844	107967	136846	129535	82217.6	0.053535	0.711454	1.47224
144	Oxylipins	6984.71	8292.13	5709.31	5590.8	4453.72	5798.8	5240.84	4998.44	18500.3	24741.3	21669.9	27992	14855.2	22665.7	19214.2	13221	4.63866e-05	0.289014	1.11561
145	Oxylipins	235554	383959	218679	253983	142865	217707	240011	172634	178779	122181	221108	193450	184713	125670	126059	149290	0.0312036	1.43354	2.05817
146	Oxylipins	4540.77	13528.3	7274.92	4351.91	1904.3	7337.66	10420.4	6883.51	17232.9	16231.6	18442.4	13103.3	10252.2	13750.9	608.82	12820	0.0309065	0.54901	0.615567
147	Oxylipins	5362	4600.54	2791.25	4267.53	4117.76	3590.82	3832.72	3707.04	7148.27	8300.83	7412.74	7064.63	5579.91	8145.81	7100.46	6576.16	2.28427e-06	0.562887	0.512608
148	Oxylipins	8209.25	9881.69	4791.38	4028.22	3840	5178.93	7036.28	4806.75	4257	3748.81	5681.99	3736.57	3908.23	3962.62	3789.34	2847.69	0.0392026	1.49606	0.380407
149	Oxylipins	14497.9	15877.5	10818.5	9190.75	9161.08	12086.7	13644.1	10981.4	8565.1	9028.25	7706.17	9500.21	5392.39	10920.1	6294.79	5653.75	0.00245762	1.52643	0.541554
150	Oxylipins	11209.5	13758.4	9480.52	9528.2	5580.34	9746.67	8564.55	9296.91	3485.08	3554.83	3505.02	3252.01	3336.72	3576.71	3371.41	3500.96	0.000123983	2.79759	0.864011
151	Oxylipins	2849.13	5620.09	3700.41	3307.18	2534.46	4083.76	2534.24	1630.48	2566.35	3116.25	3230.15	2760.41	2017.63	3000.66	2455.66	1897.35	0.192041	1.24782	0.197091
152	Oxylipins	13850.6	16590	11692.6	11769.1	8774.46	13713.3	13892.8	11571.8	14234.7	11693.6	11182.9	14298.2	13514.4	9364.88	10232.5	7020.18	0.308227	1.11266	0.300759
153	Oxylipins	4630.52	5740.09	3543.41	2984.07	1887.46	3380.09	2974.38	2874.13	4380.84	5252.52	4484.57	2751.15	3996.98	3055.44	3270.87	2751.42	0.657228	0.935558	0.153392
154	Oxylipins	2259.17	2314.98	1911.38	1652.33	1802.68	1612.71	2233.68	1358.98	2288.75	1499.39	3709.13	1406.96	1936.65	2336	2015.98	1679	0.468395	0.897702	0.103119
155	Oxylipins	4935.89	5310.09	3760.68	3685.37	3578.82	3056.44	3698.27	3170.63	5557.5	5236.79	7445.01	6025.8	5258.51	6017.31	4616.73	4161.02	0.00301414	0.703906	0.351511
156	Oxylipins	5923.35	7635.87	6301.77	6127.81	4551.85	6229.97	6161.26	4998.24	4649.5	4582.08	4361.99	4516.36	4454.39	4853.13	5605.65	3614.81	0.00321778	1.30821	0.310343
157	Oxylipins	176893	235882	85426.6	78917.2	66041.7	93772.2	109004	89258.8	115650	119868	146189	100273	95197.6	128056	97115.3	82255	0.780652	1.05719	0.739919
158	Oxylipins	9656.72	12535.6	7204.29	9200	6062.51	8671.71	7830.99	7712.05	3313.12	4271.4	3737.66	2741.32	2403.22	3615.18	3842.25	1958.98	4.38737e-05	2.66095	0.671609
159	Oxylipins	2572.15	3004.78	1917.93	2521.23	2307.35	2341.59	2418.64	1724.91	3618.31	4483.74	3937.54	3463.68	3697.76	4868.08	3407.19	2592.57	0.000405268	0.625517	0.336408
160	Oxylipins	751379	1.11886e+06	526102	558459	338813	568941	576142	501798	857866	990670	972697	847771	679861	861207	725857	531609	0.0761202	0.763892	3.65479
161	Oxylipins	89888.3	138247	74751.7	57465.5	52219.5	68333.4	72900.9	74503.6	55345.6	73654.4	76799.6	64927.5	66214.1	71210.5	57036.8	59356	0.223568	1.19782	0.76515
162	Oxylipins	269999	226348	114736	106773	76718	117043	117211	112907	94111.3	109536	109819	80402.1	85173.1	105687	81966.5	74020.3	0.0753894	1.5414	1.81624
163	Oxylipins	8842.1	8688.85	5503.3	8105.65	4084.25	6192.59	5124.91	5376.59	6845.83	2331.43	5829.58	6542.06	5231.44	6556.49	3358.82	3069.36	0.113765	1.30563	0.298187
164	Oxylipins	2742.16	2601.23	3547.93	3247.5	2972.46	3289.71	2034.64	3025.56	6791.4	3449.93	3907.18	2933.5	3368.47	2939.14	2881.37	2837.39	0.190978	0.805994	0.233112
165	Oxylipins	14825.3	15123.6	14130.1	16526.4	11177.4	16331.5	25365.8	14750.5	63572.5	10639.9	48543.6	10357.9	8621.26	97739.8	28751.8	22990.1	0.112323	0.440327	1.06476
166	Oxylipins	124280	129562	118983	123151	86234.4	108442	108703	90631.8	13994.5	15525.5	12137.4	11741.1	15408.9	17428.3	18097.3	8990.74	2.89632e-07	7.85349	2.96233
167	Oxylipins	10013.2	12566.1	7929.32	9738.71	5161.53	7334.96	7437.89	5915.86	14047.8	11204.8	11326.8	10874	8056.72	8249.28	9404.88	6464.25	0.180367	0.830074	0.401953
168	Oxylipins	20647.5	21566.5	27266.1	21784.2	22022	21366	22975.3	19276.8	28593.9	25864.8	27247.6	27877.1	27832.5	28408.8	21545.1	22746.6	0.00551983	0.841935	0.54147
169	Oxylipins	5724.47	7793.09	5253.29	4637.22	3684.53	4946.41	4821.36	3359.68	9031.74	1652.39	5508.43	14806.3	8092.65	11919.3	10168.9	7251.21	0.0438553	0.587747	0.428216
170	Oxylipins	208998	285743	163611	97306	76763.5	103003	42880.9	93449.1	54361.3	51567.6	57368.5	58062.1	55486.9	56517.4	110569	37553.7	0.0362161	2.22593	1.94429
171	Oxylipins	24275.7	25426.5	18906	15376.7	18255.5	21260	19477.9	19218.2	40984.5	40882.7	31966.8	34069.4	33219.3	33366.3	37140.7	36578.9	2.30763e-07	0.562775	1.15513
172	Oxylipins	5397.24	4990.16	3016.09	6356.59	2876	3895.89	3557.34	2806.01	21024.3	20945.7	18083.5	16701	13184.4	15918.5	15094.7	10960.6	6.79999e-06	0.249372	1.05439
173	Oxylipins	178722	2.5824e+06	145665	157536	101341	132616	1.46618e+06	111953	125293	1743324	116067	109698	104674	1.31824e+06	109963	1.20259e+06	0.988844	1.00964	0.172526
174	Oxylipins	13204.1	13727	5816.58	7018.53	4337.78	4931.19	5356.78	3016.3	18966.3	8046.32	6680.87	13323.5	4647.07	5920.69	9442.85	6445.43	0.379747	0.781352	0.374549
175	Oxylipins	248920	330337	202299	207731	166472	166150	196204	60427.1	99064.1	97602.2	91099.7	72901.8	76942.4	80737.3	81260.1	52357.2	0.00345217	2.42121	2.91181
176	Oxylipins	50978	55279.4	48165.1	44924.6	9723.45	51467.9	65239	29663.3	23232.9	18551.9	21712.6	16402.2	11169.9	17339.8	13749.3	3334.25	0.00172015	2.83236	1.50689
177	Oxylipins	16768.5	14683.2	10137.6	19659.2	8781.18	16269.2	10512.7	10457.6	2430.58	2399.11	2225.83	1804	209.454	194.521	1830.86	1033.12	4.03521e-05	8.84514	1.02007
178	Oxylipins	229592	260829	189928	212146	172771	236233	233164	192580	62350.6	60399.8	59800.9	64593.7	51520.2	59848.7	64675.9	48205.7	7.07255e-07	3.66411	4.50104
179	Oxylipins	3350.83	2419.35	1431.24	2837.53	1318.95	1765.92	1291.98	1377.88	22056.5	16606.7	17654.3	13595.8	11875.4	12007	18472	10420.2	2.19486e-05	0.128731	1.08427
180	Oxylipins	726.059	708.435	563.24	585.69	368.18	325.133	288.144	274.379	928.519	1047.03	667.489	775.255	691.826	493.39	627.039	744.452	0.0105733	0.642554	0.125029
181	Oxylipins	150.935	113.304	39.5635	163.902	235.808	240.481	197.526	205.399	322.474	262.859	49.6891	167.792	200.177	185.164	66.6463	232.024	0.673184	0.905903	0.0155604
182	Glycerophospholipids	12162.2	10658.3	5674.56	9661.67	7729.13	9761.8	9291.99	6923.65	5400.04	11987.8	4766.08	6348.08	2869.31	4039.61	4992.89	3537.74	0.0152967	1.63543	0.563887
183	Glycerophospholipids	4511.36	6243.48	5658.65	8146.93	6320.71	6263.16	6963.56	4926.04	16517.2	12361	11914.7	10109.4	8106.83	8988.75	8211	6147.96	0.00793996	0.595383	0.702005
184	Glycerophospholipids	8865.5	5496.73	8778.48	8828.78	6610.23	5884.29	9469.6	7706.4	3804.61	2827.8	2524.12	4658.14	2309.1	4702.1	2098.14	2271.85	1.27909e-05	2.44643	0.605023
185	Glycerophospholipids	10133.8	5437.03	12994.6	12811.7	9275.12	15186.6	6558.95	4870.14	7915.28	4383.01	6065.48	5718.34	4908.74	8012.88	4204.4	4030.28	0.022304	1.70801	0.498167
186	LysoGPLs	3281.07	5204.01	1843.79	2130.54	2345.32	2015.76	3346.41	2478.05	6523.45	10866.8	7810.41	6138.77	7283.98	20476.5	5955.74	7047.18	0.0086514	0.314065	0.642394
187	LysoGPLs	32522.9	44638.6	26691.3	27133.3	16434.6	25679.2	26825.1	21119.7	10792.7	10931.3	8943.54	10042.4	8740.54	10760	8235.36	6687.06	0.000387462	2.94205	1.21301
188	LysoGPLs	9004.65	10349.1	7229.15	5808.13	5110.05	9308.97	9143.72	5690.3	8572.08	7608.69	6562.67	8342.14	4732.56	11120.3	5371.18	4233.44	0.564062	1.09022	0.258524
189	LysoGPLs	1574.48	1207.91	1944	2104.41	1218.5	1806.04	879.704	1499.27	1918.35	1243.45	1318.9	1078.37	1484.3	2094.61	1846.96	1276.75	0.986377	0.997767	0.0320543
190	LysoGPLs	14711.1	9704.57	16570.2	16213.6	12138.7	13068.2	14781.8	13027.5	6089.65	4848.62	7303.81	6077.43	6213.55	7312.55	8592.47	4623.67	5.80465e-06	2.15848	0.78338
191	LysoGPLs	186579	234682	126902	150039	1.34364e+06	176635	260912	226262	107517	242061	201657	106047	95591.9	32301.4	19991.6	91764.6	0.165127	3.01657	2.6829
192	LysoGPLs	28458.5	68705.8	67673.4	87369.6	200826	24919.2	66838.7	17955.1	37116.9	62646.8	67319.6	85738.5	33836.2	21233.1	13698.6	34402.6	0.277854	1.58078	0.826458
193	LysoGPLs	17920.6	11110	30161.8	51027.4	11947.8	31822.4	16683.7	15311.6	68875.9	53378.3	64422.2	21246.6	8455.95	2274.08	23192.9	10819.2	0.447628	0.736094	1.02573
194	LysoGPLs	5171.02	2275.82	1217.43	1244.61	4722.05	1176.68	3562.13	1963.92	9830.5	30353.1	20939.3	35784.8	7763.37	3745.12	2421.75	8523.43	0.0283826	0.178732	0.839103
195	LysoGPLs	1091.28	935.659	613.503	822.479	713.223	533.997	694.208	598.637	1539.29	1025.2	1239.49	1152.39	785.998	761.414	859.289	1571.73	0.0168812	0.671865	0.165705
196	LysoGPLs	55355.3	34602.8	22841.6	50671.9	14693.8	52726.3	13499.5	15184.9	11055.1	8592.11	6091.51	7096.32	12060.9	8461.66	15286.7	6861.68	0.00899031	3.43782	1.50174
197	LysoGPLs	215.719	0	0	102.655	350.021	152.512	328.892	26.956	152895	109152	90667.4	84604.4	44191.2	42680.1	44155	26326.3	0.00177061	0.00197883	2.96435
198	LysoGPLs	1723.62	2456.89	1330.32	2732.83	713.67	2181.99	898.136	706.123	5397.18	4100.08	4617.63	3582.36	1022.17	900.227	1940	809.617	0.123051	0.569692	0.352635
199	LysoGPLs	6951.92	5869.43	6125.69	8924.26	4946.24	7556.96	5282.24	4758.14	7436.13	9117.29	7482.79	5232.8	2795.27	2752.23	5087.62	3082.36	0.372264	1.17281	0.327129
200	LysoGPLs	10413.9	9750.29	10194.4	9198.09	6407.1	13257.5	1715.37	9218.37	8302.5	14789.8	13972.6	7922.96	4910.34	5351.27	9660.73	4997.87	0.986778	1.00353	0.244827
201	LysoGPLs	3.12425e+06	3.00954e+06	2.0925e+06	4.89288e+06	1.74881e+06	4.41959e+06	1.76863e+06	2.22074e+06	1.1796e+06	957138	1.08363e+06	420735	108164	162961	627958	153606	0.000639427	4.95908	16.4599
202	LysoGPLs	13067.8	11642.7	5834.99	25695.9	5765.29	16951.9	5512.32	7004.62	14585.8	13114.8	14306.5	7291.34	1985.13	3531.51	19211.4	4224.51	0.631265	1.169	0.42484
203	LysoGPLs	3900.65	4538.15	1691.35	9658.14	1950.07	6455.87	1161.55	2498.31	16359.2	14096.3	14053.7	2693.84	1213.19	1591.97	3687.95	1176.3	0.291612	0.58051	0.58734
204	LysoGPLs	1541.25	1209.01	1812.75	1385.43	763.553	1062.86	1398.84	1681.12	2081.04	1913.19	1585.58	1741.05	1604.93	1954.83	1824.55	1317.78	0.0194365	0.774074	0.159463
205	LysoGPLs	6989.66	6825.04	5172.97	8227.32	3683.02	9466.8	3760	3694.24	2955.28	7563.37	4437.55	2143.13	1482.27	1850.64	1924.15	1379.25	0.0150254	2.01465	0.474117
206	LysoGPLs	9282.25	7240.11	7296.17	10376.1	7194.64	10546.7	7125.72	8209.15	4039.65	3304.48	3261.25	2012.34	1377.18	1634.23	2720.7	2069.88	6.36469e-07	3.29441	0.721087
207	LysoGPLs	38909.6	24948.8	45447.8	62060.5	33228	57892.7	30127.5	37730.4	65245.4	55452.7	48461	29360.3	8972.96	4766.7	35792.8	16369.6	0.384853	1.24931	0.926446
208	LysoGPLs	4736.13	4270.2	3986.03	3053.73	3186.99	4381.24	3324.34	4441.48	9448.86	8244.37	8505.46	6098.28	4239.22	3704.06	9109.53	3233.14	0.0225845	0.596775	0.439703
209	LysoGPLs	19514.9	11529.5	12957.6	20708.2	10051	17433.3	10389	12394.9	15245.5	11893.4	14195.9	8163.9	2680.85	3838.25	7755	3716.76	0.0214897	1.70365	0.70644
210	LysoGPLs	278996	166569	300272	371256	258634	322797	235791	306778	184721	151301	145375	71040.8	25552.2	13974.3	98972.7	42548.6	3.18569e-05	3.0554	3.97051
211	LysoGPLs	187698	128674	115254	229441	110021	182836	100895	145129	76066.4	67160.5	70844.8	30011.3	8689.3	11985.3	39147.7	14920.4	9.16045e-05	3.76365	3.04843
212	LysoGPLs	9751	6029.57	7020.91	13446.6	7815.17	12376.1	8724.09	10304.1	30614.8	22747.2	26875.5	11610.8	3767.11	4446.28	18306.5	5207.58	0.161189	0.6107	0.718877
213	LysoGPLs	5826.55	8026.82	2878.4	3357.24	3067.2	5119.51	3922.75	2470.27	32735.3	26404.9	29923.3	19131.2	17782.4	34014.3	21454	17810.5	3.10337e-05	0.173991	1.35507
214	LysoGPLs	12006.3	10707.8	11753.7	15777.4	7753.78	13778.2	6498.11	8214.66	49174.9	26827.5	25430.1	14818.4	5193.03	2552.24	18179.2	8282.47	0.184039	0.574845	0.844481
215	LysoGPLs	7409.61	6183.14	5345.34	10035	4459.54	6542.28	4293.32	5521.35	39058	30556.8	33253	21240	8696.26	23310.7	16272.4	7482.51	0.00481177	0.276809	1.40508
216	LysoGPLs	6074.12	7420.98	6729.99	8520.95	14608	6557.84	7179.54	5279.52	17425	20172.5	10357.2	20386.7	5917.81	6893.67	9502.34	4761.68	0.130441	0.653668	0.675886
217	LysoGPLs	11563.4	9466.41	9958.86	9729.68	9106.73	11565	9891.56	9280	321880	241977	126533	93676.4	63101	44461.8	117373	40055.4	0.011338	0.0767942	3.60517
218	LysoGPLs	105611	82863.1	103900	181871	79467.6	225495	66159.8	94907.3	202332	143554	138013	63414.7	21301.2	12762.8	83010.8	29260.4	0.34159	1.35555	1.79658
219	LysoGPLs	117530	154612	69447.2	199491	52575.2	154582	41239.4	58561.2	110878	99519.3	100974	36929.9	19919.8	22230.3	44346.3	12907.2	0.0708171	1.89419	2.00303
220	LysoGPLs	12930.5	11144.6	13585.9	12890.8	10934.8	11150.3	12116.7	10398.8	7707.79	7738.78	8738.94	5940.21	4952.56	6894.66	6145.28	5172.89	9.24395e-07	1.78552	0.681266
221	LysoGPLs	186616	337065	223536	369237	553708	288937	444722	318190	249423	340955	224340	298879	163074	91820.1	11791.9	259140	0.0326033	1.66035	2.64172
222	LysoGPLs	217967	121648	299846	517095	235812	387568	229595	199627	149215	114756	128512	107570	49287	82372.4	81703.5	51191	0.00406574	2.88927	3.65442
223	LysoGPLs	42105.6	26435.6	76576.8	41282.1	21776.8	33586.5	25230.3	27502.3	27637.1	13357.6	15985.2	11588.6	6965.25	8794.7	10729.8	10833.7	0.00652389	2.7811	1.26552
224	LysoGPLs	260320	489112	506027	442774	988317	340982	740824	228393	441178	369561	281814	376412	169633	101343	49422.4	213493	0.0342791	1.99553	3.58633
225	LysoGPLs	9381.8	8671.21	16256.9	11402.4	5061.25	9180.99	5936.52	5306.68	1991.54	1522.27	1514.86	891.684	640.715	870.608	1052.14	547.007	0.000555174	7.88387	0.791133
226	LysoGPLs	1668.95	1661.94	1387.96	1684.82	887.102	1686.14	1261.11	1156.3	2309.57	2885.02	2515.81	2562.64	2454.35	2197.37	1844.4	2565.43	1.38324e-05	0.589323	0.274109
227	LysoGPLs	390636	772278	1.86722e+06	1.23685e+06	1.03225e+06	632207	1.7275e+06	548654	996285	1.02658e+06	1.15462e+06	2.4413e+06	506201	466451	376330	992296	0.91995	1.0311	1.46413
228	LysoGPLs	61932.4	35409.6	28351.5	29459.3	68127.3	26088.2	47914.7	23115.8	105878	206612	151485	146677	70552.5	50790.9	32292.6	75567.6	0.0171577	0.381493	2.03905
229	LysoGPLs	3980.72	3862.56	3749.34	5872.32	3010.42	4268.61	3474.9	2878.23	14778.3	9110.7	9869.52	6044.33	4433	8167.16	6710.34	3521.1	0.0164292	0.496486	0.599894
230	LysoGPLs	52988	47643.2	60233.6	77658.6	52250.1	63444.4	47205.1	42850.7	534205	406997	493835	264766	148940	31050.8	257064	154957	0.00792484	0.193852	4.23503
231	LysoGPLs	15964.1	16690.1	18668.5	21652	36232	23092.2	29729.8	21865.2	34839.1	31569.3	60873.3	81483	14814.5	17137.8	10554.1	23413.8	0.246885	0.669472	0.724043
232	LysoGPLs	14237.9	14141.2	16640	21667.2	13156	20245.2	10534.9	12945	94173.4	75278.1	39936	43262.1	29436.2	10414.9	54621.7	29402.6	0.0127686	0.328179	1.49537
233	LysoGPLs	24449.3	15921.9	16136.1	35025.4	14441.4	27411.1	17567.3	18659.8	56896.3	49024.1	22141.1	27131.8	17178.2	8951.63	32871.8	15356.9	0.273948	0.738885	0.734399
234	Sterol Lipids	3000.06	2463.47	1917.25	2509.02	1338.33	2095.01	2357.98	1791.48	9911.42	8969.27	9302.58	11269.1	7446	10218.6	9884.86	4734.09	1.80911e-05	0.243568	0.919109
235	Sterol Lipids	1415.79	1640.23	1412.78	1354.53	756.151	1444.63	1021.29	927.42	5269.49	4581.59	3651.37	2859.42	2983.7	2196.61	3706.23	2901.16	0.000249972	0.354279	0.505043
236	Glyceroglycolipids	35367.3	38295.8	46477	49542.2	40379.4	49954.9	31056.5	37867.7	41659.9	30342.3	31708.8	28708	13068.5	18325.1	25143.9	14427	0.00266976	1.61734	1.14917
237	Glyceroglycolipids	14486.5	18342.3	9570.74	40824.6	3806.25	30980.2	4271.09	7042.29	14338.4	13094.5	15027.3	4496.16	4118.2	3105.66	7316.5	4650.11	0.15326	1.95511	0.772424
238	Glycerolipids	158513	159174	125152	181400	132134	198614	123931	136976	90829	79297.1	83048.6	51988	41583.6	32594.6	51555.6	43809.3	3.99773e-06	2.56137	3.41441
239	Glycerolipids	37252.3	47162.7	23653.9	40882	19367.1	54369.2	19111.3	30768.3	59691.3	51684.8	62313.8	21083.7	18723.5	17169	36643.4	15126.9	0.886453	0.965056	0.823923
240	Fatty Acyls	382023	463730	252838	314891	226192	250412	323746	254383	187343	183979	158321	170421	170311	141118	172873	126218	0.00123719	1.88329	3.30252
241	Fatty Acyls	7107.05	9390.38	10708.2	9615.59	11454	8765.26	10343.9	10063.6	10969.2	9673.35	13468.2	12680	12656.6	13836.6	12026.4	11762.5	0.00257148	0.797834	0.412817
242	Fatty Acyls	7440.88	8928.6	7690.24	16120.4	6548.4	11353.4	5942.55	7068.58	201.527	286.128	404.762	258.036	222.965	488.762	368.99	323.626	0.000177114	27.8273	0.849644
243	Fatty Acyls	6343.65	4095.95	4722.99	4162.29	5414.89	4885.8	3134.12	4752.71	3682.21	2788.77	4173.66	4564.81	4542.34	7193.21	8874.28	6743.58	0.450196	0.881341	0.234077
244	Fatty Acyls	1513.41	1660.14	1446.69	1487.02	1194.02	1361.94	1338.33	1416.17	8851.49	7203.1	8709.35	6801.59	2985.93	7353.46	6181.97	4380.75	0.000176068	0.217615	0.67565
245	Fatty Acyls	2378.99	2837.28	3039.66	3137.85	1627.64	3097.15	2048.83	1870.7	4263.76	3080.11	3430.13	3266	4609.54	1937.85	3352.54	3074	0.0294905	0.741769	0.205575
246	Fatty Acyls	614.966	514.749	678.041	653.974	449.634	842.09	297.605	577.977	416.885	839.164	599.731	824.889	1042.36	909.774	1043.43	1502.45	0.0317055	0.64483	0.158456
247	Fatty Acyls	3786.52	2605.06	1784.17	4004.75	1440.72	2619.96	1157.26	1409.67	708.246	1356.58	1464.43	1229.05	1952.39	1610.7	2390.08	1894.38	0.10004	1.49201	0.190207
248	Fatty Acyls	4931	4386.62	5703.01	3986.34	5656.62	11586.2	5858.8	2960.18	5046.4	13815.4	18919.4	15986.8	6742.98	4399.27	10451.7	10136.6	0.0343393	0.527129	0.478451
249	Fatty Acyls	71929.5	70593.5	52846.6	78018.1	33842.3	68745	39731.9	49941.1	155518	155254	162725	86217	75962.7	53515.8	73493	51808.9	0.0384376	0.571702	1.92303
250	Fatty Acyls	1956.13	1900.26	1151.19	2021	1340.85	2151	593.297	1291.85	1534.52	2129.93	1998.25	2027.84	855.152	2180.23	1947.98	2066.58	0.259429	0.841599	0.0917257
251	Fatty Acyls	1279.84	1463.87	1274.53	1563.37	863.371	1374.36	667.841	846.208	1355.31	1420.74	745.43	1194.97	1080.59	1902.67	1229.41	1350.93	0.483019	0.907913	0.0485286
252	Fatty Acyls	1994.34	3133.24	2143.48	1607.31	1552.84	2392.21	1316.69	1349.3	6263.96	4199.02	4019.63	3440.29	2235.47	3052.17	3518.1	3215.44	0.00302666	0.517278	0.379574
253	Fatty Acyls	2086.83	2105.79	2575	2074.36	1021.44	1449.09	1557.82	1314.35	7078.8	6350.32	3645.95	5696.74	747.84	2246.01	3035.62	3194.45	0.0234062	0.443331	0.402478
254	Fatty Acyls	107789	108130	73781.2	127301	50670.9	114258	50077.7	65463.9	129218	154541	152074	73612.6	59804.9	48360.2	94264.4	43427.1	0.715753	0.923434	1.30795
255	Fatty Acyls	2137.96	3381.03	1202.95	2001.37	689.397	2461.19	574.274	860.535	7604.77	9454.55	11554.9	7087.77	1718.47	4252.56	6493.05	1525.33	0.00797476	0.267828	0.611199
256	Fatty Acyls	24042.9	49294.4	9409.17	57984.3	13343.1	27138.3	7498.77	9976.51	37832.9	45250.9	78644.4	32058.1	19144.1	15539.5	24583.9	16476.3	0.394574	0.737162	0.856944
257	Fatty Acyls	4464.82	4900.99	3007.94	4530.6	2006.52	4143.42	2337.9	2755.1	24691.6	40507.9	31387.1	13770.2	8630.86	6806	12208.6	6423.95	0.0142589	0.19489	1.04783
258	Fatty Acyls	33302	28337.2	36045.1	33988.6	55577.6	45695.7	55819.7	47397.6	29399.5	28151.5	25871.4	27357.5	44514	36445.9	46004.1	42880.6	0.168945	1.19791	0.612886
259	Fatty Acyls	325213	327656	321039	300952	360526	312040	300616	360348	281426	227761	241621	289547	285792	288075	313136	308951	0.00423244	1.16638	1.98205
260	Fatty acyls	25763.8	27431.4	24813.6	27755	16396.7	27516.1	23426.1	23121.9	630.8	1383.99	1104.75	1150.2	1817.19	1735.3	1168.6	1991.05	3.91821e-07	17.868	1.45014
261	Fatty acyls	1526.3	2475.46	941.04	1459.22	657.581	774.936	1152.09	647.457	14235.3	18552.2	15029.1	12884.7	11873.4	11171.4	17931.2	13984.8	1.0172e-06	0.083295	1.07265
262	Fatty acyls	751379	1.11886e+06	526102	558459	338813	568941	576142	501798	857866	990670	972697	847771	679861	861207	725857	531609	0.0761202	0.763892	3.65479
263	Fatty acyls	20679.2	65651.1	13885.4	12523.8	10825.9	15476.1	15241.9	12281.7	29294	53644.6	27126.1	28714.3	21280.6	30353.3	23823.2	16756.7	0.309233	0.721084	0.619834
264	Fatty acyls	611.879	545.413	396.167	579.709	302.761	140.037	290.868	347.866	14241.1	13583.1	16026.3	13430.5	9409.27	8459.78	11901.6	7425.6	1.47051e-05	0.0340262	1.00552
265	Fatty acyls	387.053	493.368	277.621	395.877	200.027	467.727	263.914	270.507	5468.36	4163.66	4567.1	5244.8	4495.34	2618.51	2612.11	1461.68	0.000226952	0.0899757	0.550765
266	Fatty acyls	1630.89	3392.02	1550.52	2100.19	1031.33	1997.64	669.972	1201.05	8320.49	7274.07	7406.35	3873.1	5069	3756.06	5206.73	3852.51	0.00028396	0.303264	0.569312
267	Alkaloids	921.726	2788.21	1414.29	2308.01	464.418	738.937	3056.15	851.978	2603.19	3442.55	2710.21	2868.54	2034.2	4107.35	4262.35	2774.47	0.00457079	0.505737	0.304534
268	Alkaloids	1145.96	849.641	666.653	704.655	530.119	1269.05	964.063	802.147	3008.56	3941.74	2291.25	2719.45	3620.42	2843.44	2506.47	1902.93	2.75888e-05	0.303591	0.409068
269	Alkaloids	2125.74	2982.32	1600	1959.94	1036.92	2058.44	2258.51	1560.43	7610.05	7414.13	8881.92	7043.8	5596.96	8101.2	6509.39	6443.7	7.74779e-08	0.270521	0.683081
270	Alkaloids	2491.81	2935.15	1331.87	816.249	965.039	805.195	2456.85	2558.26	22780.3	24163.7	17090.6	16953.4	25444.4	23739.2	16697.3	24576.4	7.8891e-07	0.0837609	1.32114
271	Amino acids, peptides and derivatives	53161	13034.1	14164.9	95195.8	86900.2	17377.2	82320.9	7054.12	185845	26098	20950.8	20603.6	24802.4	20105.4	143249	117439	0.406049	0.66037	0.683723
272	Amino acids, peptides and derivatives	693.425	1328.79	0	725.165	0	276.244	0	0	4539.16	3967.55	1768.1	1691.46	5486.88	1941.62	6194.11	5603.36	0.000870163	0.0969352	0.623067
273	Amino acids, peptides and derivatives	21805.5	21250.1	32007.7	32657.3	27462.1	29292.4	22564	22851.1	258527	218976	208809	199604	204176	269019	202609	160189	8.64006e-07	0.121894	4.16063
274	Amino acids, peptides and derivatives	98065.3	104158	91318.3	81744.7	88963.1	94483.4	88953	99118.3	726763	736441	612255	842887	726417	700129	685486	643513	3.18432e-08	0.131621	7.4787
275	Amino acids, peptides and derivatives	42541.9	50786.6	44248.5	55888.9	37090.9	53079	38747.3	31368.5	38691.8	38334	39655.5	34931.6	36888.7	43557.6	35587.6	30232.3	0.0614346	1.18757	0.670966
276	Amino acids, peptides and derivatives	260447	298756	370652	414090	377834	385286	326216	310579	1.00345e+06	1.04717e+06	925283	987693	914272	860366	827648	1.02111e+06	3.8703e-10	0.361653	7.3009
277	Amino acids, peptides and derivatives	7043.19	19249.1	13578.7	2496.8	1417.98	2002.28	865.259	389.065	441180	553776	567770	479298	328607	391642	465545	520931	7.68361e-07	0.0125488	7.6345
278	Amino acids, peptides and derivatives	93771	98535.3	125929	106486	97322.1	104660	79858.2	90324.1	242276	185178	187158	204719	186143	241961	188065	160925	4.86203e-06	0.499169	2.98381
279	Amino acids, peptides and derivatives	9007.95	7507.45	8457.31	5684.25	634.399	424.941	6404.16	2107.65	71180.8	117529	3176.61	2333.77	2994.5	114323	124555	79980.7	0.0172556	0.0779504	2.23221
280	Amino acids, peptides and derivatives	179043	149195	182441	204697	156722	241604	311851	194945	67244.5	109154	98858.4	75930.8	74148.3	64410.7	72438.5	64604.7	0.000179353	2.58539	3.18457
281	Amino acids, peptides and derivatives	24360	23218.8	0	32352	23624.6	23496.6	511.103	0	245236	264174	340532	318335	201997	297555	258879	305215	1.78449e-07	0.0571539	5.7643
282	Amino acids, peptides and derivatives	41338.4	41211.8	39746	44977.6	16534	29691.9	35515.5	35456.9	121751	255893	97918.7	161372	207734	145894	194957	222291	0.000122324	0.202067	4.11593
283	Amino acids, peptides and derivatives	235832	249846	1932.06	237703	234002	192805	773.049	49800.4	99974.3	119240	121993	165890	147178	95172	93476.4	125404	0.492789	1.24203	1.12018
284	Amino acids, peptides and derivatives	439798	454028	451758	346194	392691	353381	431392	447752	1.58357e+06	1.43312e+06	1.62057e+06	1.66804e+06	2.15748e+06	1.99766e+06	1.50468e+06	1.67799e+06	9.79224e-07	0.243126	10.803
285	Amino acids, peptides and derivatives	125188	135302	123536	104496	115676	32008.4	121079	120265	200386	217108	153364	108888	73128.7	240522	173828	4925.67	0.255866	0.748666	2.07567
286	Amino acids, peptides and derivatives	275679	277623	247891	302559	250478	321201	278504	254154	903675	702183	576240	576364	568544	559195	807537	693382	3.64529e-05	0.409883	5.75264
287	Amino acids, peptides and derivatives	193212	153687	275985	348479	153599	175427	170997	122602	341216	203369	312945	239392	307850	401228	166441	194930	0.0904484	0.735448	1.98173
288	Amino acids, peptides and derivatives	396798	432255	80791	182384	344371	265899	339181	312405	22326.1	128836	45483.2	61443	41047.9	30503.2	73401.4	44138.2	0.000468104	5.26431	4.22862
289	Amino acids, peptides and derivatives	4.02282e+06	4.7766e+06	2.68243e+06	868703	1.70552e+06	4.18191e+06	3.70702e+06	3.60881e+06	494148	502159	797407	948690	605669	569475	610162	714692	0.000984968	4.87445	16.5722
290	Amino acids, peptides and derivatives	57461.6	42354.4	52969.4	67307.6	50694.6	59950.6	65023	67296.9	1.04816e+06	919485	834326	844966	836964	949167	957541	779873	1.8989e-08	0.0645784	10.4533
291	Amino acids, peptides and derivatives	9021.7	6918.08	13514.3	10628.1	8158.42	12078.3	10547.7	10652.4	12500.9	9911.88	9825.79	13427.6	11543.9	14613.8	10497.2	9424.33	0.223725	0.888535	0.237386
292	Amino acids, peptides and derivatives	582.582	638.174	418.106	594.299	546.61	438.362	1390.93	487.23	4624.1	1786.46	1788.66	2824.97	2391.37	2424.09	1862.15	957.94	0.0026592	0.273117	0.434278
293	Amino acids, peptides and derivatives	177091	399403	142271	128380	97190.9	173653	162329	174828	50396.3	126110	149424	58816.5	103257	100619	94726.8	56998.9	0.0306097	1.96548	2.59281
294	Amino acids, peptides and derivatives	5630.01	5534.93	5160.6	4704.01	4252.37	5212.88	5699.08	4287.89	12723.8	15784.5	21368.1	15228.9	14439.5	17114.4	15457.3	13177.5	6.55134e-06	0.323094	1.1417
295	Amino acids, peptides and derivatives	513714	507999	743721	247085	603948	700507	616168	509743	5.2152e+06	3.99197e+06	6.53531e+06	6.44097e+06	5.19619e+06	6.4064e+06	4.33641e+06	5.30327e+06	1.42029e-06	0.10231	20.812
296	Amino acids, peptides and derivatives	2659.11	3561.34	3064.91	2874.56	1944.59	3565.36	3350.74	2377.68	14895.2	13713.7	12013.9	15088.7	17739.7	13337.5	12899.1	10727.1	6.85436e-07	0.211912	1.17369
297	Amino acids, peptides and derivatives	42734.8	41684.3	47401.6	59048.6	35989	54593.3	41167	40163.3	204906	169162	170858	176273	164488	217001	164633	159337	4.75083e-08	0.254288	4.1334
298	Amino acids, peptides and derivatives	3554.53	3687.87	1124.55	3056.29	2145.54	1973.45	2692.4	2875.84	74954.5	79672.1	98212.2	78875.8	71312.9	76345.9	68966.5	65982.8	1.11583e-07	0.0343638	3.09057
299	Amino acids, peptides and derivatives	9620.12	9000.01	11042.3	10815.7	9258.22	9944.28	7431.78	9020.95	49072.5	38079.5	40920.5	44211.8	39300.5	44605.3	41125.6	30391	4.34551e-07	0.232322	2.01862
300	Amino acids, peptides and derivatives	74155.6	39558.7	119606	132274	100294	122927	105592	84003.1	2034.9	2831.24	1952.64	2629.04	2397.06	1666.71	2022.08	2384.92	4.84875e-05	43.4416	2.85484
301	Amino acids, peptides and derivatives	127206	120466	131621	119549	89821.2	120785	123839	93733.4	4.35049e+06	4.4725e+06	4.04218e+06	4.02273e+06	3.9607e+06	4.30827e+06	3.60861e+06	2.59581e+06	4.08624e-07	0.0295594	18.6782
302	Carbohydrates	2.3468e+06	2.65929e+06	2.05059e+06	1.8951e+06	1.54149e+06	1.87252e+06	2.09167e+06	1.91171e+06	1.17976e+06	1.07533e+06	1.03123e+06	996087	915010	1.21092e+06	994566	1.00687e+06	3.7065e-05	1.94645	9.14018
303	Carbohydrates	772227	797919	830379	818121	683805	819034	800413	733798	566985	530681	492338	496839	467098	572005	509314	423685	2.84559e-08	1.54121	4.93737
304	Carbohydrates	1.44578e+06	1035496	660742	748702	491944	788405	886209	779282	649162	916129	879342	846362	763457	844221	706169	766979	0.598541	1.07294	1.16002
305	Carbohydrates	608813	615772	677228	567912	625293	627887	646780	593926	1.41019e+06	1.22111e+06	1.31453e+06	1.37906e+06	1.34058e+06	1.55036e+06	1.30966e+06	1.20732e+06	6.94927e-08	0.462472	8.11738
306	Carbohydrates	1.79905e+06	1.19004e+06	2.35858e+06	2.08652e+06	2.17925e+06	2.15047e+06	2.03691e+06	1.9379e+06	402291	614784	597804	494061	461109	427059	461645	502800	4.4069e-06	3.97287	11.3539
307	Carbohydrates	167170	121983	162398	166258	147723	172689	167509	151965	328403	292106	282746	311848	248163	331986	309544	232346	2.74794e-06	0.538134	3.45761
308	Carbohydrates	135235	104427	121514	121198	103293	110205	119867	81027.8	5434.42	12266.4	8718.4	9610.93	7514.14	7898.9	9976.66	14165.1	2.73242e-07	11.8644	3.05545
309	Carbohydrates	21318.8	2081.86	2357.8	27581.5	1619.58	21374.6	5044.86	14041	1359.08	2230.81	3597.95	617.727	2218.54	1316.22	1276.1	5241.83	0.0347434	5.34318	0.744269
310	Carbohydrates	5267.33	11075.9	7636.59	13540.8	14678.5	11448.4	8117.04	7868.71	1831.2	2405.71	1805.66	1163.76	809.13	649.752	1240.84	855.612	0.000108735	7.39971	0.840529
311	Carbohydrates	605.376	525.742	392.854	65.6442	456.531	453.54	646.571	462.31	3824.91	3102.94	1593.17	2103.62	6734.89	4557.7	2835.5	1706.06	0.00218312	0.136385	0.550693
312	Lignans and norlignans	68781.1	51198.9	50395.9	54187.5	43710.7	57602.4	60767.5	62628.6	10328.2	9576.75	13759.6	10436.7	9520.16	11733.5	13114.7	9621.87	4.38439e-07	5.10008	2.00668
313	Lignans and norlignans	22480.7	20550	19075.2	24933.5	16112.1	22734.2	20482	18699.7	10881	11341.4	12500	12361.5	9731.81	14215.4	8721.68	7591.19	2.4184e-06	1.88986	0.918911
314	Lignans and norlignans	32996.6	32900	28397.2	33513	27330.8	56260.2	33588.2	27650.4	547412	384909	367739	190562	352899	190969	229992	203678	0.000477628	0.110461	4.78803
315	Nucleosides	33752.5	50064.8	22180.7	12401.6	18085.2	2943.99	14718	24980.5	32165.8	23091	29752	27073.2	27003.2	26578.3	30979.3	22873.6	0.364376	0.816009	0.43454
316	Nucleosides	63069.8	80087.7	111642	78735.8	58059.9	72565.1	82716.1	69347.8	42678.2	37074.3	35588.2	26016.7	38295.8	70604.9	33059.9	20892.4	0.000205584	2.02565	2.01147
317	Nucleosides	351261	301200	258275	405047	310490	281067	286176	309023	338591	250825	317094	260722	230815	350391	252175	174069	0.147451	1.15076	2.19263
318	Nucleosides	148137	99332	93036	164516	146332	118373	101319	110604	122877	82564.5	119529	94853.9	74703.3	123023	83424.7	70389.9	0.0511693	1.27261	1.67338
319	Nucleosides	178658	177578	161382	131352	160741	135701	164550	131101	87181.3	10063.8	107604	102601	132344	65291.4	69680	87593	0.000467567	1.8737	2.28825
320	Nucleosides	1717.96	12810.1	12609.1	8807.18	10896.2	14041.4	12078.8	9812.67	15640.1	20258.1	14574.4	10614.8	10954.9	11411.7	14367.5	14138.6	0.0589022	0.739312	0.403497
321	Nucleosides	7481.21	7717.28	8470.61	10106.2	18189	9493.98	6721.79	6850.59	23288.4	22741.2	22944.7	16989.8	10809.9	16390.8	17012.5	13585.3	0.00124414	0.521906	0.810561
322	Organic acids	12649	12275.4	1478.78	8345.02	4808.48	10471.5	7674.66	8625.76	34358.4	19673.2	29204.3	31048.5	26264.2	32804.5	31896.4	34557	2.15922e-07	0.276592	1.62479
323	Organic acids	389630	397819	399692	408298	298008	393264	369266	314041	505538	495075	487464	417098	361004	510582	388368	366530	0.024455	0.84097	2.45845
324	Organic acids	2.27605e+06	2.28062e+06	2.18654e+06	2.4484e+06	1.78309e+06	2.41474e+06	2.30079e+06	1.83621e+06	3.01177e+06	2.88406e+06	2.80055e+06	2.57368e+06	2.24409e+06	2.75847e+06	2.35912e+06	2.22343e+06	0.00990448	0.840388	5.95443
325	Organic acids	6.89445e+06	7.34117e+06	8.9894e+06	7.1629e+06	5.78209e+06	6.99324e+06	4.12174e+06	8.23706e+06	1.2496e+07	1.33757e+07	1.17939e+07	1.54119e+07	1.20225e+07	1.27767e+07	1.10077e+07	9.59113e+06	1.09518e-05	0.563816	21.1969
326	Organic acids	300905	313101	281815	384303	301072	366981	302368	307390	160144	249518	117956	229019	230129	158536	199806	218917	3.61489e-05	1.63548	3.18637
327	Organic acids	301.931	301.988	240.387	517.279	379.054	894.772	185.067	208.277	2514.99	2137.02	1144.7	5958.24	1859.44	2966.09	1868.17	1890.08	0.00418999	0.148916	0.385115
328	Organic acids	10134.8	6008.57	7252.46	5966.71	7304.18	14281.3	8219.42	8747.19	140857	77606.9	128712	156974	171147	166333	148230	126590	4.49577e-06	0.0608308	3.42691
329	Organic acids	3161	2418.03	4000.81	2154.22	1750.02	3886.45	2277.42	1629.51	6471.28	7284.84	6136.21	6205.89	6360.27	6164.34	5378.15	5375.66	9.75631e-07	0.430921	0.544508
330	Organic acids	110155	108996	118793	108561	89904.7	123063	93998.8	93864.5	97293.6	92202.2	93292.6	95524.8	79354.5	86467.2	82522.5	70772.1	0.00407931	1.21494	1.24518
331	Other compounds	24465.3	24074	23006.1	20333.2	12743.9	23288.6	21106.4	20981.2	9168.14	6745.98	8469.68	7519.84	7341.45	7812.56	7102.97	5744.11	8.04442e-06	2.83782	1.31215
332	Other compounds	29001.6	26093.1	30327	27444.6	23287.8	24230.8	20148.8	26079.7	207585	108659	125676	113516	90101.1	107214	135888	72854.1	0.000290451	0.214888	3.3969
333	Other compounds	1.9481e+06	1.1408e+06	1.83032e+06	1.47726e+06	1.33668e+06	2.33518e+06	1.8579e+06	1.25605e+06	1.22284e+06	1.18978e+06	1.42306e+06	1.45054e+06	1.40123e+06	1.832e+06	1.25241e+06	1.12964e+06	0.112511	1.20922	4.11153
334	Other compounds	74273.6	104489	81609.6	73822.9	75378.3	71982.7	72573.8	67155.5	83361.3	78751.6	72724.1	83014.6	69916.8	81552.5	74923.6	51654.5	0.573923	1.0426	0.617705
335	Other compounds	12168.7	13037.4	12970.6	14235.3	14083.1	13272.9	13561.6	13098.2	8816.14	7699.02	10637.8	9410.56	8736.94	9352.81	9241.4	11429.8	4.44964e-06	1.41293	0.684269
336	Other compounds	7457	6500.16	9507.3	8993.89	8404.7	10539.9	8277.64	7197.03	10840.9	9290.7	8620.33	9810.78	8720.16	8809.66	7157.83	7651.22	0.431311	0.943246	0.20147
337	Other compounds	51612.2	36003.7	29828.7	29572.6	25414.1	35820.7	37662.1	27395.6	14439.7	28239.5	21956.4	27677.7	23692.7	26271.8	24935	17014.9	0.00742641	1.48354	1.00422
338	Other compounds	9197.15	10418.8	8341.37	12040.5	8336.89	10373.6	11502.4	10109.4	14519.2	16601.3	11877.9	15143.5	18271.1	20467.4	14584.9	13495.3	0.000392132	0.642764	0.772188
339	Other compounds	141784	148523	93716.6	95317.8	92383.9	41906.2	126963	109486	33647	28518.5	40516.2	36231.5	35118.6	44417.3	46539.7	32211.7	0.000614581	2.86029	2.72449
340	Other compounds	39424.7	37740.7	42397.3	44250.1	39804.4	43032.9	40953.9	40666.5	48242.8	39269.9	43481.3	43803	41418.3	46564	47812.9	41656.1	0.0492786	0.931929	0.394712
341	Other compounds	13136.9	13674.8	13359.4	14887.5	13508.1	13420	16096	15124.4	535046	240335	366293	234713	261982	225000	106421	177362	0.000892939	0.0527243	4.6604
342	Other compounds	10863.1	12173.8	7338.2	18481.4	7020.22	13112.8	4628.96	9757.11	305518	183838	203875	106376	134706	28788.7	96703.5	56988.6	0.0045761	0.0746562	3.23235

## Sheet: Table S4
Table S4. The peak areas, P values, Fold changes and VIP values of 327 metabolites between inedible parts of white and green Asparagus.
Number	Type	WA_IE1	WA_IE2	WA_IE3	WA_IE4	WA_IE5	WA_IE6	WA_IE7	WA_IE8	GA_IE1	GA_IE2	GA_IE3	GA_IE4	GA_IE5	GA_IE6	GA_IE7	GA_IE8	P values	Fold changes	VIP values
1	Steroidal saponins	3880.74	2766.22	5206.18	3448.66	3362.58	5871.31	4777.98	4107.89	4849.89	5821.46	4658.74	6711.47	3003.36	5627.93	4648.4	3894.93	0.209491	0.852239	0.260466
2	Steroidal saponins	10418	7582.59	11053	9518.34	5696.22	8282.64	8609.35	6221.81	9730.87	13910.9	9321.96	10637.6	2894.36	8250.83	6586.46	8019.22	0.854346	0.97159	0.230015
3	Steroidal saponins	74646.4	71060.1	83090.5	66194.8	61766.7	79333.4	72848.1	51862.6	6303.24	6960.05	5290.82	5440.78	3819	4890.82	5846.32	3402.9	2.75826e-07	13.3671	2.75851
4	Steroidal saponins	113611	100767	110818	115309	101826	115337	96632.4	87347.6	22945.3	9784.32	23288.5	23278.4	16527.4	11890.4	31574.1	18784.1	1.09206e-10	5.32444	3.16723
5	Steroidal saponins	77231	67508.9	88744.6	65093.5	67588.7	70029.8	73590.6	59694.9	4315.13	3968.24	5130.88	4065.88	3214.63	5281.23	5496.5	3354.1	1.02108e-07	16.3519	2.79865
6	Steroidal saponins	93781.3	285720	97683.8	210216	103796	312439	147594	143578	48423	32469.5	54741.6	32785.5	24958.7	45489.7	97401.1	30563.4	0.00351997	3.8023	3.40136
7	Steroidal saponins	19610.5	34333.1	26126.3	24100.7	23403.5	27146.2	37772.2	36515.3	14722.2	11047.3	13651.2	12819.7	7450.03	14363.5	15295.5	9458.3	0.000115927	2.31771	1.31361
8	Steroidal saponins	270545	210672	152943	390319	200230	246926	234872	205044	33713.2	22031.7	35673.4	27017.2	17040.5	35030.3	34788.6	19763.5	5.82579e-05	8.49358	4.8061
9	Steroidal saponins	24301.3	8068.06	73443.4	30181.5	34261.9	40687.5	35582.8	32885.5	6871.82	5604.17	11426.4	6188.62	6013.68	6583.91	10343.6	6936.89	0.00389547	4.65927	1.56978
10	Steroidal saponins	139714	137249	176050	173969	121959	254123	168374	185516	58866.5	40378.8	55696.1	36098	53362.1	50808.8	97730.4	40341.3	2.82661e-05	3.1318	3.51205
11	Steroidal saponins	378679	276050	326442	94679.4	262902	241018	299871	256356	33815.9	27660.4	53655.8	48503.3	24551.9	49543.1	44914.8	26967.2	9.09732e-05	6.89894	4.92456
12	Steroidal saponins	20953.9	12273	18055.4	48841.6	15327.7	17633	14372	18848.7	25167.9	23165.8	35436.9	24740	15033.8	24007.9	26744.1	16720.9	0.523046	0.87063	0.271441
13	Steroidal saponins	2.6785e+06	3.05287e+06	3.25387e+06	4.1086e+06	3.05612e+06	3.78687e+06	3.26079e+06	2.74288e+06	2.90986e+06	2.2558e+06	2.78797e+06	2.91795e+06	1.88888e+06	3.28392e+06	3.32429e+06	2.20232e+06	0.0497164	1.20256	6.24561
14	Steroidal saponins	886427	862430	784750	1.34322e+06	801922	1.21919e+06	853391	1.01291e+06	189477	108200	180794	140423	111638	175473	207260	127753	7.03865e-06	6.25635	9.5899
15	Steroidal saponins	174220	215087	164528	257515	177484	301467	182530	228585	47755.6	33467.2	54290	37608.9	33168.4	44198.6	71943.1	34935.8	1.12129e-05	4.76097	4.32116
16	Steroidal saponins	350637	359188	365777	506544	308549	482665	417701	490840	338565	251056	318722	291586	207315	242661	349520	225741	0.00147017	1.4749	3.07837
17	Steroidal saponins	414779	334320	401591	561397	416472	423984	439152	394400	56614.4	29663	76696.2	36061.5	28529.6	71040.6	72993	45604	1.7682e-07	8.1162	6.55333
18	Steroidal saponins	2.55819e+06	2.29339e+06	2.58285e+06	3.01847e+06	2.48711e+06	2.43846e+06	2.4455e+06	2.27719e+06	535048	320083	498476	472766	376384	479514	566124	389678	2.80523e-09	5.52522	15.5473
19	Steroidal saponins	496377	631072	627785	755802	639447	769262	698729	653264	599624	521730	588635	576664	522555	620127	745654	528648	0.0988561	1.12078	2.11576
20	Steroidal saponins	103211	100977	96632.4	100708	84213.4	106645	111092	93445.6	42605.3	25849.4	41068.7	31210.4	25751.2	44729.3	55056.2	32483.2	3.99307e-09	2.6675	2.67939
21	Steroidal saponins	98754.2	157423	100511	91295.2	88666.8	245494	126080	113340	18601	12049.6	26740.5	12903	9097.65	19946.8	45529.9	15096.5	0.000555441	6.38617	3.31211
22	Steroidal saponins	620954	939480	832292	1.20539e+06	536465	1.1259e+06	916060	945726	572259	376467	577511	526316	340129	469132	581436	349283	0.000875611	1.87797	6.37781
23	Steroidal saponins	15114.4	14339.3	15425.6	17032.4	15671.2	16104.1	14739	12012.7	31243.9	27173.1	29923.5	29213.7	21579.3	30156.7	32325.6	22463.6	1.32981e-05	0.537483	1.06666
24	Steroidal saponins	8197.16	8888.91	8730.95	10576.8	8778.99	10388.6	9508.19	9290.27	10011.1	9347.88	11427.4	10876.7	9007.69	9664.46	11665.9	7984.68	0.212719	0.929663	0.225843
25	Steroidal saponins	46445.9	24500.4	47811.9	32843	29858.6	32230.3	41461.2	24524.8	11716.7	9160.88	11380.9	7765.56	5600.41	16473.9	11021.4	11839.5	7.16834e-05	3.29188	1.60683
26	Steroidal saponins	18961.9	20368.1	26169.7	27102.9	18807.7	37029.1	31306.9	26363.7	1278.44	984.496	731.666	821.111	530.018	1008.59	1359.67	781.938	1.09316e-05	27.4963	1.68013
27	Steroidal saponins	141824	92928.2	87748.1	102024	100425	96758	95087.5	85084.4	18714.8	18310.1	13852	20629.4	12888.6	23488.2	23619.3	14275.8	1.74788e-06	5.50068	3.05682
28	Steroidal saponins	187143	213630	208547	262685	196382	235529	205866	180228	31485.6	21989	17536.7	19130	16548.2	21828.4	28421.8	20466.6	9.94556e-08	9.52621	4.7113
29	Steroidal saponins	247987	302706	261542	331022	251456	290584	270379	207367	32800.9	19576.1	17992.2	18287.6	15277.1	21494.7	27896.5	19450.3	2.13148e-07	12.5194	5.40448
30	Steroidal saponins	147458	159390	151464	178595	124686	142704	139750	106619	16994.1	14386.7	10952.9	11706.5	7649.07	13521.6	16628.3	11000.8	4.05885e-07	11.1889	3.91807
31	Steroidal saponins	106008	493894	106955	128840	97752.3	499703	498487	84285.7	15283.5	10569.4	9513.23	10907.4	21889.3	11414.2	14200.9	9345.09	0.0127231	19.5488	4.45096
32	Steroidal saponins	98832.3	108977	153549	182390	121778	158679	145036	121267	7305.59	4976.81	4390.24	4484.58	3255.72	5635.17	6417.88	3579.52	3.32843e-06	27.2318	3.88623
33	Steroidal saponins	71854	41808.5	57103.8	49270.7	67592.1	49311.8	47458	55286.6	3863.86	6025.1	2914.26	5134.18	2459.2	7618.54	7531.81	2799.91	1.42734e-06	11.466	2.38308
34	Steroidal saponins	23882.3	24293.3	27064.6	25645.5	23699.2	24784.3	28148.9	23172.8	2958.46	2966.5	2502.31	2888.5	1689.65	2114.67	2167.55	1079.62	6.73157e-11	10.9266	1.64094
35	Steroidal saponins	29462	27394.2	31580.8	29614	47268.4	29077	27273.7	26241.5	3816.85	2941.67	3861.34	4207.28	3301.61	4060.36	4500.16	3213.44	8.55556e-06	8.29061	1.74716
36	Steroidal saponins	64286.6	98336.3	104521	94794.5	57292.2	63283.9	59320.3	50044.5	1286.7	1546.2	1246.15	1593.15	788.298	1431.2	1026.69	836.063	2.84011e-05	60.6779	2.86046
37	Steroidal saponins	51677.6	75240.9	77085.5	80723.5	56731.3	74088.6	62610.6	56176.6	2718.64	2414.66	1966.61	1997.57	2147.26	2217.93	4236.22	1561.09	7.63561e-07	27.7433	2.73913
38	Steroidal saponins	154489	174990	134845	253094	137433	128895	104628	114410	4957.13	4948.11	2611.82	4233.72	3946.76	3638.34	4100.97	1896.05	4.81018e-05	39.6528	4.04384
39	Steroidal saponins	88004.9	182652	107305	182485	118883	161751	120980	115726	4885.88	4198.34	4434.98	3333.74	2292.87	2951.72	10018.3	2100.81	1.7105e-05	31.4989	3.82909
40	Steroidal saponins	279011	226827	275925	332892	271307	326828	280365	297797	9828.14	9465.9	6572.5	6844.09	7606.55	7256.15	19063.4	7595.25	4.93223e-08	30.8621	5.69575
41	Steroidal saponins	632320	652936	389700	818432	533664	412467	353454	451728	42137.1	32611.1	25702.1	54039.5	32581.7	49178	23860.7	29489.9	4.99094e-05	14.6571	7.39541
42	Steroidal saponins	196363	219772	146853	298809	169824	164102	118844	127121	5474.15	5558.88	4508.28	6305.42	4522.91	5525.31	4925.37	5202.92	6.36691e-05	34.3069	4.41087
43	Steroidal saponins	1.10595e+06	1.21193e+06	927971	1.64767e+06	986966	960487	680839	814498	24707.1	22923.8	13399.7	19597.8	15448.5	23729.9	17395.6	19099.3	2.37468e-05	53.3348	10.7451
44	Steroidal saponins	20039	19169	11869.5	22600.8	14842.3	12654.4	9312.25	4063.59	633.61	451.649	941.7	548.258	0	1039.37	203.472	0	0.000368691	30.0024	1.21868
45	Steroidal saponins	47521.6	27398.5	51649.9	81052.3	65586.5	67411.3	44082.4	72822	8424.66	6708.06	6080.57	8613.88	4788.75	8124.38	6021.43	6395.16	8.20377e-05	8.29497	2.31562
46	Steroidal saponins	22243.4	18834.7	17426.1	20184.3	19275.4	15749.9	12117.6	14538	5028.81	5473.25	5150.37	5347.03	2224.18	3917.28	5524.26	5646.43	3.32964e-06	3.66389	1.19675
47	Steroidal saponins	126533	103443	94288.3	116791	97120.5	81595.4	87336.8	81439.1	8423.33	6513.33	6054.3	7600.26	5658.9	8143.55	4595.4	5576.99	8.31904e-07	15.0011	3.269
48	Steroidal saponins	28270.1	29485	24752.3	46703.5	26348.5	35297.7	22331.4	29015.5	1220.21	1250.02	1086.03	1268.2	727.168	1449.6	2110.59	993.738	1.31201e-05	23.9674	1.8093
49	Steroidal saponins	842524	626780	617826	684687	616281	564818	559483	571249	14063.4	11278	8007.43	11413.5	12295	13649.9	9093.72	10280.4	2.83664e-07	56.434	8.52991
50	Steroidal saponins	32953.6	32067	31437.9	30965.9	31637.3	23072.3	20817.7	17658.1	10231.7	11530.5	8905.39	12435.4	7645.55	11043.8	8013.89	7538.79	3.42552e-05	2.85228	1.40027
51	Steroidal saponins	146316	181805	158711	245830	229922	216384	143464	156786	26278.5	26316.3	22238.3	26509.5	14975.1	23977.1	17975.6	20790.4	7.97764e-06	8.26099	4.28905
52	Steroidal saponins	14983.2	11469.2	26837.9	27100.2	15268.1	18021.9	16825.8	13943.9	2854.33	2382.46	2022.77	3255.51	1471.4	2310.32	1547.39	1978.44	0.000109537	8.10488	1.30831
53	Steroidal saponins	11466	33135.1	39540.1	26579.9	46426.5	55157.3	14413.4	11005.7	7168	1897.9	1553.92	1988.44	1506.85	1783.3	1185.84	1486.25	0.00232364	12.8012	1.60528
54	Flavonoids	342.03	251.518	285.012	430.167	226.797	371.024	282.35	210.833	65680.5	78462.7	76314.5	81116.4	46701.6	76363.4	64140.5	50823.1	1.70029e-06	0.00444722	2.79341
55	Flavonoids	898.243	940.941	805.471	755.085	746.025	973.346	777.629	665.898	37450	42347.5	40497.2	44429.7	26191.8	41107.5	30236.4	28282.5	1.99377e-06	0.0225875	2.0278
56	Flavonoids	1018.78	1228.53	1102.96	1037.45	808.382	931.29	962.156	753.451	110841	28596.5	165710	355393	57667.4	120757	122451	145430	0.00554157	0.00708591	3.56872
57	Flavonoids	3026.18	2420.35	3177.09	2828.58	2766.66	2785.16	2922.27	2228.84	28563.2	5035.62	78268.5	180503	46812	157071	44404.2	40176.7	0.0165432	0.0381437	2.36383
58	Flavonoids	1026.79	998.07	1280.65	1117.06	856.95	998.967	1100.79	996.15	19747.9	17044.8	25631.3	26187	28692.9	26543.6	23295.2	22628.5	6.83955e-07	0.0441344	1.64691
59	Flavonoids	521.816	234.292	238.228	275.528	363.673	156.843	91.2431	180.097	4090.68	4807.08	4617.53	5552.07	3064.13	4249.5	4182.42	3514.99	1.00163e-06	0.0604993	0.680791
60	Flavonoids	353.414	410.233	285.12	439.85	384.652	496.95	382.154	286.574	8375.86	9229.15	9815.02	12163.6	6785.79	10686.1	8413.67	6512.22	4.04604e-06	0.0422185	0.996251
61	Flavonoids	399.513	594.113	327.002	351.148	460.448	689.065	374.694	324.429	5170.14	3771.09	16886.4	11042.5	11514.9	10273	8955.02	10854.6	0.000316696	0.0448645	0.980978
62	Flavonoids	186.933	269.146	258.149	265.805	92.4763	207.659	247.046	153.584	4689.12	4483.58	4295.63	4886.12	2620.33	4227.84	3924.11	3225.72	1.92076e-06	0.0519527	0.667496
63	Flavonoids	1252.55	1780.76	1345.79	1476.04	1322.33	1487.08	1175.58	924.766	13632.3	12788.7	16909.5	17801.7	7914.79	14140.9	9608.94	9692.9	3.68404e-05	0.105034	1.02462
64	Flavonoids	1034.66	1172.56	1114.93	994.254	1137.21	1503.53	817.569	849.144	3337.75	3108	3047.84	3044.38	1798.94	3111.84	2887.98	1821.8	4.53598e-05	0.389188	0.43057
65	Flavonoids	398.661	382.302	310.089	369.347	305.627	486.042	300.396	223.888	25169.9	27320.5	27388.9	31025.5	18332.6	28438.2	23464.1	18691.6	1.24252e-06	0.0138935	1.69292
66	Flavonoids	873.399	961.591	889.141	839.425	929.987	947.826	881.95	749.882	8440.09	8239.71	9181.32	10096.5	5201.25	8167.96	7903	5598.07	6.94613e-06	0.112581	0.902528
67	Flavonoids	933.539	1028.23	805.732	1207.37	976.306	828.909	818.833	897.859	26907.8	28471.5	23216.4	23505.2	16656.8	23279.2	20658.7	18361.5	1.17517e-06	0.0414056	1.58454
68	Flavonoids	296.976	329.041	262.716	435.626	366.417	293.317	215.682	304.535	137386	139839	136060	161489	98625.9	144821	115345	104535	5.96924e-07	0.0024124	3.88659
69	Flavonoids	99.5676	223.413	322.017	179.324	123.894	72.5476	74.7444	116.762	3403.21	4886.5	3867.34	3677.01	3885.28	3329.26	3591.77	2518.76	1.14513e-06	0.0415743	0.632942
70	Flavonoids	1392.74	1693.11	1646.2	1297.49	1234.03	1507.95	1644.91	1288.18	340793	378309	396334	488596	292614	406798	334203	298161	9.22355e-07	0.00398684	6.60555
71	Flavonoids	695.161	703.082	755.034	990.694	783.332	740.622	668.525	482.886	1167.89	2228.44	1561.6	2302.18	784.527	1448.24	1356.96	1418.99	0.0025372	0.474319	0.273579
72	Flavonoids	9554.43	13919.3	11303.6	13860.3	10398.9	9047.06	10188.9	11242.2	2.34438e+06	2.8973e+06	2.39512e+06	2.56558e+06	2.12593e+06	3.00065e+06	2.46345e+06	2.0863e+06	1.28451e-07	0.00450305	17.0151
73	Flavonoids	597.337	567.235	440.642	755.679	575.098	324.204	649.196	579.732	12148.2	18507.3	13299.2	19441.8	15739.2	22227.6	15201.7	10764.8	1.05567e-05	0.0352559	1.31934
74	Flavonoids	180.282	620.973	233.2	451.908	235.669	454.464	189.381	180.38	2935.91	3272.21	3723.55	4122	2168.64	4996.77	2560.11	3091.57	2.1549e-05	0.0947594	0.582321
75	Flavonoids	301.455	285.637	420.354	373.781	279.857	236.143	501.728	231.294	1780.27	2820.53	1370.42	3818.66	1479.55	3416.7	1697.64	1481.32	0.000842195	0.147229	0.435994
76	Flavonoids	1223.4	1299.38	1272.61	1258.44	1438.02	1071.69	881.522	1087.15	63660.4	68853.6	64456.9	72509.8	60123.5	95982.1	66337	47521.3	2.64956e-06	0.0176704	2.79879
77	Flavonoids	1084.34	2987.51	1036.45	623.119	728.028	757.239	984.366	771.763	1.40405e+06	1.49374e+06	1.29092e+06	1.28284e+06	1.32825e+06	1.36431e+06	1.29773e+06	1.00619e+06	3.01663e-08	0.000857163	12.5974
78	Flavonoids	1727.84	2839.42	1459.53	1381.9	1429.5	1225.2	1658.73	1124.65	778763	808593	789439	761434	675452	857735	764487	614957	1.99164e-08	0.00212313	9.57691
79	Flavonoids	2466.01	2075.83	1867.77	2185.04	2023.23	2323.53	2011.58	1422.51	129722	142220	139889	162067	101371	144078	106343	104902	8.63755e-07	0.0158894	3.83887
80	Flavonoids	1241.71	1237.54	1011.22	958.324	812.872	993.111	1076.44	822.055	34987.9	39772.2	36586.7	41018.1	28734.7	38015.1	31739.1	29345.9	1.55172e-07	0.0290981	1.99499
81	Flavonoids	6291.13	6449.76	6080.83	6512.87	4853.93	5237.4	5723.77	5073.22	18154.1	20919.6	13787.2	14255.1	12852.4	13430.2	16068.1	14034.8	1.49483e-05	0.37427	1.04995
82	Flavonoids	3858.88	4585.29	3276.92	4844.25	3850.76	2928.32	3374.8	3070.41	32637.6	34424.3	26585.2	29971.3	22369.4	31057.4	25606.9	23339.5	6.99518e-07	0.131817	1.50155
83	Flavonoids	1357.66	504.084	403.877	315.102	552.472	457.906	404.408	395.129	26725.1	30124.7	25327.9	28715	21293.4	26146.4	21501.7	22569.4	1.03173e-07	0.0216925	1.7004
84	Flavonoids	881.497	769.448	723.507	511.221	706.886	511.143	572.585	383.191	38271.4	41654.8	42279.8	42972.6	30968.3	40354.2	36806	30745.9	1.07423e-07	0.0166401	2.09403
85	Flavonoids	795.722	607.421	643.418	587.679	457.737	509.315	438.19	532.039	38724.7	41316.3	43048.8	43884.3	32720.4	39343.8	35510.5	34454	2.86444e-08	0.0147944	2.14931
86	Flavonoids	955.256	1291.68	887.362	1356.6	872.945	1253.23	781.38	643.394	2518.36	4323.11	2101.74	2395.35	1591.92	2355.78	2792.21	2051.69	0.000890258	0.399492	0.38521
87	Flavonoids	1348.45	835.434	1454.34	1275.22	1453.86	925.38	857.678	975.683	1651.76	1920.8	2049.72	2328.63	1464.67	1988.65	1943.14	1753.72	6.42576e-05	0.604331	0.272974
88	Flavonoids	1223.4	1299.38	1272.61	1258.44	1438.02	1071.69	881.522	1087.15	63660.4	68853.6	64456.9	72509.8	60123.5	95982.1	66337	47521.3	2.64956e-06	0.0176704	2.76225
89	Flavonoids	2466.01	2075.83	1867.77	2185.04	2023.23	2323.53	2011.58	1422.51	129722	142220	139889	162067	101371	144078	106343	104902	8.63755e-07	0.0158894	3.89116
90	Flavonoids	228.47	284.215	74.431	158.027	145.286	312.798	256.574	188.234	35825	44644.2	42062.8	40880.6	31877.8	40260.6	35996.6	33326.1	5.83838e-08	0.00540563	2.1083
91	Flavonoids	549.374	165.785	807.312	386.402	720.001	395.228	576.162	461.697	135679	127285	130939	194258	87767.4	123587	90206.7	98905.2	1.92438e-05	0.00410869	3.72831
92	Flavonoids	1419.94	1429.48	2186.81	1337.27	1299.8	1598.9	1537.9	1297.67	94657	106803	97376.9	114352	74659.8	106774	81243.2	69434.3	9.87192e-07	0.0162455	3.30672
93	Flavonoids	2603.08	2750.84	2875.12	1825.95	1784.67	1481.87	1882.9	1645.39	327070	369822	365154	382153	262618	336102	291301	233534	6.58398e-07	0.00656209	6.17717
94	Flavonoids	100.1	57.1432	24.8076	154.881	276.248	72.6552	68.6449	75.4603	1726.44	1751.29	896.696	3556.12	1295.3	1209.71	796.274	529.493	0.00460043	0.0705652	0.348225
95	Flavonoids	1773.19	1461.79	1100.89	2086.2	1424.75	1769.88	1676.64	1186.27	9995.52	8845.57	8892.66	12539.2	5454.77	7921.63	6810.38	6839.29	4.10655e-05	0.185435	0.878548
96	Flavonoids	335.284	474.826	330.116	337.243	366.459	497.157	415.132	233.181	5724.07	6782.06	2926.54	7997.62	2892.55	4175.87	2655.51	3396.4	0.000618407	0.0817879	0.651611
97	Flavonoids	286.107	307.326	305.502	468.993	229.439	405.144	419.517	313.383	16432.9	19444.6	8759.8	22598.6	6717.59	10708.8	6398.37	8537.97	0.00088493	0.0274644	1.10244
98	Flavonoids	967.176	1013.43	724.067	855.583	463.429	387.138	915.683	189.997	4405.65	5129.33	3210.79	4041.77	2349.3	1442.65	2082.99	2715.48	0.000696519	0.217374	0.489718
99	Flavonoids	346.999	682.982	511.012	803.823	414.433	680.532	317.707	346.092	2219.45	2479.8	1174.86	2862.01	1160.66	1576.67	1596.88	1592.76	0.00037387	0.279858	0.362755
100	Flavonoids	3932.69	3468.92	4256.89	3133.71	3624.75	3953.52	3164.46	3901.5	4868.01	5044.05	4473.19	8041.43	4055.55	4941.99	5539.66	5555.5	0.00602398	0.692306	0.3736
101	Phenolic acids	300954	351467	244173	234045	266611	315709	249115	224361	254250	267397	216442	223358	190332	221723	218687	197370	0.0201027	1.22177	1.68786
102	Phenolic acids	126606	142813	126782	123610	124533	124275	136440	112529	335596	357304	353644	341594	352442	322069	356020	375372	1.55806e-12	0.3642	4.55675
103	Phenolic acids	5636.86	7399.92	5046.22	9663.17	2666.6	15144.8	6076.7	13565.6	17786.9	16751.6	24472.3	11606.7	22036.2	16057.8	23337	22813.3	0.00016897	0.42102	0.925823
104	Phenolic acids	17250.2	31802.4	33177.5	16938.6	20262.7	30223.4	16867.9	26070.6	8269.37	10293.8	9571.96	10529.3	7708.52	8437.02	8264.37	6534.05	0.000390466	2.76681	1.10733
105	Phenolic acids	3414.3	3794.36	4687.09	3477.52	2965.12	3947.93	2191.7	3390.42	218.696	53.1399	166.4	112.064	178.288	245.856	256.985	276.358	3.56452e-06	18.483	0.548097
106	Phenolic acids	1125.25	342.111	841.688	1593.55	1090.38	1123.78	1426.66	1120.85	8135.86	6876.75	9115.94	7966.43	8882.74	7316.92	9083.99	8690.75	1.20145e-09	0.131139	0.913721
107	Phenolic acids	2044.35	2317	1525.36	2100.68	1772.68	1752.41	1858.83	1566.02	18298.7	580.427	3991.68	4316.77	4434.2	4931.2	4561.79	3570.98	0.0884149	0.334275	0.45959
108	Phenolic acids	2016.31	1828.56	1869.02	2116.13	2179.95	2060.97	1722.7	1530.36	50762.9	60952.7	57995.1	64925.4	40897.7	59576.7	45913.2	45488.8	6.70105e-07	0.0359286	2.18611
109	Phenolic acids	2177.78	2335.13	1602.41	7291.95	3255.33	1804.72	1575	1010.77	1.00726e+06	1.16841e+06	1.68988e+06	1.82066e+06	899791	1.44716e+06	1.16883e+06	849839	2.40761e-05	0.00209445	10.741
110	Phenolic acids	22092.9	25781.7	32159.7	17361.8	18704.8	27114	19288.4	24130.2	3799.47	3494.57	2454.07	1464.84	3033.62	4204.48	3795.39	3874.22	6.17868e-06	7.14505	1.50174
111	Phenolic acids	132442	136000	120342	137357	119552	122995	109538	116101	8117.14	8842.62	6040.25	6626.45	5401.93	6358.76	7348.94	6517.11	4.15814e-09	17.9958	3.32121
112	Phenolic acids	818.12	973.938	809.041	877.308	853.29	926.184	594.956	849.164	21220	22766.5	30124.3	34179.4	22606.1	26446.6	22140.6	21662.6	1.73334e-06	0.0333191	1.67433
113	Phenolic acids	1332.41	1049.97	1128.48	1190.28	1870.37	1591	1503.78	914.492	5718.33	5931.8	6147.15	6365.99	4560.38	6435.84	5063.39	4549.39	1.10726e-07	0.236325	0.703003
114	Phenolic acids	4263.43	5263.49	2229.42	3567.12	5159.57	4647.52	4077.17	10094.6	78563.8	66202.9	91765.3	91472.6	62036.2	91867.4	83539.7	69630.6	2.98199e-07	0.0618858	2.6416
115	Phenolic acids	1556.78	895.884	973.958	1513.94	1377.5	1496.89	1299.21	1027.75	29359.3	28076.7	35724	37878.3	22796.4	29679.2	31486.5	26520.4	6.03677e-07	0.0419919	1.64145
116	Phenolic acids	2615.87	2899.09	2336.75	7534.78	3175.33	1743.26	2094.43	1571.92	154676	193654	134064	159012	82890.6	132257	104305	94153.5	2.3607e-05	0.0227215	3.38629
117	Phenolic acids	1513.88	1325.96	1190.28	1067.67	1204.52	1163.16	1322.23	1044.02	117295	140886	128282	131749	100857	134144	118979	105079	5.2838e-08	0.0100604	3.7681
118	Phenolic acids	11161.1	9836.49	8392.33	7124.81	8525.36	8298.98	5035.07	11146	12905.7	15451.2	9330.81	11347.2	3988.32	8446.2	7354.56	6855.9	0.613743	0.918608	0.119141
119	Phenolic acids	61752.4	31960.3	51656.6	55498.2	58244.8	42019.5	49207.6	50606.6	39424.7	37740.7	42397.3	44250.1	39804.4	43032.9	40953.9	40666.5	0.0304775	1.22139	0.724562
120	Phenolic acids	17251.5	17715.6	14995.4	24347.1	18477.4	20984.1	24178	12342.9	298199	205807	424776	464160	272302	402237	333456	259294	2.32746e-05	0.0564958	5.37718
121	Phenolic acids	1083.66	817.8	944.938	1402.22	1283.25	1443.09	1916.9	1045.12	16108.1	12769.9	17902.7	20207.6	18519.1	20706.6	19513	16695	2.87562e-07	0.0697713	1.38809
122	Phenolic acids	1046.16	1273.03	896.356	1773.7	1423.76	845.132	941.924	1010.28	14504	9621.25	10865.3	11818.4	8064.78	11895.7	9623.47	7637.79	5.79813e-06	0.109607	0.922794
123	Phenolic acids	1828.22	1369.16	1534.91	1844.92	2100.99	1456.56	2168.14	1177.4	2168.81	2820.68	1231.14	2667.35	1329.82	3003.74	2262.87	2008.34	0.0833096	0.770622	0.149038
124	Phenolic acids	908.415	772.664	874.047	934.122	883.175	766.54	775.224	642.898	21220.6	27826.8	21166.3	35296.6	15925.2	20579.3	27058.5	16854.5	2.37298e-05	0.0352668	1.4156
125	Phenolic acids	1413.59	1260.01	1386.88	1243.76	1305.63	1049.16	1163.4	1036.82	23763.2	31145.1	21816.5	22475.2	18112.8	22804.4	19770.6	18425.5	1.82867e-06	0.0552917	1.55402
126	Phenolic acids	10127.9	6828.64	4699.41	9944.64	10003.7	9158.6	9128.63	10052.9	43417.3	41746.6	39683.2	41232.4	28540.9	15958.5	37456.7	39227	5.10804e-05	0.243486	1.71303
127	Phenolic acids	339192	297014	217715	296478	284977	259257	240598	240293	235339	235580	254771	263755	196255	253791	232696	216489	0.047242	1.15188	1.35301
128	Phenolic acids	3260.15	2604.1	3248.6	4053.21	2732.47	2433.46	2198.54	2448.06	25237.9	24463	17509.6	20772.8	5104.19	17361	17429.5	17861.9	0.000198717	0.157668	1.13222
129	Phenolic acids	4539.87	4099.35	5026.13	2737.37	4383.67	2542.5	3468.53	2962.2	6331.89	5558.28	7224.22	7139.93	5267.28	6452	5365.99	5884.72	5.7436e-05	0.604572	0.443456
130	Phenolic acids	63732.1	57957	32777.3	61992.3	48334.1	39295.8	23068.7	40709.7	56069.2	49089.6	52379.1	66865.4	41925.4	47885.6	41148.6	40953.8	0.5678	0.928215	0.272744
131	Phenolic acids	64527.6	50382.5	35053.3	73492.2	54134.3	35341.6	34972.4	49524.3	117610	108925	114788	129006	114986	129222	116413	105270	1.41966e-07	0.424503	2.7651
132	Phenolic acids	55491.6	48272.4	45452.7	62685	60020.1	36590.5	31063.6	46989.7	97260.1	112524	103274	122103	102526	136058	99340.5	88010.4	8.32397e-07	0.448923	2.56455
133	Phenolic acids	13025.5	12557.6	12677.4	14240.6	13084.9	6220.93	4039.59	9292.86	989.668	825.809	376.314	1862.76	864.413	995.426	3000.12	1361.68	0.000147132	8.28511	0.891912
134	Oxylipins	53043.2	36686.2	50568.7	49612.6	45196.5	46183.1	43345.2	45257	65587.8	175065	62254.8	80567.2	90938.2	66147.1	126767	47359.4	0.0231836	0.517559	1.78623
135	Oxylipins	553015	490587	426740	423840	595141	455526	370380	458809	757533	801724	525533	567818	352165	554577	546537	471086	0.111383	0.824571	2.01929
136	Oxylipins	198169	190164	202485	471740	540401	185931	188817	165080	81875	80473.3	49641.8	48822.3	26022.2	31854	34389.2	37953.1	0.00405413	5.47984	3.93105
137	Oxylipins	159947	209179	169108	149429	154501	161000	135869	149761	61018.3	58710.1	57885	58102.1	40482.9	52705.1	56564.7	44427.5	5.27321e-07	2.99792	3.12476
138	Oxylipins	31391.8	32881.3	30875.1	25766.6	4168.91	34585.4	23454.9	23590.3	11725.4	12568.9	7904.32	7929.42	5253.9	7719.07	8241.73	7488.04	0.0013207	3.00323	1.14206
139	Oxylipins	21560.1	21446.7	24446.7	18854	22238.9	22779.7	18040	16668.9	2618.07	4166.64	3675.24	3960.64	2835.95	2287.66	2619.12	2462.65	7.38284e-08	6.74227	1.28065
140	Oxylipins	32185	18775.5	36747.3	16102.8	19532.6	20024.8	15783.2	25701.8	7503.36	8690.91	8051.21	8578.75	6013.42	9686.45	9570.83	7657.83	0.00088411	2.81133	1.08039
141	Oxylipins	19557.6	14461	8461.41	16304.8	23061.5	18859.1	22817.3	16676.5	2670.25	5488.35	5699.46	6885.11	4226.56	5032.79	5161.28	2407.54	6.66222e-05	3.73155	1.16083
142	Oxylipins	3.09603e+06	4.69044e+06	3.14419e+06	2.827e+06	2.94198e+06	2.97618e+06	2.58632e+06	2.46888e+06	366390	445601	261568	230501	159641	242926	281810	103194	5.82426e-06	11.8238	15.9909
143	Oxylipins	53043.2	36686.2	50568.7	49612.6	45196.5	46183.1	43345.2	45257	65587.8	175065	62254.8	80567.2	90938.2	66147.1	126767	47359.4	0.0231836	0.517559	1.78623
144	Oxylipins	48687.1	53965.3	53313.6	47255.2	49494.4	44930.5	48662.4	37312	6984.71	8292.13	5709.31	5590.8	4453.72	5798.8	5240.84	4998.44	2.6886e-08	8.15022	1.98318
145	Oxylipins	724442	715146	815969	671756	957798	696604	886612	615404	235554	383959	218679	253983	142865	217707	240011	172634	1.79556e-07	3.26137	6.83558
146	Oxylipins	14438.3	17387.9	13766.6	15198.3	17265.9	16048.9	12563.8	14700.1	4540.77	13528.3	7274.92	4351.91	1904.3	7337.66	10420.4	6883.51	0.000205365	2.158	0.801605
147	Oxylipins	60133.6	56512.2	65987.3	57642.7	60728.5	57574	49185.1	48686.4	5362	4600.54	2791.25	4267.53	4117.76	3590.82	3832.72	3707.04	2.2645e-08	14.1449	2.23045
148	Oxylipins	15947.6	20349.3	16861	13791.7	22876.3	17266.7	14624.4	15778.2	8209.25	9881.69	4791.38	4028.22	3840	5178.93	7036.28	4806.75	1.32269e-06	2.87812	1.10083
149	Oxylipins	14146.7	12456.7	11919.6	13565.6	10645.4	12475	11406.2	10119.6	14497.9	15877.5	10818.5	9190.75	9161.08	12086.7	13644.1	10981.4	0.953336	1.00495	0.142765
150	Oxylipins	38495.7	41047.7	39955	35181.5	41220.4	32213.9	35156.7	32666.4	11209.5	13758.4	9480.52	9528.2	5580.34	9746.67	8564.55	9296.91	6.42401e-10	3.83512	1.78129
151	Oxylipins	5514.58	5921.73	6365.67	16461.2	6548.59	5610.3	10183.4	8965.83	2849.13	5620.09	3700.41	3307.18	2534.46	4083.76	2534.24	1630.48	0.00703412	2.49703	0.562181
152	Oxylipins	8224.67	8696.32	8063.1	8905.54	6627.84	8069.18	5864.58	6534.7	13850.6	16590	11692.6	11769.1	8774.46	13713.3	13892.8	11571.8	0.000211861	0.598754	0.634602
153	Oxylipins	9135.74	4342.63	7501.19	4726.1	5738.27	6461.89	5426.07	4194.54	4630.52	5740.09	3543.41	2984.07	1887.46	3380.09	2974.38	2874.13	0.00575992	1.69651	0.395794
154	Oxylipins	14813.7	17943	13445.5	12829.8	16457	12552.6	13929.2	9596.84	2259.17	2314.98	1911.38	1652.33	1802.68	1612.71	2233.68	1358.98	2.35545e-06	7.36619	1.0503
155	Oxylipins	4980.44	6569.22	22205.8	5687.39	6275.17	6275.99	5750.99	5684.87	4935.89	5310.09	3760.68	3685.37	3578.82	3056.44	3698.27	3170.63	0.090672	2.03326	0.428829
156	Oxylipins	57258.8	43935.7	60419.1	33330.6	49026	48450.8	54635.5	38321.3	5923.35	7635.87	6301.77	6127.81	4551.85	6229.97	6161.26	4998.24	3.67173e-06	8.04041	1.95624
157	Oxylipins	796076	432149	468122	702087	744848	651770	368117	543523	176893	235882	85426.6	78917.2	66041.7	93772.2	109004	89258.8	2.53347e-05	5.03284	6.36464
158	Oxylipins	8349.51	9514.6	8715.94	8411.9	9104.5	7721.54	6418.03	7884.39	9656.72	12535.6	7204.29	9200	6062.51	8671.71	7830.99	7712.05	0.663727	0.960022	0.0894435
159	Oxylipins	32502.4	41140.9	33976.4	30347.3	27963.9	24862.4	25868	21413.3	2572.15	3004.78	1917.93	2521.23	2307.35	2341.59	2418.64	1724.91	4.46927e-06	12.6578	1.58479
160	Oxylipins	1.37586e+06	1.12335e+06	802676	1.21915e+06	1.48844e+06	1.22812e+06	707315	1.046e+06	751379	1.11886e+06	526102	558459	338813	568941	576142	501798	0.00123961	1.81984	5.97893
161	Oxylipins	96243.4	117686	96207.4	102500	107769	100427	63518	86098.2	89888.3	138247	74751.7	57465.5	52219.5	68333.4	72900.9	74503.6	0.134476	1.22622	0.931199
162	Oxylipins	219177	194730	225390	176767	245029	209051	167846	184304	269999	226348	114736	106773	76718	117043	117211	112907	0.043307	1.4209	2.0119
163	Oxylipins	94444	111876	112530	62850.7	104415	70725.3	94284.6	48971.8	8842.1	8688.85	5503.3	8105.65	4084.25	6192.59	5124.91	5376.59	2.61627e-05	13.4846	2.68398
164	Oxylipins	14619.6	14719	18900.7	12935.5	13822.6	13896.2	12960.3	11648.5	2742.16	2601.23	3547.93	3247.5	2972.46	3289.71	2034.64	3025.56	7.69609e-07	4.83788	1.0188
165	Oxylipins	67285.5	75002.2	61349.6	58920	58604	69911.6	51366.8	51156.5	14825.3	15123.6	14130.1	16526.4	11177.4	16331.5	25365.8	14750.5	8.06207e-08	3.84929	2.04368
166	Oxylipins	9443.42	10203.8	7583.37	7729.03	7218.39	9232.41	5964.17	6500.19	124280	129562	118983	123151	86234.4	108442	108703	90631.8	3.01122e-07	0.0717705	3.09503
167	Oxylipins	8363.51	7774.27	7439.56	5971.56	6368.41	5529.73	5220.74	4703.25	10013.2	12566.1	7929.32	9738.71	5161.53	7334.96	7437.89	5915.86	0.0844129	0.7772	0.279761
168	Oxylipins	17609.2	13607	13846.3	14458.3	13474.6	16101	16392.2	14304.1	20647.5	21566.5	27266.1	21784.2	22022	21366	22975.3	19276.8	1.04378e-05	0.67716	0.778926
169	Oxylipins	190726	179649	271063	188739	214049	148350	170115	141851	5724.47	7793.09	5253.29	4637.22	3684.53	4946.41	4821.36	3359.68	4.33578e-06	37.4077	4.08998
170	Oxylipins	340168	356911	378141	304920	301766	276656	223815	244296	208998	285743	163611	97306	76763.5	103003	42880.9	93449.1	0.000313243	2.26421	3.6079
171	Oxylipins	152435	132531	110129	111659	79289.5	110877	59495.9	90541.7	24275.7	25426.5	18906	15376.7	18255.5	21260	19477.9	19218.2	6.87013e-05	5.22181	2.74047
172	Oxylipins	11042.9	13769.8	9403.68	8370.27	7673.17	8742.1	9912.59	6434	5397.24	4990.16	3016.09	6356.59	2876	3895.89	3557.34	2806.01	0.000113124	2.29056	0.651319
173	Oxylipins	502841	540654	469300	409345	418412	385695	370948	333955	178722	2.5824e+06	145665	157536	101341	132616	1.46618e+06	111953	0.597947	0.703622	4.35913
174	Oxylipins	7898.76	7752.98	10070.6	8088.53	3385.2	6368.99	4986	4162.63	13204.1	13727	5816.58	7018.53	4337.78	4931.19	5356.78	3016.3	0.727607	0.918224	0.0901168
175	Oxylipins	237121	192407	224520	236739	217686	173272	132484	175402	248920	330337	202299	207731	166472	166150	196204	60427.1	0.964159	1.00703	0.236134
176	Oxylipins	1631.79	10717.8	1805.06	1341.85	1776.3	5731.14	1365.12	727.361	50978	55279.4	48165.1	44924.6	9723.45	51467.9	65239	29663.3	0.000208982	0.0706064	1.85899
177	Oxylipins	1929.12	1912.95	577.625	374.225	1275.68	447.338	436.461	294.289	16768.5	14683.2	10137.6	19659.2	8781.18	16269.2	10512.7	10457.6	3.41073e-05	0.0675654	1.04927
178	Oxylipins	152931	144916	149293	139821	147250	129819	127954	113665	229592	260829	189928	212146	172771	236233	233164	192580	5.11474e-05	0.640123	2.83682
179	Oxylipins	19027.8	15655.4	14523.1	21228.1	16972.6	9379.74	9360.4	12960	3350.83	2419.35	1431.24	2837.53	1318.95	1765.92	1291.98	1377.88	4.42494e-05	7.54145	1.06396
180	Oxylipins	2363.97	1980.37	1283.71	1844.83	1465.53	765.292	1123.89	937.063	726.059	708.435	563.24	585.69	368.18	325.133	288.144	274.379	0.00110304	3.0643	0.276712
181	Oxylipins	2265.28	3244.8	2152.32	3521.02	2172.39	1035.25	531.813	1559.58	150.935	113.304	39.5635	163.902	235.808	240.481	197.526	205.399	0.00115224	12.2371	0.388588
182	Glycerophospholipids	86073.7	85841.5	80133.5	64388.1	79695.2	73812	75776	56007.8	12162.2	10658.3	5674.56	9661.67	7729.13	9761.8	9291.99	6923.65	2.077e-07	8.37323	2.77831
183	Glycerophospholipids	78385.4	76014.2	61951.4	69976.8	63574.4	40697	41658.8	34895.3	4511.36	6243.48	5658.65	8146.93	6320.71	6263.16	6963.56	4926.04	5.18539e-05	9.52715	2.41569
184	Glycerophospholipids	108250	104075	105060	82791.9	98012.3	76483.2	111708	68460	8865.5	5496.73	8778.48	8828.78	6610.23	5884.29	9469.6	7706.4	1.16602e-06	12.2459	2.82556
185	Glycerophospholipids	157083	149956	138946	139669	145853	125471	127671	75184.9	10133.8	5437.03	12994.6	12811.7	9275.12	15186.6	6558.95	4870.14	1.96376e-06	13.7163	3.36282
186	LysoGPLs	17811.1	14788.7	10266.8	10049.4	14906.9	20967.7	12183.8	13023.4	3281.07	5204.01	1843.79	2130.54	2345.32	2015.76	3346.41	2478.05	2.89157e-05	5.03414	0.989668
187	LysoGPLs	225810	235249	182899	197204	204109	169045	178359	157071	32522.9	44638.6	26691.3	27133.3	16434.6	25679.2	26825.1	21119.7	1.21617e-07	7.01101	3.92242
188	LysoGPLs	16389.7	17859.7	12843.5	15603.4	15143.1	10441.2	11930	12678.3	9004.65	10349.1	7229.15	5808.13	5110.05	9308.97	9143.72	5690.3	7.44145e-05	1.8313	0.714239
189	LysoGPLs	18110.7	18559.8	16805	15675.1	20125.5	15666.2	23303.1	9553.64	1574.48	1207.91	1944	2104.41	1218.5	1806.04	879.704	1499.27	9.43314e-06	11.2633	1.18695
190	LysoGPLs	9942.98	10690.3	8352.72	9821.26	10253.2	10822.2	7551.63	6393.43	14711.1	9704.57	16570.2	16213.6	12138.7	13068.2	14781.8	13027.5	0.000510981	0.669847	0.584399
191	LysoGPLs	157909	59898.5	60400.4	54152.3	17534	53601.5	43018.3	45273.8	186579	234682	126902	150039	1.34364e+06	176635	260912	226262	0.0975824	0.181763	4.2463
192	LysoGPLs	31373.7	27285	50899.5	16558	31905.9	30424.9	16081.4	13461	28458.5	68705.8	67673.4	87369.6	200826	24919.2	66838.7	17955.1	0.0772406	0.387368	1.5461
193	LysoGPLs	2288.89	1635.84	834.549	1319.32	602.9	515.698	1040.26	611.642	17920.6	11110	30161.8	51027.4	11947.8	31822.4	16683.7	15311.6	0.00249796	0.0475796	1.38676
194	LysoGPLs	5445	2127.2	3212.66	1277.88	4260.7	2833.25	1320.15	1040.11	5171.02	2275.82	1217.43	1244.61	4722.05	1176.68	3562.13	1963.92	0.977465	1.00859	0.173141
195	LysoGPLs	4045.07	4159.31	3343.49	4258.15	4030.49	2733.99	6007.03	2249.14	1091.28	935.659	613.503	822.479	713.223	533.997	694.208	598.637	9.47694e-05	5.13523	0.578463
196	LysoGPLs	29881.9	32392.5	35236.5	19887	36848.8	39732	36800	44875.2	55355.3	34602.8	22841.6	50671.9	14693.8	52726.3	13499.5	15184.9	0.779539	1.06194	0.555521
197	LysoGPLs	12213.1	8940.41	12746.5	15660.4	11484.3	11819.5	10353.2	8105.6	215.719	0	0	102.655	350.021	152.512	328.892	26.956	2.68567e-06	77.6057	1.14284
198	LysoGPLs	13299	8215.8	5159.52	16849.8	11907.4	5264.9	5566.11	6657.29	1723.62	2456.89	1330.32	2732.83	713.67	2181.99	898.136	706.123	0.0017146	5.72208	0.849376
199	LysoGPLs	6839.26	7543.24	7187.01	9066.09	6731.97	6455.76	7313.46	5957.47	6951.92	5869.43	6125.69	8924.26	4946.24	7556.96	5282.24	4758.14	0.191575	1.13249	0.196542
200	LysoGPLs	10684.1	16053.6	15796.9	13649.2	13617.6	11389.1	11653	9670.36	10413.9	9750.29	10194.4	9198.09	6407.1	13257.5	1715.37	9218.37	0.0167625	1.46125	0.536805
201	LysoGPLs	2.24208e+06	4.63794e+06	2.54356e+06	4.17145e+06	2.89551e+06	1.16115e+06	2.65321e+06	1.24626e+06	3.12425e+06	3.00954e+06	2.0925e+06	4.89288e+06	1.74881e+06	4.41959e+06	1.76863e+06	2.22074e+06	0.728253	0.925858	1.60907
202	LysoGPLs	13562.2	28480.3	16827.8	27330.6	17475.6	9227.06	12385.9	8726.17	13067.8	11642.7	5834.99	25695.9	5765.29	16951.9	5512.32	7004.62	0.169665	1.46504	0.485703
203	LysoGPLs	1923.46	2887.67	1497.64	3551.37	2571.49	1058	1654.9	880.622	3900.65	4538.15	1691.35	9658.14	1950.07	6455.87	1161.55	2498.31	0.09993	0.50308	0.327079
204	LysoGPLs	7547.23	8676.33	8802.26	9804.79	8755.39	5666.32	10047.7	5771.5	1541.25	1209.01	1812.75	1385.43	763.553	1062.86	1398.84	1681.12	5.44149e-06	5.99473	0.782277
205	LysoGPLs	4866.08	3802.83	5275.29	5277.8	6187.08	5003.62	4214.48	4141.1	6989.66	6825.04	5172.97	8227.32	3683.02	9466.8	3760	3694.24	0.210611	0.810729	0.268758
206	LysoGPLs	6032.38	7895.49	6223.91	8274.84	6479.3	4789.6	5541.68	4117.36	9282.25	7240.11	7296.17	10376.1	7194.64	10546.7	7125.72	8209.15	0.00765985	0.73367	0.368099
207	LysoGPLs	3571.7	5489.24	4103.89	5755.76	4741.12	2662.49	5795.13	3662.46	38909.6	24948.8	45447.8	62060.5	33228	57892.7	30127.5	37730.4	8.90718e-05	0.108316	1.82463
208	LysoGPLs	2796.03	7886.24	7221.09	6987.18	5469.26	3188.07	2777.5	5250.3	4736.13	4270.2	3986.03	3053.73	3186.99	4381.24	3324.34	4441.48	0.134873	1.3249	0.227353
209	LysoGPLs	9654.76	10384.6	6736.62	7630.51	8610.46	5122.52	5973.99	7862.99	19514.9	11529.5	12957.6	20708.2	10051	17433.3	10389	12394.9	0.0024552	0.539027	0.711896
210	LysoGPLs	44200.9	115462	55356	86139.1	61421	30944.6	130946	61411.3	278996	166569	300272	371256	258634	322797	235791	306778	4.58621e-06	0.261427	4.26871
211	LysoGPLs	64562.1	129007	76992.9	106699	76219.8	44359.2	73827.6	42193.8	187698	128674	115254	229441	110021	182836	100895	145129	0.00242734	0.511573	2.25356
212	LysoGPLs	7481.58	15411.7	7099.9	10635.2	8811.83	5867.71	8012.12	9041.6	9751	6029.57	7020.91	13446.6	7815.17	12376.1	8724.09	10304.1	0.782649	0.958843	0.106574
213	LysoGPLs	28440	34977.3	30252.2	30869.3	26030.2	42792.1	32547.8	16447.3	5826.55	8026.82	2878.4	3357.24	3067.2	5119.51	3922.75	2470.27	1.43004e-05	6.99063	1.51353
214	LysoGPLs	4494.04	6482.65	6017.31	6501.05	6352.85	4310.45	5729.36	3945.08	12006.3	10707.8	11753.7	15777.4	7753.78	13778.2	6498.11	8214.66	0.00167918	0.506797	0.662994
215	LysoGPLs	10717.3	18406.4	13011.6	16195.2	15707.2	9743.9	8516.86	9830.49	7409.61	6183.14	5345.34	10035	4459.54	6542.28	4293.32	5521.35	0.000970233	2.05121	0.777085
216	LysoGPLs	7192.41	10684.8	9864.29	10568.4	10947.2	6401.24	5100.33	9493.08	6074.12	7420.98	6729.99	8520.95	14608	6557.84	7179.54	5279.52	0.461297	1.12635	0.407075
217	LysoGPLs	10798.5	10355.1	10417.7	11241.7	10044.9	7545.34	8891.32	7134.91	11563.4	9466.41	9958.86	9729.68	9106.73	11565	9891.56	9280	0.43514	0.94871	0.132772
218	LysoGPLs	42635.3	82361.8	47799.1	72552.2	55591.3	26701.5	83205.8	43004.2	105611	82863.1	103900	181871	79467.6	225495	66159.8	94907.3	0.0183541	0.482679	2.11063
219	LysoGPLs	81152	167688	120055	140909	117290	43292	101771	46326.9	117530	154612	69447.2	199491	52575.2	154582	41239.4	58561.2	0.888828	0.96515	0.448333
220	LysoGPLs	24405.9	19946.2	19717.5	25983.1	19269.6	20085.7	25481	14643.8	12930.5	11144.6	13585.9	12890.8	10934.8	11150.3	12116.7	10398.8	0.000154263	1.7817	0.880945
221	LysoGPLs	146921	66317.6	157117	63711	132178	72065.7	72167.1	88998.8	186616	337065	223536	369237	553708	288937	444722	318190	0.000484374	0.293708	4.4963
222	LysoGPLs	112064	123069	116274	135314	108062	107028	128469	71740.5	217967	121648	299846	517095	235812	387568	229595	199627	0.00725728	0.408309	3.6318
223	LysoGPLs	66505.4	65495	106087	73973.6	77759.8	53181.1	85156.5	41750.5	42105.6	26435.6	76576.8	41282.1	21776.8	33586.5	25230.3	27502.3	0.00251967	1.9352	1.62174
224	LysoGPLs	300641	436935	729496	477903	566519	481121	172131	285869	260320	489112	506027	442774	988317	340982	740824	228393	0.544912	0.863355	1.97641
225	LysoGPLs	712.271	596.561	424.385	637.321	478.509	467.904	409.58	358.273	9381.8	8671.21	16256.9	11402.4	5061.25	9180.99	5936.52	5306.68	0.000376386	0.0573726	0.863108
226	LysoGPLs	8655.53	6743.02	7834.14	9492.69	9497.77	5926.6	13219.7	4787.45	1668.95	1661.94	1387.96	1684.82	887.102	1686.14	1261.11	1156.3	0.000135644	5.80613	0.760041
227	LysoGPLs	386944	342706	395690	293829	966449	496513	433439	266960	390636	772278	1.86722e+06	1.23685e+06	1.03225e+06	632207	1.7275e+06	548654	0.0212475	0.43649	5.8293
228	LysoGPLs	47269.4	40121.3	29785.7	40525.7	57321.2	32170.9	19730.7	20733.1	61932.4	35409.6	28351.5	29459.3	68127.3	26088.2	47914.7	23115.8	0.600282	0.897813	0.58377
229	LysoGPLs	8338.82	8886.15	9634.79	9201.11	7880.62	4733.76	5715.78	5529.15	3980.72	3862.56	3749.34	5872.32	3010.42	4268.61	3474.9	2878.23	0.000639328	1.92687	0.526644
230	LysoGPLs	3287.84	4174.81	3371	4714.68	4668.31	1862.54	3687.28	2138.71	52988	47643.2	60233.6	77658.6	52250.1	63444.4	47205.1	42850.7	3.12473e-06	0.0628107	2.19319
231	LysoGPLs	13619.4	5950.12	6662.07	7247.71	7866.07	7145.03	5517.79	5248.05	15964.1	16690.1	18668.5	21652	36232	23092.2	29729.8	21865.2	0.0002049	0.322231	1.13516
232	LysoGPLs	1787.2	2394.78	2689.65	1876.77	1935.14	1596.25	1259.39	1611.76	14237.9	14141.2	16640	21667.2	13156	20245.2	10534.9	12945	1.79899e-05	0.122612	1.11096
233	LysoGPLs	3830.92	1994.1	4802.97	3950.77	2228.54	2533.54	2982.33	1268.62	24449.3	15921.9	16136.1	35025.4	14441.4	27411.1	17567.3	18659.8	0.000149358	0.139092	1.25806
234	Sterol Lipids	13496.2	22099.6	16103.4	12975	17202.8	13246.7	10736.4	9516.37	3000.06	2463.47	1917.25	2509.02	1338.33	2095.01	2357.98	1791.48	4.73339e-05	6.60329	1.15871
235	Sterol Lipids	8701.84	27514.7	14536.6	12561.9	11770	14560.5	5384.07	6750.55	1415.79	1640.23	1412.78	1354.53	756.151	1444.63	1021.29	927.42	0.0021653	10.2058	1.0457
236	Glyceroglycolipids	3432.32	3088.36	3062.55	2603.01	2041.93	2290.92	2777.6	1718.57	35367.3	38295.8	46477	49542.2	40379.4	49954.9	31056.5	37867.7	8.70217e-07	0.0638876	1.88724
237	Glyceroglycolipids	6175.67	6293.07	6289.56	6362.03	6695.67	4896.49	4564.43	3915.93	14486.5	18342.3	9570.74	40824.6	3806.25	30980.2	4271.09	7042.29	0.0619869	0.349454	0.84341
238	Glycerolipids	37282.5	39876.3	20876.8	46875	32477.4	20520.6	16455.6	22392.4	158513	159174	125152	181400	132134	198614	123931	136976	7.67756e-07	0.194718	3.7259
239	Glycerolipids	38345.8	26655.3	22561.4	33004.5	29188.1	18949.2	27548.8	19911.3	37252.3	47162.7	23653.9	40882	19367.1	54369.2	19111.3	30768.3	0.202618	0.793069	0.540044
240	Fatty Acyls	2.85608e+06	2.50235e+06	2.53796e+06	2.30543e+06	2.49363e+06	2.51155e+06	2.43237e+06	2.14336e+06	382023	463730	252838	314891	226192	250412	323746	254383	3.68689e-10	8.01499	14.2401
241	Fatty Acyls	11158.8	9915.47	10540.4	10421.6	11370.5	9939.35	12470.1	10340	7107.05	9390.38	10708.2	9615.59	11454	8765.26	10343.9	10063.6	0.0754239	1.11244	0.222733
242	Fatty Acyls	263.289	317.288	208.38	491.359	321.167	398.725	323.068	348.575	7440.88	8928.6	7690.24	16120.4	6548.4	11353.4	5942.55	7068.58	0.000179251	0.0375825	0.863399
243	Fatty Acyls	7652.91	5475.05	6847.2	5910.15	6590.71	5841.05	5724.39	8256.48	6343.65	4095.95	4722.99	4162.29	5414.89	4885.8	3134.12	4752.71	0.00199933	1.39415	0.357734
244	Fatty Acyls	4163.58	3963.52	3751.54	4247.6	4101.46	3792.8	3899.72	3345.3	1513.41	1660.14	1446.69	1487.02	1194.02	1361.94	1338.33	1416.17	7.52201e-10	2.73833	0.481299
245	Fatty Acyls	1965.55	879.506	1606.68	1380.55	1334.98	2444.32	1357.29	3730.31	2378.99	2837.28	3039.66	3137.85	1627.64	3097.15	2048.83	1870.7	0.105668	0.733563	0.219846
246	Fatty Acyls	2602.97	2399.89	2228.8	2548.4	2235.39	1884.91	1517.46	1575.79	614.966	514.749	678.041	653.974	449.634	842.09	297.605	577.977	4.3673e-06	3.67109	0.372396
247	Fatty Acyls	1762.41	1543.34	1768.92	1689.28	1543.3	1406.95	945.596	1816.77	3786.52	2605.06	1784.17	4004.75	1440.72	2619.96	1157.26	1409.67	0.083512	0.663361	0.216477
248	Fatty Acyls	4648.49	3579.16	3930.8	4616.76	4047.99	5434.03	3983.91	8443.4	4931	4386.62	5703.01	3986.34	5656.62	11586.2	5858.8	2960.18	0.47239	0.858344	0.2087
249	Fatty Acyls	18775.1	22885.9	14424.4	19816.5	14514.4	8373.47	4378.99	8988.94	71929.5	70593.5	52846.6	78018.1	33842.3	68745	39731.9	49941.1	5.3565e-05	0.240864	1.92879
250	Fatty Acyls	2301.75	2855.6	1847.64	2120.53	1430.35	1319.86	551.164	1515.68	1956.13	1900.26	1151.19	2021	1340.85	2151	593.297	1291.85	0.550578	1.1239	0.0586357
251	Fatty Acyls	2306.94	1803.38	2089.32	2258.2	1670.35	910.686	747.287	1347.13	1279.84	1463.87	1274.53	1563.37	863.371	1374.36	667.841	846.208	0.0736577	1.40713	0.150999
252	Fatty Acyls	3876.6	4424.93	3792.24	4553.14	4164.84	3255.74	1707.26	2392	1994.34	3133.24	2143.48	1607.31	1552.84	2392.21	1316.69	1349.3	0.00274317	1.81845	0.332879
253	Fatty Acyls	27237.2	35286.4	21503.9	31157.9	29264	12831.9	8757.79	18250.8	2086.83	2105.79	2575	2074.36	1021.44	1449.09	1557.82	1314.35	0.000339628	12.9922	1.33368
254	Fatty Acyls	48028.8	58941.1	50040.5	65079.3	49114.3	29343.4	13544.4	40779.8	107789	108130	73781.2	127301	50670.9	114258	50077.7	65463.9	0.00530551	0.508797	1.70341
255	Fatty Acyls	1708.98	1408.63	990.247	1505.68	1496.8	1153.69	1553.7	901.091	2137.96	3381.03	1202.95	2001.37	689.397	2461.19	574.274	860.535	0.401785	0.805398	0.0882003
256	Fatty Acyls	9596.24	11443.3	7289.94	10951.4	9434.75	4661.81	5247.25	8649.55	24042.9	49294.4	9409.17	57984.3	13343.1	27138.3	7498.77	9976.51	0.0468051	0.338593	0.938806
257	Fatty Acyls	12210.8	13480	8201.52	15175.9	9425.23	2583.05	2062.02	6283.14	4464.82	4900.99	3007.94	4530.6	2006.52	4143.42	2337.9	2755.1	0.0197769	2.46637	0.564306
258	Fatty Acyls	34065.9	33083.9	44954.4	32875.8	34421.7	49572.3	35350.2	53163.8	33302	28337.2	36045.1	33988.6	55577.6	45695.7	55819.7	47397.6	0.63006	0.944446	0.303239
259	Fatty Acyls	180201	303182	322387	281872	307464	196896	333337	320310	325213	327656	321039	300952	360526	312040	300616	360348	0.0738816	0.860933	1.63863
260	Fatty acyls	4297.42	3096.67	3712.65	5790.71	3802.12	4927.81	3597.11	2128.67	25763.8	27431.4	24813.6	27755	16396.7	27516.1	23426.1	23121.9	3.09462e-07	0.159782	1.37603
261	Fatty acyls	11712.5	10558.9	13329.8	9863.9	10918.1	4686.02	5774.47	2954.88	1526.3	2475.46	941.04	1459.22	657.581	774.936	1152.09	647.457	0.000670047	7.24497	0.784702
262	Fatty acyls	1.37586e+06	1.12335e+06	802676	1.21915e+06	1.48844e+06	1.22812e+06	707315	1.046e+06	751379	1.11886e+06	526102	558459	338813	568941	576142	501798	0.00123961	1.81984	5.97893
263	Fatty acyls	103247	89068.8	97046.1	88476.7	92611.5	85724.2	70007.3	73749.5	20679.2	65651.1	13885.4	12523.8	10825.9	15476.1	15241.9	12281.7	1.89917e-06	4.20215	2.42372
264	Fatty acyls	5741.01	4177.51	7749.22	6992.4	5001.39	5822.75	3294.83	4881.86	611.879	545.413	396.167	579.709	302.761	140.037	290.868	347.866	2.0458e-05	13.5817	0.671766
265	Fatty acyls	2449.32	2021.61	3490.07	3665.16	6899.87	2001.57	1735.16	3388.83	387.053	493.368	277.621	395.877	200.027	467.727	263.914	270.507	0.00185102	9.30723	0.460857
266	Fatty acyls	3479.65	3221.92	2921.23	2724.12	2426.3	1790.53	1391.7	1800.34	1630.89	3392.02	1550.52	2100.19	1031.33	1997.64	669.972	1201.05	0.0721522	1.45546	0.188894
267	Alkaloids	1600.85	3049.14	1650.49	1106.13	1721.35	2021.98	1563.01	1386.76	921.726	2788.21	1414.29	2308.01	464.418	738.937	3056.15	851.978	0.645574	1.12405	0.0707776
268	Alkaloids	50940.3	53140.1	52665	55836.7	53422.3	44518.3	44707.6	42656.9	1145.96	849.641	666.653	704.655	530.119	1269.05	964.063	802.147	1.96536e-08	57.3963	2.14244
269	Alkaloids	96510.7	83388.9	76096.4	80724.3	80957.9	76367.2	73838.5	67548.4	2125.74	2982.32	1600	1959.94	1036.92	2058.44	2258.51	1560.43	3.01707e-08	40.7791	2.69559
270	Alkaloids	286126	270776	228175	265759	256460	238635	222167	221291	2491.81	2935.15	1331.87	816.249	965.039	805.195	2456.85	2558.26	1.6512e-08	138.533	4.81383
271	Amino acids, peptides and derivatives	16212.2	14228.9	15790.4	13740.8	14729.2	14103.5	10142.1	12341.3	53161	13034.1	14164.9	95195.8	86900.2	17377.2	82320.9	7054.12	0.045803	0.301424	1.30044
272	Amino acids, peptides and derivatives	5548.41	7375.66	5689.6	1731.92	1233	4075.84	4114.93	414.907	693.425	1328.79	0	725.165	0	276.244	0	0	0.00544095	9.98281	0.547559
273	Amino acids, peptides and derivatives	14839.7	15713.1	15119.2	13459.7	13310.5	15612.5	15546.1	12349.6	21805.5	21250.1	32007.7	32657.3	27462.1	29292.4	22564	22851.1	0.000133555	0.552433	1.01012
274	Amino acids, peptides and derivatives	369846	362864	386084	332200	365821	313078	330531	291146	98065.3	104158	91318.3	81744.7	88963.1	94483.4	88953	99118.3	4.111e-08	3.68446	4.84331
275	Amino acids, peptides and derivatives	17484.6	18215	12077.1	14363.3	13185	13299.4	13746	9450.42	42541.9	50786.6	44248.5	55888.9	37090.9	53079	38747.3	31368.5	7.76916e-06	0.3161	1.64198
276	Amino acids, peptides and derivatives	155694	88608	73619.1	119760	109596	139154	120683	100513	260447	298756	370652	414090	377834	385286	326216	310579	4.1614e-07	0.330785	4.54654
277	Amino acids, peptides and derivatives	2613.8	35055.3	35601.9	27228.1	2551.01	41385.3	39220.1	4691.83	7043.19	19249.1	13578.7	2496.8	1417.98	2002.28	865.259	389.065	0.0246448	4.00377	1.16549
278	Amino acids, peptides and derivatives	151067	164620	152683	156200	159521	131131	157821	126547	93771	98535.3	125929	106486	97322.1	104660	79858.2	90324.1	3.42634e-06	1.50535	2.08339
279	Amino acids, peptides and derivatives	9962.96	16807.9	8136.78	6568.39	2596.98	10933.7	4961.9	8188.13	9007.95	7507.45	8457.31	5684.25	634.399	424.941	6404.16	2107.65	0.09633	1.69426	0.48152
280	Amino acids, peptides and derivatives	6726.26	5789.64	5026.68	5940.6	4928.36	4923.3	5541.22	3531.41	179043	149195	182441	204697	156722	241604	311851	194945	1.46127e-05	0.0261694	4.19329
281	Amino acids, peptides and derivatives	131096	85623.8	96690.2	180296	96082.3	89317.1	150621	92833.8	24360	23218.8	0	32352	23624.6	23496.6	511.103	0	3.52595e-05	7.23219	3.26668
282	Amino acids, peptides and derivatives	35939.4	24436.8	21961.1	11412.3	13426.2	29395.7	28030.7	25194.7	41338.4	41211.8	39746	44977.6	16534	29691.9	35515.5	35456.9	0.0155282	0.66719	1.0905
283	Amino acids, peptides and derivatives	32954.8	70101.5	64226.5	34940.1	39922.9	63902.4	112290	49641.8	235832	249846	1932.06	237703	234002	192805	773.049	49800.4	0.0551751	0.38911	2.48104
284	Amino acids, peptides and derivatives	16756.5	1.68739e+06	7964.06	1.40901e+06	200974	1.40112e+06	198010	484648	439798	454028	451758	346194	392691	353381	431392	447752	0.328894	1.62975	2.74941
285	Amino acids, peptides and derivatives	88697.9	78646.7	68355	88018.5	42459.4	80057.8	1782.16	81258.1	125188	135302	123536	104496	115676	32008.4	121079	120265	0.0147332	0.603129	1.73222
286	Amino acids, peptides and derivatives	104182	266893	145209	98166.2	234669	223433	79189.5	201017	275679	277623	247891	302559	250478	321201	278504	254154	0.00335191	0.612639	2.74354
287	Amino acids, peptides and derivatives	135877	147033	171659	179714	103456	181010	170425	61128.6	193212	153687	275985	348479	153599	175427	170997	122602	0.0966876	0.721651	1.9482
288	Amino acids, peptides and derivatives	14163	16705	10599.4	20849.5	12255.5	23090.9	16581.8	14887.8	396798	432255	80791	182384	344371	265899	339181	312405	0.000248203	0.0548548	4.99099
289	Amino acids, peptides and derivatives	191554	170633	161378	233626	171714	245586	217536	172037	4.02282e+06	4.7766e+06	2.68243e+06	868703	1.70552e+06	4.18191e+06	3.70702e+06	3.60881e+06	0.00038392	0.0612066	17.4871
290	Amino acids, peptides and derivatives	89298.2	67259.9	73237.1	74813.8	80870.4	67951.1	54750.8	73668.5	57461.6	42354.4	52969.4	67307.6	50694.6	59950.6	65023	67296.9	0.00773678	1.25654	1.052
291	Amino acids, peptides and derivatives	1136.52	6263.18	7092.21	4254.78	3168.27	6265.89	7789.41	5075.45	9021.7	6918.08	13514.3	10628.1	8158.42	12078.3	10547.7	10652.4	0.000355202	0.503511	0.707628
292	Amino acids, peptides and derivatives	907.284	798.523	578.886	1077.96	881.622	754.147	671.748	656.806	582.582	638.174	418.106	594.299	546.61	438.362	1390.93	487.23	0.245118	1.24149	0.0783786
293	Amino acids, peptides and derivatives	11029.3	9512.31	7666.8	12189.7	9882.72	11474.6	11893.7	10029.2	177091	399403	142271	128380	97190.9	173653	162329	174828	0.00116984	0.057505	4.0614
294	Amino acids, peptides and derivatives	22098.7	22920	19919.3	19433.3	20878.3	20509.1	20027.3	20404.4	5630.01	5534.93	5160.6	4704.01	4252.37	5212.88	5699.08	4287.89	7.49714e-12	4.10532	1.35887
295	Amino acids, peptides and derivatives	77739	81892.3	86371.3	69032.5	78147.7	73404.5	61833.9	65964.2	513714	507999	743721	247085	603948	700507	616168	509743	4.47824e-05	0.133784	6.45145
296	Amino acids, peptides and derivatives	6959.53	5950.34	6772.8	4974.58	6496.95	6203.5	6003.49	6377.25	2659.11	3561.34	3064.91	2874.56	1944.59	3565.36	3350.74	2377.68	2.76902e-08	2.12573	0.607812
297	Amino acids, peptides and derivatives	37794.1	37163.3	37400.6	32355.8	36825	46887.9	35860.8	40463.1	42734.8	41684.3	47401.6	59048.6	35989	54593.3	41167	40163.3	0.0420544	0.840038	0.78988
298	Amino acids, peptides and derivatives	14350.4	16170.3	15406.3	13842.5	13281	10258	13042.7	11584.6	3554.53	3687.87	1124.55	3056.29	2145.54	1973.45	2692.4	2875.84	6.86241e-08	5.1129	1.11857
299	Amino acids, peptides and derivatives	13303.3	12478.6	14913.9	10214.1	11663	10811.2	13531.4	13274.3	9620.12	9000.01	11042.3	10815.7	9258.22	9944.28	7431.78	9020.95	0.000724164	1.31598	0.523795
300	Amino acids, peptides and derivatives	455.122	522.513	472.111	470.962	515.94	469.508	451.118	595.328	74155.6	39558.7	119606	132274	100294	122927	105592	84003.1	4.3142e-05	0.00507778	2.94494
301	Amino acids, peptides and derivatives	259623	282602	209589	210715	261106	240831	234735	204230	127206	120466	131621	119549	89821.2	120785	123839	93733.4	4.75927e-07	2.05328	3.29317
302	Carbohydrates	2.69433e+06	2.30661e+06	2.48354e+06	2.71168e+06	2.4606e+06	2.36907e+06	2.37888e+06	2.10185e+06	2.3468e+06	2.65929e+06	2.05059e+06	1.8951e+06	1.54149e+06	1.87252e+06	2.09167e+06	1.91171e+06	0.0158673	1.19166	4.81887
303	Carbohydrates	713913	829215	763809	739866	747811	731295	658952	620952	772227	797919	830379	818121	683805	819034	800413	733798	0.0714027	0.928084	1.58299
304	Carbohydrates	815056	868877	677043	786308	752983	946920	696533	636112	1.44578e+06	1035496	660742	748702	491944	788405	886209	779282	0.465705	0.903939	1.23311
305	Carbohydrates	445819	479674	489981	400860	394083	447918	400954	423103	608813	615772	677228	567912	625293	627887	646780	593926	4.98993e-08	0.701584	4.04181
306	Carbohydrates	93525.9	89703.6	98556	101062	145479	95653.1	98666.1	83229.4	1.79905e+06	1.19004e+06	2.35858e+06	2.08652e+06	2.17925e+06	2.15047e+06	2.03691e+06	1.9379e+06	1.43684e-06	0.0512033	13.0657
307	Carbohydrates	99763.1	119690	130975	98582.6	73989.4	106536	87306.7	93482.5	167170	121983	162398	166258	147723	172689	167509	151965	1.49819e-05	0.644293	2.13928
308	Carbohydrates	4534.71	3200.37	3099.58	5618.17	5356.2	5452.87	5316.67	4085.93	135235	104427	121514	121198	103293	110205	119867	81027.8	3.01075e-07	0.0408852	3.1598
309	Carbohydrates	2556.26	1382.03	1236.23	3142.18	1530.21	1144.6	2788.8	1092.18	21318.8	2081.86	2357.8	27581.5	1619.58	21374.6	5044.86	14041	0.0299134	0.155863	0.828457
310	Carbohydrates	1331.16	1214.82	1167.99	1150.23	1088.91	764.755	926.532	658.193	5267.33	11075.9	7636.59	13540.8	14678.5	11448.4	8117.04	7868.71	0.000105736	0.10426	0.876103
311	Carbohydrates	41641.8	36492.4	46020.2	43479.6	29205	38788.3	44514.9	42171.1	605.376	525.742	392.854	65.6442	456.531	453.54	646.571	462.31	1.46941e-07	89.3188	2.15699
312	Lignans and norlignans	9208.85	10930.6	7324.8	11047.5	9606.2	8227.48	8443.18	5656.17	68781.1	51198.9	50395.9	54187.5	43710.7	57602.4	60767.5	62628.6	2.72943e-07	0.156797	2.07698
313	Lignans and norlignans	3625.41	3628.49	2737.09	4096.02	3243.85	2918.98	3046.76	2278.6	22480.7	20550	19075.2	24933.5	16112.1	22734.2	20482	18699.7	1.95967e-07	0.154938	1.27044
314	Lignans and norlignans	944010	1.04989e+06	607171	1.03953e+06	720883	493954	565378	679811	32996.6	32900	28397.2	33513	27330.8	56260.2	33588.2	27650.4	3.14559e-05	22.3765	8.044
315	Nucleosides	18200.9	50152.2	45870.7	13877.9	39031.6	22706.7	17201.8	27747.7	33752.5	50064.8	22180.7	12401.6	18085.2	2943.99	14718	24980.5	0.343047	1.31074	0.465368
316	Nucleosides	7779.98	7871.28	8623.66	12049.1	10340	10851.8	7809.51	10727.8	63069.8	80087.7	111642	78735.8	58059.9	72565.1	82716.1	69347.8	6.78305e-06	0.123418	2.7765
317	Nucleosides	68200.7	98986.6	124266	68619.4	91831.4	65979.7	66094.5	53768.5	351261	301200	258275	405047	310490	281067	286176	309023	1.11913e-07	0.25484	5.14038
318	Nucleosides	27808.9	34536.6	43652.1	27026.3	32967.2	24830.7	29745.1	22106.4	148137	99332	93036	164516	146332	118373	101319	110604	1.39503e-05	0.24721	3.20285
319	Nucleosides	33089.9	31374.8	2579.55	14295.2	3316.03	2662.83	2093.75	2289.28	178658	177578	161382	131352	160741	135701	164550	131101	6.27169e-10	0.0738894	3.63804
320	Nucleosides	5484.68	4375.27	5106.68	5063.19	3356.57	3675.17	4873.94	3691.7	1717.96	12810.1	12609.1	8807.18	10896.2	14041.4	12078.8	9812.67	0.00332232	0.430418	0.651507
321	Nucleosides	4580.83	6346.33	5292.8	4773.95	5491.68	5353.82	4574.96	2985.25	7481.21	7717.28	8470.61	10106.2	18189	9493.98	6721.79	6850.59	0.0119005	0.525114	0.535128
322	Organic acids	33901.5	42982.4	43620.2	58798.9	46841	14601.8	49614	28412.6	12649	12275.4	1478.78	8345.02	4808.48	10471.5	7674.66	8625.76	0.000242881	4.80596	1.801
323	Organic acids	169133	170625	150354	178645	172049	169490	149488	137385	389630	397819	399692	408298	298008	393264	369266	314041	4.7474e-07	0.436754	4.37689
324	Organic acids	1.06044e+06	1.01563e+06	913633	1.02456e+06	1.03067e+06	983145	948245	844930	2.27605e+06	2.28062e+06	2.18654e+06	2.4484e+06	1.78309e+06	2.41474e+06	2.30079e+06	1.83621e+06	8.67506e-07	0.446255	10.5415
325	Organic acids	5.91371e+06	5.12436e+06	4.1686e+06	4.59229e+06	4.39786e+06	4.19311e+06	4.33502e+06	3.06269e+06	6.89445e+06	7.34117e+06	8.9894e+06	7.1629e+06	5.78209e+06	6.99324e+06	4.12174e+06	8.23706e+06	0.00173092	0.644566	12.9894
326	Organic acids	397684	392058	323573	425734	381970	350813	324402	326706	300905	313101	281815	384303	301072	366981	302368	307390	0.0296312	1.1427	1.54655
327	Organic acids	107641	116298	97131.9	85904.4	97902.2	86858.4	96370.9	87436.7	301.931	301.988	240.387	517.279	379.054	894.772	185.067	208.277	3.62423e-08	256.06	3.00451
328	Organic acids	12756.3	10921.7	9735.44	9210.23	9553	7263.27	7870.82	9006.06	10134.8	6008.57	7252.46	5966.71	7304.18	14281.3	8219.42	8747.19	0.374449	1.12372	0.171179
329	Organic acids	50598.7	71270.6	82008.1	84287.9	71196.4	88941.8	62524.4	65644.9	3161	2418.03	4000.81	2154.22	1750.02	3886.45	2277.42	1629.51	1.05128e-06	27.0931	2.52159
330	Organic acids	8568.23	7150.05	7920.15	6204.77	10088	9486.94	7366.52	7521.74	110155	108996	118793	108561	89904.7	123063	93998.8	93864.5	6.42401e-08	0.0758925	3.02609
331	Other compounds	7106	5022.26	5619.93	6494	4346.33	5518.63	8244.42	5045.23	24465.3	24074	23006.1	20333.2	12743.9	23288.6	21106.4	20981.2	2.47818e-06	0.278807	1.32418
332	Other compounds	46706.6	66219	85734.8	48232.8	62243.7	41732.3	37385	45636.4	29001.6	26093.1	30327	27444.6	23287.8	24230.8	20148.8	26079.7	0.00139496	2.10001	1.63976
333	Other compounds	279057	311286	305824	246510	304469	238462	326197	183230	1.9481e+06	1.1408e+06	1.83032e+06	1.47726e+06	1.33668e+06	2.33518e+06	1.8579e+06	1.25605e+06	2.67853e-05	0.166514	12.3643
334	Other compounds	61593.7	67028.4	74136.7	62411.2	53609.2	62157	48191	54386.2	74273.6	104489	81609.6	73822.9	75378.3	71982.7	72573.8	67155.5	0.00460784	0.778247	1.16038
335	Other compounds	22220.7	22125.9	15615.1	25194.3	21553.5	22540	18026.4	24111.5	12168.7	13037.4	12970.6	14235.3	14083.1	13272.9	13561.6	13098.2	0.000123166	1.61036	0.919615
336	Other compounds	1634.23	1831.02	1649.38	1846.62	1726.25	1896.91	1849.04	1416.38	7457	6500.16	9507.3	8993.89	8404.7	10539.9	8277.64	7197.03	1.60416e-06	0.207092	0.873024
337	Other compounds	91419.6	73226.2	87520.5	63274.3	74635.4	71817.4	65751.3	68801.8	51612.2	36003.7	29828.7	29572.6	25414.1	35820.7	37662.1	27395.6	5.80885e-07	2.18231	2.09839
338	Other compounds	6127.19	6523.53	6647.46	5918.01	6270.25	8761.96	8958.24	5781.07	9197.15	10418.8	8341.37	12040.5	8336.89	10373.6	11502.4	10109.4	0.000268186	0.684606	0.552707
339	Other compounds	46798.7	41310.2	41714.1	42756	46792.3	45241.5	55227.6	50577.2	141784	148523	93716.6	95317.8	92383.9	41906.2	126963	109486	0.00150267	0.435744	2.37078
340	Other compounds	61752.4	31960.3	51656.6	55498.2	58244.8	42019.5	49207.6	50606.6	39424.7	37740.7	42397.3	44250.1	39804.4	43032.9	40953.9	40666.5	0.0304775	1.22139	0.724562
341	Other compounds	142505	148986	120056	146282	149521	110031	102405	143398	13136.9	13674.8	13359.4	14887.5	13508.1	13420	16096	15124.4	4.36814e-07	9.3915	3.31048
342	Other compounds	81771.2	67750.7	48531	75364.5	65816.1	30573.4	20321.8	50109.5	10863.1	12173.8	7338.2	18481.4	7020.22	13112.8	4628.96	9757.11	0.000547049	5.28018	1.89806

## Sheet: Table S5
Table S5. The details of the metabolites in each module.
Number	Amino acids, peptides and derivatives	Amino acids, peptides and derivatives
1	Steroidal saponins	grey
2	Steroidal saponins	grey
3	Steroidal saponins	blue
4	Steroidal saponins	blue
5	Steroidal saponins	blue
6	Steroidal saponins	blue
7	Steroidal saponins	blue
8	Steroidal saponins	blue
9	Steroidal saponins	blue
10	Steroidal saponins	turquoise
11	Steroidal saponins	blue
12	Steroidal saponins	grey
13	Steroidal saponins	grey
14	Steroidal saponins	blue
15	Steroidal saponins	blue
16	Steroidal saponins	blue
17	Steroidal saponins	blue
18	Steroidal saponins	blue
19	Steroidal saponins	grey
20	Steroidal saponins	blue
21	Steroidal saponins	blue
22	Steroidal saponins	blue
23	Steroidal saponins	turquoise
24	Steroidal saponins	grey
25	Steroidal saponins	blue
26	Steroidal saponins	turquoise
27	Steroidal saponins	blue
28	Steroidal saponins	blue
29	Steroidal saponins	blue
30	Steroidal saponins	blue
31	Steroidal saponins	blue
32	Steroidal saponins	blue
33	Steroidal saponins	blue
34	Steroidal saponins	blue
35	Steroidal saponins	blue
36	Steroidal saponins	blue
37	Steroidal saponins	blue
38	Steroidal saponins	blue
39	Steroidal saponins	blue
40	Steroidal saponins	blue
41	Steroidal saponins	blue
42	Steroidal saponins	blue
43	Steroidal saponins	blue
44	Steroidal saponins	blue
45	Steroidal saponins	blue
46	Steroidal saponins	blue
47	Steroidal saponins	blue
48	Steroidal saponins	blue
49	Steroidal saponins	blue
50	Steroidal saponins	blue
51	Steroidal saponins	blue
52	Steroidal saponins	blue
53	Steroidal saponins	blue
54	Flavonoids	turquoise
55	Flavonoids	turquoise
56	Flavonoids	turquoise
57	Flavonoids	turquoise
58	Flavonoids	turquoise
59	Flavonoids	turquoise
60	Flavonoids	turquoise
61	Flavonoids	turquoise
62	Flavonoids	turquoise
63	Flavonoids	turquoise
64	Flavonoids	turquoise
65	Flavonoids	turquoise
66	Flavonoids	turquoise
67	Flavonoids	turquoise
68	Flavonoids	turquoise
69	Flavonoids	turquoise
70	Flavonoids	turquoise
71	Flavonoids	turquoise
72	Flavonoids	turquoise
73	Flavonoids	turquoise
74	Flavonoids	turquoise
75	Flavonoids	turquoise
76	Flavonoids	turquoise
77	Flavonoids	turquoise
78	Flavonoids	turquoise
79	Flavonoids	turquoise
80	Flavonoids	turquoise
81	Flavonoids	turquoise
82	Flavonoids	turquoise
83	Flavonoids	turquoise
84	Flavonoids	turquoise
85	Flavonoids	turquoise
86	Flavonoids	grey
87	Flavonoids	turquoise
88	Flavonoids	turquoise
89	Flavonoids	turquoise
90	Flavonoids	turquoise
91	Flavonoids	turquoise
92	Flavonoids	turquoise
93	Flavonoids	turquoise
94	Flavonoids	turquoise
95	Flavonoids	grey
96	Flavonoids	turquoise
97	Flavonoids	turquoise
98	Flavonoids	turquoise
99	Flavonoids	turquoise
100	Flavonoids	grey
101	Phenolic acids	blue
102	Phenolic acids	blue
103	Phenolic acids	blue
104	Phenolic acids	blue
105	Phenolic acids	grey
106	Phenolic acids	blue
107	Phenolic acids	grey
108	Phenolic acids	turquoise
109	Phenolic acids	turquoise
110	Phenolic acids	blue
111	Phenolic acids	blue
112	Phenolic acids	turquoise
113	Phenolic acids	turquoise
114	Phenolic acids	turquoise
115	Phenolic acids	turquoise
116	Phenolic acids	turquoise
117	Phenolic acids	turquoise
118	Phenolic acids	grey
119	Phenolic acids	blue
120	Phenolic acids	turquoise
121	Phenolic acids	blue
122	Phenolic acids	turquoise
123	Phenolic acids	grey
124	Phenolic acids	turquoise
125	Phenolic acids	turquoise
126	Phenolic acids	blue
127	Phenolic acids	blue
128	Phenolic acids	turquoise
129	Phenolic acids	turquoise
130	Phenolic acids	grey
131	Phenolic acids	turquoise
132	Phenolic acids	turquoise
133	Phenolic acids	blue
134	Oxylipins	grey
135	Oxylipins	grey
136	Oxylipins	blue
137	Oxylipins	blue
138	Oxylipins	blue
139	Oxylipins	blue
140	Oxylipins	blue
141	Oxylipins	blue
142	Oxylipins	blue
143	Oxylipins	turquoise
144	Oxylipins	blue
145	Oxylipins	blue
146	Oxylipins	blue
147	Oxylipins	blue
148	Oxylipins	blue
149	Oxylipins	grey
150	Oxylipins	blue
151	Oxylipins	blue
152	Oxylipins	turquoise
153	Oxylipins	blue
154	Oxylipins	blue
155	Oxylipins	grey
156	Oxylipins	blue
157	Oxylipins	blue
158	Oxylipins	grey
159	Oxylipins	blue
160	Oxylipins	blue
161	Oxylipins	grey
162	Oxylipins	blue
163	Oxylipins	blue
164	Oxylipins	blue
165	Oxylipins	blue
166	Oxylipins	turquoise
167	Oxylipins	turquoise
168	Oxylipins	turquoise
169	Oxylipins	blue
170	Oxylipins	blue
171	Oxylipins	blue
172	Oxylipins	blue
173	Oxylipins	grey
174	Oxylipins	grey
175	Oxylipins	grey
176	Oxylipins	turquoise
177	Oxylipins	turquoise
178	Oxylipins	turquoise
179	Oxylipins	blue
180	Oxylipins	blue
181	Oxylipins	blue
182	Glycerophospholipids	blue
183	Glycerophospholipids	blue
184	Glycerophospholipids	blue
185	Glycerophospholipids	blue
186	LysoGPLs	blue
187	LysoGPLs	blue
188	LysoGPLs	blue
189	LysoGPLs	blue
190	LysoGPLs	turquoise
191	LysoGPLs	grey
192	LysoGPLs	grey
193	LysoGPLs	turquoise
194	LysoGPLs	grey
195	LysoGPLs	blue
196	LysoGPLs	grey
197	LysoGPLs	blue
198	LysoGPLs	blue
199	LysoGPLs	grey
200	LysoGPLs	blue
201	LysoGPLs	grey
202	LysoGPLs	grey
203	LysoGPLs	turquoise
204	LysoGPLs	blue
205	LysoGPLs	grey
206	LysoGPLs	turquoise
207	LysoGPLs	turquoise
208	LysoGPLs	grey
209	LysoGPLs	turquoise
210	LysoGPLs	turquoise
211	LysoGPLs	turquoise
212	LysoGPLs	grey
213	LysoGPLs	blue
214	LysoGPLs	turquoise
215	LysoGPLs	grey
216	LysoGPLs	grey
217	LysoGPLs	turquoise
218	LysoGPLs	grey
219	LysoGPLs	blue
220	LysoGPLs	blue
221	LysoGPLs	blue
222	LysoGPLs	turquoise
223	LysoGPLs	blue
224	LysoGPLs	grey
225	LysoGPLs	turquoise
226	LysoGPLs	blue
227	LysoGPLs	blue
228	LysoGPLs	turquoise
229	LysoGPLs	grey
230	LysoGPLs	blue
231	LysoGPLs	turquoise
232	LysoGPLs	turquoise
233	LysoGPLs	turquoise
234	Sterol Lipids	blue
235	Sterol Lipids	blue
236	Glyceroglycolipids	turquoise
237	Glyceroglycolipids	turquoise
238	Glycerolipids	turquoise
239	Glycerolipids	grey
240	Fatty Acyls	blue
241	Fatty Acyls	grey
242	Fatty Acyls	turquoise
243	Fatty Acyls	turquoise
244	Fatty Acyls	blue
245	Fatty Acyls	grey
246	Fatty Acyls	blue
247	Fatty Acyls	turquoise
248	Fatty Acyls	grey
249	Fatty Acyls	turquoise
250	Fatty Acyls	grey
251	Fatty Acyls	blue
252	Fatty Acyls	blue
253	Fatty Acyls	blue
254	Fatty Acyls	turquoise
255	Fatty Acyls	grey
256	Fatty Acyls	turquoise
257	Fatty Acyls	blue
258	Fatty Acyls	grey
259	Fatty Acyls	grey
260	Fatty Acyls	turquoise
261	Fatty acyls	blue
262	Fatty acyls	blue
263	Fatty acyls	blue
264	Fatty acyls	blue
265	Fatty acyls	blue
266	Fatty acyls	blue
267	Alkaloids	grey
268	Alkaloids	blue
269	Alkaloids	blue
270	Alkaloids	blue
271	Amino acids, peptides and derivatives	grey
272	Amino acids, peptides and derivatives	blue
273	Amino acids, peptides and derivatives	Amino acids, peptides and derivatives
274	Amino acids, peptides and derivatives	blue
275	Amino acids, peptides and derivatives	Amino acids, peptides and derivatives
276	Amino acids, peptides and derivatives	Amino acids, peptides and derivatives
277	Amino acids, peptides and derivatives	blue
278	Amino acids, peptides and derivatives	grey
279	Amino acids, peptides and derivatives	grey
280	Amino acids, peptides and derivatives	blue
281	Amino acids, peptides and derivatives	blue
282	Amino acids, peptides and derivatives	Amino acids, peptides and derivatives
283	Amino acids, peptides and derivatives	Amino acids, peptides and derivatives
284	Amino acids, peptides and derivatives	grey
285	Amino acids, peptides and derivatives	blue
286	Amino acids, peptides and derivatives	blue
287	Amino acids, peptides and derivatives	grey
288	Amino acids, peptides and derivatives	blue
289	Amino acids, peptides and derivatives	Amino acids, peptides and derivatives
290	Amino acids, peptides and derivatives	blue
291	Amino acids, peptides and derivatives	blue
292	Amino acids, peptides and derivatives	grey
293	Amino acids, peptides and derivatives	Amino acids, peptides and derivatives
294	Amino acids, peptides and derivatives	blue
295	Amino acids, peptides and derivatives	blue
296	Amino acids, peptides and derivatives	blue
297	Amino acids, peptides and derivatives	Amino acids, peptides and derivatives
298	Amino acids, peptides and derivatives	blue
299	Amino acids, peptides and derivatives	blue
300	Amino acids, peptides and derivatives	Amino acids, peptides and derivatives
301	Amino acids, peptides and derivatives	blue
302	Carbohydrates	blue
303	Carbohydrates	grey
304	Carbohydrates	grey
305	Carbohydrates	blue
306	Carbohydrates	blue
307	Carbohydrates	turquoise
308	Carbohydrates	turquoise
309	Carbohydrates	turquoise
310	Carbohydrates	blue
311	Carbohydrates	blue
312	Lignans and norlignans	turquoise
313	Lignans and norlignans	turquoise
314	Lignans and norlignans	blue
315	Nucleosides	grey
316	Nucleosides	turquoise
317	Nucleosides	turquoise
318	Nucleosides	turquoise
319	Nucleosides	turquoise
320	Nucleosides	turquoise
321	Nucleosides	blue
322	Organic acids	blue
323	Organic acids	turquoise
324	Organic acids	turquoise
325	Organic acids	turquoise
326	Organic acids	blue
327	Organic acids	blue
328	Organic acids	blue
329	Organic acids	blue
330	Organic acids	turquoise
331	Other compounds	turquoise
332	Other compounds	blue
333	Other compounds	turquoise
334	Other compounds	turquoise
335	Other compounds	blue
336	Other compounds	turquoise
337	Other compounds	blue
338	Other compounds	turquoise
339	Other compounds	blue
340	Other compounds	blue
341	Other compounds	blue
342	Other compounds	blue
